# Supplementary material for: Nanopore 16S rRNA sequencing reveals alterations in nasopharyngeal microbiome and enrichment of Mycobacterium and Mycoplasma in patients with COVID 19
Source: medRxiv preprint, doi:10.1101/2021.11.10.21266147, version 1 (2021-11-10)
Supplement: Supplemental Table 1 [file 266147_file08.xlsx]

## Sheet: Sheet1
Table1: DESeq2 Table
OTUS	baseMean	log2FoldChange	lfcSE	stat	pvalue	padj	C1	C2	C3	C4	C5	C6	C7	C8	C9	C10	C11	C12	IA1	IA2	IA3	IA4	IA5	IA18	IA19	IA20	IA21	IA22	IA24	IA25	IA27	IA29	IA30	IA35	IA37	IA39	IA40	IA41	IA42	IA43	IA44	IA45	IA46	IS6	IS7	IS9	IS10	IS11	IS12
500	166.575	9.38609	0.590769	15.8879	0	0	15	237	17	168	13	201	206	239	120	196	54	9	7	10	3	0	5	1	0	0	1	2	6	0	2	4	3	5	0	0	0	0	0	2	0	1	1	0	6	0	2	11	0
502	171.833	9.6024	0.602412	15.9399	0	0	9	213	11	159	19	224	192	286	120	223	64	16	7	8	4	0	11	0	0	1	0	1	3	0	1	7	5	4	0	0	1	0	0	3	0	0	0	1	1	0	1	16	3
504	165.877	10.0051	0.61238	16.338	0	0	11	233	13	179	23	228	203	267	115	195	55	14	4	5	6	2	4	0	0	0	1	0	4	0	1	4	2	4	0	0	0	0	0	1	0	0	0	2	6	1	0	16	1
505	146.161	9.27871	0.582791	15.9212	0	0	14	234	23	170	18	197	192	244	97	169	52	17	4	4	6	2	8	2	0	1	0	0	4	0	4	5	1	3	0	0	0	1	0	6	1	0	1	3	8	0	0	10	3
506	157.126	9.45232	0.612773	15.4255	0	0	13	209	13	153	17	212	193	230	115	165	58	15	4	6	4	2	3	0	0	1	0	2	11	1	1	3	2	0	0	0	1	0	0	2	0	1	1	5	0	0	1	13	2
507	156.635	9.40112	0.576849	16.2974	0	0	23	203	18	149	7	198	185	235	112	197	65	14	7	11	4	1	6	0	1	0	1	2	4	0	1	3	3	8	0	0	0	1	0	1	0	0	0	2	5	0	3	14	0
511	154.575	9.72231	0.594415	16.3561	0	0	13	178	13	155	23	184	182	218	115	182	42	18	7	6	3	3	4	1	1	0	1	0	3	0	2	3	2	6	0	0	0	0	0	3	0	0	0	3	3	0	2	9	1
512	150.632	9.46372	0.632378	14.9653	0	0	13	171	10	163	14	184	178	225	111	166	28	11	10	10	2	1	6	0	0	0	0	1	9	2	5	6	3	1	0	0	0	0	0	2	0	0	0	5	4	0	2	17	0
516	135.811	9.41073	0.632323	14.8828	0	0	6	164	16	148	15	188	193	226	92	155	35	16	5	7	0	1	3	0	0	0	0	0	2	0	0	7	1	8	0	0	0	0	0	2	0	1	0	4	8	1	3	17	2
517	142.152	9.28102	0.613047	15.1392	0	0	14	165	11	143	17	144	183	232	100	169	36	18	7	5	6	2	11	0	0	0	2	0	2	0	3	4	6	4	1	0	0	0	0	1	0	0	0	1	6	0	2	19	3
518	129.464	9.10898	0.580579	15.6895	0	0	10	179	13	143	11	154	168	214	87	161	42	15	5	3	2	1	5	0	1	0	1	1	9	0	2	5	3	7	1	0	0	1	0	2	0	0	1	2	4	1	5	16	0
519	137.457	9.2024	0.575224	15.9979	0	0	6	162	15	150	14	175	165	248	93	160	45	13	4	8	3	1	8	1	1	1	1	1	2	0	1	5	7	7	0	0	0	1	0	2	1	0	0	0	8	1	1	9	1
520	127.19	9.061	0.596692	15.1854	0	0	7	168	7	156	23	169	169	217	82	173	43	17	6	8	1	2	6	0	0	1	0	1	8	0	0	11	2	9	0	0	0	1	0	3	0	1	0	0	1	1	1	18	3
521	132.492	8.90907	0.587	15.1773	0	0	13	159	14	136	15	182	150	252	87	168	52	20	2	9	3	0	4	1	0	1	1	2	8	0	1	6	1	6	0	1	0	1	0	0	0	1	0	4	5	0	5	19	2
522	121.893	9.16868	0.585237	15.6666	0	0	16	174	17	153	19	153	173	207	76	181	49	16	4	7	4	2	5	0	0	0	0	0	6	0	2	7	2	7	0	0	0	0	0	2	0	0	0	1	2	0	1	16	2
523	132.841	8.96952	0.54571	16.4364	0	0	13	178	13	143	13	166	174	187	93	176	44	30	6	6	5	5	8	0	1	1	1	1	10	1	2	7	3	8	0	0	0	1	0	4	0	0	0	3	3	0	0	14	3
524	132.952	9.08789	0.585363	15.5252	0	0	10	198	15	141	15	172	180	220	91	138	30	17	4	9	0	3	3	1	1	0	0	2	9	0	2	6	2	9	1	0	1	0	0	1	0	0	1	4	5	0	3	8	0
525	132.077	9.12173	0.57632	15.8275	0	0	14	169	12	144	7	174	169	241	86	168	55	15	3	8	3	2	7	0	1	2	3	1	4	1	4	10	1	7	1	1	0	0	0	3	0	0	0	3	5	0	2	13	0
526	131.262	9.22488	0.602242	15.3176	0	0	11	186	14	146	18	149	175	201	90	167	34	18	5	3	6	3	7	0	1	0	0	0	9	1	2	6	1	4	0	0	0	2	0	0	0	0	0	1	5	0	1	17	1
527	121.284	9.13482	0.581142	15.7187	0	0	10	134	12	136	16	174	145	207	81	170	39	13	9	5	5	3	5	1	1	0	1	0	13	0	2	4	2	6	0	0	0	0	0	3	0	0	0	0	6	0	2	9	2
528	139.265	9.3029	0.604019	15.4017	0	0	11	180	22	126	22	160	185	197	101	160	37	20	2	8	1	1	4	0	2	0	1	0	6	0	3	3	1	1	1	0	0	1	0	4	0	0	0	4	6	1	1	19	1
529	135.447	9.11091	0.576712	15.798	0	0	11	163	17	153	17	161	163	196	97	165	35	22	5	7	3	2	3	1	0	1	1	1	3	0	2	9	3	8	1	0	1	0	0	3	0	0	1	0	6	1	1	13	2
531	130.938	9.36121	0.588761	15.8998	0	0	16	164	9	121	19	143	155	188	98	138	37	17	11	5	1	1	8	0	0	0	0	1	5	0	1	7	3	8	0	0	1	0	0	1	0	0	0	2	2	1	1	12	1
532	123.361	9.01883	0.572322	15.7583	0	0	17	151	13	117	19	167	146	196	86	156	29	25	6	7	4	2	9	1	0	0	1	0	2	1	2	11	6	4	2	0	0	0	0	4	0	0	1	1	5	1	0	13	2
533	115.077	9.21446	0.605615	15.2151	0	0	24	169	19	128	11	163	162	191	75	147	40	19	5	6	4	0	3	0	0	0	1	0	3	0	2	7	2	7	0	0	0	0	0	0	0	0	0	3	3	0	4	21	1
535	121.934	9.08201	0.583815	15.5563	0	0	15	162	10	131	15	130	138	179	89	141	36	25	5	6	10	1	6	0	1	0	2	0	6	0	3	6	2	8	0	0	0	0	0	3	0	1	0	1	2	0	2	9	1
536	111.199	8.87202	0.569673	15.5739	0	0	16	137	20	119	13	136	145	183	74	150	28	23	8	7	1	2	8	1	1	0	0	3	5	0	3	6	2	5	1	0	0	1	0	5	0	0	1	2	4	1	2	13	1
537	116.165	8.79605	0.566286	15.5329	0	0	20	167	7	139	15	154	154	189	76	153	29	16	6	5	7	1	6	0	2	1	0	0	6	0	1	7	3	5	0	0	0	2	0	2	1	0	0	3	7	1	3	15	2
538	110.272	9.03578	0.572471	15.7838	0	0	15	136	23	114	15	133	151	181	72	160	41	26	4	4	2	1	5	1	0	0	1	0	9	0	3	12	3	4	0	0	0	1	0	3	0	2	0	0	8	1	2	10	0
539	123.144	8.69279	0.60987	14.2535	0	0	9	133	11	106	21	131	129	179	92	149	27	30	5	13	3	2	9	1	2	1	0	1	8	0	2	5	0	8	1	0	0	0	0	5	0	0	3	5	3	1	3	17	1
540	111.521	8.78051	0.580126	15.1355	0	0	17	122	14	118	23	137	118	167	82	130	39	21	8	12	9	1	6	0	0	2	0	1	5	0	2	9	2	3	0	0	0	1	0	2	0	0	1	3	9	0	2	18	2
541	95.9508	8.94934	0.572241	15.6391	0	0	17	117	13	115	16	151	145	188	54	161	35	24	5	6	7	3	3	0	0	0	0	1	5	0	0	5	4	5	0	0	0	1	0	3	1	0	0	1	8	0	2	15	0
542	109.254	8.80835	0.589216	14.9493	0	0	18	132	18	123	14	118	127	168	78	126	30	31	8	6	4	1	9	0	1	0	0	1	6	0	2	7	3	10	0	0	1	1	0	0	0	0	0	2	4	1	5	19	1
543	115.745	8.89945	0.567216	15.6897	0	0	20	146	22	126	12	137	152	168	81	149	27	44	5	7	6	3	4	1	0	0	1	0	5	0	3	9	2	12	0	0	0	1	0	2	0	0	0	2	6	0	3	20	1
544	113.995	8.63314	0.579675	14.8931	0	0	26	125	22	116	23	134	149	179	81	117	27	30	5	9	3	2	5	0	0	1	0	1	11	0	2	9	4	2	1	0	0	2	0	0	0	0	2	4	5	2	2	14	1
545	113.617	8.86487	0.569197	15.5743	0	0	21	120	17	107	20	133	129	194	80	133	33	31	8	10	4	2	3	1	0	0	0	0	7	1	1	8	3	3	0	0	0	0	0	3	0	0	0	2	7	1	4	12	3
546	128.466	9.01659	0.591113	15.2536	0	0	32	140	25	99	17	133	130	164	100	162	21	35	8	10	1	0	6	0	1	1	0	1	7	0	2	6	2	9	0	0	0	0	0	0	0	1	0	0	6	0	4	18	1
547	112.876	9.02246	0.568786	15.8627	0	0	20	124	29	106	22	125	145	190	79	124	27	32	3	6	4	1	2	1	0	0	1	1	5	0	2	12	1	5	0	0	0	0	0	3	1	1	0	2	3	1	1	14	0
548	103.584	8.82066	0.575451	15.3282	0	0	24	117	27	99	23	122	149	174	67	150	31	32	11	3	5	5	2	0	0	0	0	0	6	0	2	8	4	8	0	0	0	1	0	1	0	0	1	1	6	1	3	12	0
549	116.652	8.79741	0.571173	15.4024	0	0	26	137	20	106	24	144	123	163	89	118	26	33	7	4	5	4	6	1	0	0	0	0	8	0	3	8	4	7	0	0	1	0	0	3	0	0	1	0	2	1	0	14	2
550	106.156	8.57108	0.552804	15.5047	0	0	27	119	20	108	17	119	125	178	73	133	27	37	8	4	8	1	7	0	0	1	0	2	7	2	5	8	2	8	0	0	0	0	0	1	0	0	1	1	6	1	2	22	2
551	92.3384	8.33548	0.518653	16.0714	0	0	30	128	20	109	22	121	148	173	54	128	29	31	7	10	5	2	5	1	0	0	1	1	7	1	3	12	1	7	1	0	1	1	0	2	0	0	0	3	8	0	1	19	1
552	111.956	8.77774	0.584554	15.0161	0	0	25	134	21	103	21	121	138	181	78	138	28	45	13	7	2	0	8	1	0	1	0	0	5	1	3	10	1	15	0	0	0	1	0	0	0	0	0	3	6	1	4	18	0
553	89.2249	8.37483	0.581089	14.4123	0	0	29	104	23	82	21	130	129	167	54	128	23	44	8	6	4	2	2	0	1	3	0	1	7	0	3	6	2	12	1	0	0	2	0	4	0	0	0	0	3	2	4	25	0
554	106.761	8.50709	0.550526	15.4527	0	0	27	137	15	103	18	127	133	166	74	134	31	43	9	12	6	5	5	1	0	1	1	2	5	0	4	10	3	13	0	0	1	2	0	1	0	0	1	0	8	0	3	19	1
555	110.953	8.63561	0.566875	15.2337	0	0	23	109	25	94	18	113	139	187	77	144	29	20	10	12	4	6	2	0	0	0	0	0	7	3	1	11	4	2	1	1	0	1	0	4	0	0	0	2	3	0	4	8	1
556	119.489	8.69561	0.560449	15.5154	0	0	17	101	17	115	18	110	114	170	94	123	31	37	4	9	9	2	6	0	2	1	1	0	8	0	2	12	4	9	0	0	0	0	0	2	0	0	0	2	5	1	2	18	4
558	103.864	8.52766	0.558989	15.2555	0	0	17	106	28	102	18	95	126	155	78	97	32	21	4	13	4	2	7	0	0	1	0	0	5	1	3	10	0	8	1	0	0	0	1	4	1	0	1	2	7	0	1	22	0
561	92.1134	8.24287	0.555846	14.8294	0	0	18	124	14	95	16	113	108	144	64	112	19	35	3	8	5	4	11	0	0	1	1	0	7	0	6	11	0	7	0	0	1	2	0	3	0	0	0	4	4	0	5	18	1
562	86.3643	8.35733	0.567893	14.7164	0	0	24	106	9	97	15	90	131	141	55	121	38	37	10	8	6	0	3	1	1	1	0	0	7	0	2	13	1	7	1	0	0	0	0	4	0	1	0	2	7	1	3	15	0
563	100.359	8.42345	0.573435	14.6894	0	0	21	110	17	114	10	127	119	144	72	123	29	39	7	14	7	4	3	1	1	0	0	0	8	2	3	10	3	12	0	0	0	1	0	0	0	1	2	0	9	0	1	14	0
564	88.9003	8.44601	0.561353	15.0458	0	0	20	124	16	77	14	97	128	149	58	116	15	29	9	6	2	1	3	0	1	0	1	0	8	2	3	12	2	5	1	0	0	2	0	2	1	0	0	1	6	1	0	19	1
565	87.8262	8.31422	0.551807	15.0673	0	0	20	112	9	99	13	98	131	137	59	107	18	21	4	8	3	2	4	0	0	0	2	0	9	0	3	13	1	10	0	0	1	0	0	5	0	0	1	3	8	0	2	11	2
566	98.5543	8.40954	0.569406	14.769	0	0	19	102	12	76	13	105	102	158	72	119	25	20	9	8	6	4	4	0	0	1	0	0	6	2	5	11	4	6	1	0	0	1	0	3	0	0	0	3	8	1	2	17	0
568	97.1458	8.34925	0.569786	14.6533	0	0	13	99	9	93	9	116	94	133	75	103	30	33	4	3	5	1	9	0	1	1	1	1	7	1	4	10	4	4	0	0	0	2	1	1	0	1	2	2	12	0	2	11	4
569	88.3435	8.09339	0.572211	14.1441	0	0	18	110	13	114	11	79	102	150	60	101	25	28	5	10	4	1	6	0	2	0	0	1	5	0	2	10	2	11	0	0	0	0	1	0	1	1	1	1	8	0	4	15	3
570	92.2062	8.35595	0.618407	13.5121	0	0	9	95	8	87	11	94	101	138	67	113	21	30	4	4	1	1	4	0	2	1	1	0	6	0	1	4	7	9	0	1	0	2	0	1	1	0	0	1	7	2	2	16	2
571	106.392	8.83742	0.602773	14.6613	0	0	11	94	9	80	8	101	120	147	83	115	19	12	5	7	3	2	8	0	1	0	2	0	6	0	4	8	2	5	0	0	1	0	0	3	0	0	0	0	6	2	1	17	0
573	74.9836	8.06741	0.552195	14.6097	0	0	18	95	7	76	9	98	97	130	47	116	16	19	12	9	5	5	8	1	0	1	0	0	9	0	3	13	4	8	0	0	0	1	0	3	0	0	1	2	8	1	5	14	1
574	84.4223	8.3326	0.582886	14.2954	0	0	16	81	11	75	10	111	126	140	57	98	26	21	4	9	3	0	7	0	0	1	1	1	10	0	2	18	4	7	1	0	0	0	0	5	0	1	1	1	1	2	3	15	2
575	87.9031	8.11819	0.597244	13.5928	0	0	5	82	5	90	8	94	101	140	62	114	22	15	11	6	4	3	5	0	1	0	1	2	8	0	3	12	6	4	0	0	1	5	0	2	0	0	1	3	5	1	1	16	2
576	80.0195	8.40144	0.584626	14.3706	0	0	13	104	6	74	7	90	94	131	55	107	14	15	8	6	2	2	1	0	0	0	2	2	6	1	1	3	5	7	0	0	0	0	0	4	0	0	0	1	4	0	3	11	0
577	76.6814	8.12988	0.599958	13.5508	0	0	5	99	4	95	11	91	97	131	50	92	22	11	11	5	4	5	6	0	0	0	2	0	8	0	1	10	4	6	1	0	0	0	0	3	1	0	1	2	6	3	2	16	2
579	81.284	8.01792	0.59844	13.398	0	0	12	86	9	80	7	83	101	138	56	97	15	16	4	7	7	8	7	2	0	0	0	0	5	1	2	10	0	11	0	2	1	3	0	2	0	0	0	1	5	0	2	17	0
580	84.4962	8.35327	0.592369	14.1015	0	0	7	83	4	80	12	76	107	122	62	103	18	14	8	8	4	2	4	1	0	0	0	0	10	0	7	6	2	6	1	0	0	1	0	1	0	1	3	1	3	0	2	16	1
581	69.5847	7.81756	0.583086	13.4072	0	0	7	90	3	88	4	80	93	118	44	92	17	12	6	3	3	2	6	1	1	0	0	1	7	0	6	15	4	7	0	0	0	0	1	2	1	0	1	0	8	1	4	12	1
582	77.9915	8.21404	0.574535	14.2969	0	0	8	94	1	84	9	91	110	124	52	104	21	10	5	10	6	1	4	1	1	1	0	0	10	0	2	6	2	12	0	1	0	1	0	3	0	1	1	1	5	0	3	15	1
583	66.4336	7.99354	0.5876	13.6037	0	0	5	85	4	64	18	77	82	126	43	80	19	12	11	6	5	2	9	0	0	0	2	0	6	3	3	9	7	6	0	0	0	0	0	1	0	0	1	2	7	1	0	15	2
584	80.204	8.16389	0.599573	13.6162	0	0	7	79	3	62	13	90	98	133	58	87	13	16	8	6	5	5	3	1	1	1	0	2	3	1	3	10	0	6	0	0	0	0	0	3	0	0	1	3	9	0	8	8	1
585	80.2431	8.04439	0.593352	13.5575	0	0	10	83	10	75	13	96	97	129	57	82	18	13	2	7	3	1	12	0	2	1	1	2	5	0	1	12	3	3	0	0	0	0	0	4	1	0	0	2	5	3	3	17	0
586	81.6207	8.16421	0.620594	13.1555	0	0	14	74	4	71	9	93	116	114	59	95	17	13	4	9	0	7	6	0	0	0	0	0	9	0	3	10	1	6	1	1	0	1	0	7	0	0	1	6	9	2	2	15	3
587	85.799	8.1204	0.642308	12.6425	0	0	11	81	5	80	9	100	105	107	64	102	15	18	4	4	6	4	8	1	4	0	0	0	5	0	2	8	6	5	0	0	0	0	0	5	1	0	0	3	3	4	1	11	0
588	74.0296	8.0964	0.591391	13.6904	0	0	7	71	5	70	9	87	110	95	54	88	23	6	7	9	7	3	2	1	0	0	1	0	7	1	2	8	3	11	0	0	0	1	0	6	0	0	0	3	4	1	1	18	3
589	75.9183	8.04628	0.561131	14.3394	0	0	4	87	8	65	12	82	91	108	54	106	16	16	6	12	5	2	6	0	2	0	1	1	6	0	1	9	1	4	0	0	0	1	0	3	0	1	0	3	7	1	5	14	0
590	77.301	7.91265	0.558277	14.1733	0	0	6	65	6	71	2	85	100	98	58	97	22	11	6	5	4	3	2	1	0	1	2	1	6	0	5	8	3	5	0	0	1	0	0	3	1	1	0	1	4	0	2	16	2
594	72.5465	7.84325	0.58126	13.4935	0	0	8	66	6	62	12	73	79	105	53	94	14	18	5	7	6	4	7	1	1	0	1	1	8	0	3	9	5	2	0	0	0	0	0	0	0	0	1	5	5	2	4	12	0
595	67.0874	8.02937	0.571398	14.0521	0	0	12	85	11	63	4	73	93	120	43	87	20	12	5	10	1	1	5	0	1	0	1	0	6	0	4	7	4	11	0	0	0	1	1	5	0	0	1	1	5	0	1	8	0
596	87.2257	8.17871	0.585823	13.9611	0	0	7	65	6	77	10	75	92	117	70	86	12	8	7	13	6	2	2	0	1	1	1	2	6	0	1	6	2	9	1	0	2	1	0	3	0	1	1	4	5	0	0	18	1
597	61.6578	7.92304	0.565865	14.0017	0	0	7	74	10	62	8	85	76	98	41	89	20	12	3	9	4	1	10	1	2	0	0	0	8	0	4	9	3	7	0	1	0	0	0	2	1	1	0	2	3	0	2	25	1
598	69.3353	8.0446	0.568614	14.1477	0	0	11	56	5	64	8	65	75	118	50	84	11	12	8	11	10	4	3	1	0	1	1	0	7	0	1	8	1	5	0	0	0	1	0	1	0	0	1	2	4	0	1	13	1
599	68.2463	8.03727	0.572013	14.0509	0	0	13	62	9	59	4	69	82	116	47	95	21	9	6	11	8	3	4	1	1	0	0	0	11	2	3	12	3	4	0	0	0	0	0	1	0	0	1	3	6	0	2	18	0
600	64.257	8.27481	0.653075	12.6705	0	0	3	61	3	55	5	68	62	101	45	105	18	13	5	9	7	5	1	0	0	0	1	0	9	0	2	6	4	4	0	0	0	0	0	2	0	0	2	0	6	1	0	13	0
604	63.1803	7.96355	0.594811	13.3884	0	0	10	58	6	62	9	59	94	97	43	88	19	17	14	8	4	4	5	0	0	0	0	1	10	0	5	10	4	7	0	0	0	1	0	4	1	0	0	2	2	0	2	13	5
605	71.2762	8.01146	0.569594	14.0652	0	0	5	70	6	58	7	70	84	106	52	92	13	10	5	7	4	2	3	0	1	1	0	2	8	2	2	12	2	5	0	0	1	1	0	5	0	0	0	1	3	0	1	11	1
607	64.9891	7.89209	0.561694	14.0505	0	0	7	61	11	77	9	69	82	99	46	79	16	13	4	5	2	2	3	1	0	1	0	0	8	1	5	7	5	7	0	0	0	1	0	5	0	1	0	3	6	0	0	10	1
610	59.4273	7.55539	0.548169	13.783	0	0	7	60	12	75	11	76	68	79	43	71	12	10	5	9	5	3	7	1	0	0	1	0	11	0	4	7	5	12	1	0	0	2	1	2	0	1	1	1	7	0	4	18	0
611	60.1717	8.11225	0.603406	13.4441	0	0	9	72	8	53	10	53	64	112	42	63	13	10	7	10	2	0	4	0	0	0	1	0	8	1	3	6	3	8	1	0	0	0	0	0	0	0	1	2	6	1	1	19	0
612	67.8809	7.99323	0.599622	13.3304	0	0	14	51	10	58	15	75	72	93	52	85	13	8	10	5	7	3	1	0	0	0	3	2	3	0	2	7	5	5	0	0	0	0	0	0	0	0	0	0	7	0	3	14	3
613	55.6365	7.82682	0.559302	13.9939	0	0	17	66	6	52	8	74	68	103	36	72	16	14	8	6	3	0	6	0	0	1	0	1	8	0	3	2	2	7	0	1	0	0	0	2	0	0	0	4	5	0	1	12	2
614	55.629	7.32237	0.543385	13.4755	0	0	7	53	7	60	4	62	72	72	40	70	14	11	10	8	4	6	7	2	0	2	1	0	8	0	7	11	1	10	1	0	0	0	0	4	0	0	1	3	6	1	3	15	2
615	62.5803	7.95592	0.581511	13.6815	0	0	17	53	4	55	8	63	68	87	47	82	10	15	6	7	7	5	7	0	2	0	1	0	14	0	1	11	0	8	0	0	0	0	0	2	0	0	0	2	3	0	3	13	1
616	65.0778	7.84323	0.595805	13.1641	0	0	14	59	9	56	8	50	57	97	50	75	10	11	6	11	5	7	2	0	1	0	0	1	10	0	4	10	4	10	0	0	0	0	0	4	0	0	3	4	9	1	0	14	0
617	53.9773	7.54253	0.563929	13.375	0	0	5	53	8	67	12	72	62	92	36	71	16	18	7	3	6	5	10	0	0	0	0	0	6	0	2	17	2	9	0	0	0	3	0	1	0	0	1	3	7	0	1	18	1
618	59.8382	7.83055	0.570002	13.7378	0	0	9	54	4	56	12	67	83	93	41	80	11	16	4	7	3	1	6	2	1	0	0	0	7	0	2	7	2	10	0	0	1	1	0	4	0	1	2	2	11	0	0	15	1
620	61.4478	8.06623	0.603724	13.3608	0	0	6	56	6	44	5	51	68	79	49	66	17	14	7	4	3	2	7	0	0	0	0	0	4	1	2	7	5	5	0	0	0	0	0	3	1	0	0	2	7	0	0	17	1
621	57.4296	8.00287	0.627294	12.7578	0	0	6	44	5	60	5	45	75	80	42	77	11	19	7	2	7	3	9	0	0	0	0	2	7	0	3	8	3	0	0	0	0	0	0	2	0	0	1	1	3	0	0	19	0
622	48.711	7.35106	0.581117	12.6499	0	0	6	60	4	52	7	52	71	60	34	66	17	14	5	3	5	3	4	1	0	3	0	1	7	2	4	9	5	11	0	0	1	0	0	2	0	1	0	0	2	0	2	16	0
623	57.5626	7.57936	0.55987	13.5377	0	0	12	54	11	56	7	44	71	83	43	60	17	15	5	6	7	2	3	1	0	1	1	1	8	0	5	9	5	9	0	0	0	0	0	4	0	0	1	6	5	0	4	10	0
624	49.9668	7.37473	0.575328	12.8183	0	0	6	45	5	48	12	49	63	73	34	71	14	13	7	6	4	2	5	1	1	0	0	0	9	0	6	7	2	8	2	1	0	1	1	0	0	0	0	5	6	1	1	11	1
625	54.3448	7.54238	0.582804	12.9415	0	0	11	39	4	45	8	46	68	87	38	75	11	10	7	5	4	3	6	0	1	0	0	0	8	0	3	8	4	8	0	0	0	0	1	2	0	1	0	2	7	0	0	15	2
626	59.6359	7.83004	0.578308	13.5396	0	0	11	58	8	46	7	44	65	79	45	79	11	9	4	3	5	1	4	1	0	0	1	1	11	2	1	8	2	4	2	0	0	0	0	6	0	0	0	1	9	1	2	11	1
628	58.1957	7.86269	0.568247	13.8367	0	0	12	39	7	59	12	59	66	83	44	68	14	19	9	7	5	0	8	0	0	1	0	0	4	0	4	5	5	10	1	0	0	1	0	2	0	0	0	2	7	0	0	12	0
629	61.0269	7.5966	0.560953	13.5423	0	0	16	49	4	45	6	57	64	70	49	72	17	16	8	10	4	4	6	1	0	2	0	0	9	0	3	12	8	8	2	0	0	2	0	2	0	0	0	2	6	0	2	19	1
630	51.7642	7.18782	0.605139	11.8779	0	0	11	48	3	54	9	34	57	70	39	52	14	9	8	7	0	3	8	0	1	1	0	2	6	0	3	7	3	7	0	0	0	1	0	1	0	0	0	5	8	2	3	19	0
631	52.5517	7.42527	0.552603	13.4369	0	0	12	49	8	46	7	47	69	85	37	61	11	22	5	4	8	3	3	0	1	1	0	1	10	1	4	7	2	11	0	0	0	0	0	2	0	0	1	3	4	0	1	17	0
632	53.0717	7.40551	0.583166	12.6988	0	0	10	40	9	53	13	42	68	76	39	59	11	15	5	8	2	5	8	0	0	1	0	1	9	4	7	14	4	7	0	0	0	0	0	3	0	0	0	3	7	1	0	21	0
633	56.8719	7.46405	0.550554	13.5573	0	0	9	44	4	46	8	47	60	68	45	66	15	17	5	13	2	3	6	1	1	0	1	0	7	1	3	11	5	7	2	0	0	1	0	4	0	0	0	3	3	1	3	18	1
634	52.4293	7.31853	0.555937	13.1643	0	0	10	39	8	40	4	42	59	84	37	75	16	17	5	6	6	5	6	1	2	2	0	0	6	0	2	9	5	6	0	0	1	0	0	1	0	1	1	1	2	0	1	20	1
635	48.2184	7.07998	0.524727	13.4927	0	0	15	41	12	48	9	47	58	70	33	73	12	19	5	11	9	2	8	1	0	1	1	0	3	0	1	9	3	11	1	0	1	2	0	3	0	0	1	1	7	0	2	23	2
636	48.0924	7.56653	0.586538	12.9003	0	0	8	36	8	50	13	48	59	92	31	69	11	24	2	10	5	3	5	0	0	0	0	1	9	0	6	6	3	12	1	0	0	0	0	2	0	0	0	0	10	0	2	22	2
637	52.923	7.18999	0.543176	13.2369	0	0	12	32	7	44	13	34	60	72	40	66	7	14	8	8	5	2	9	1	1	0	0	1	11	1	1	7	5	9	2	0	0	1	0	3	0	1	1	3	7	1	2	17	2
638	55.2959	7.3928	0.543396	13.6048	0	0	11	41	12	41	10	52	49	86	42	62	11	22	8	10	8	3	9	0	0	1	2	1	5	1	6	14	4	10	0	0	0	1	0	1	0	0	1	1	6	1	1	11	1
641	49.3282	7.22401	0.580247	12.4499	0	0	15	34	6	43	12	52	43	62	38	62	10	25	6	6	3	5	3	0	0	0	2	0	16	0	5	11	5	8	0	0	0	3	1	3	0	0	3	1	4	1	2	15	1
642	42.2575	7.24493	0.568145	12.7519	0	0	14	47	5	48	12	46	53	72	28	51	10	12	3	7	7	0	6	1	0	0	0	2	8	1	0	7	2	7	0	0	0	3	0	5	1	0	1	3	4	0	2	16	3
644	45.1985	7.22025	0.574804	12.5612	0	0	5	32	6	41	14	41	56	81	31	48	7	8	7	6	7	4	6	0	0	0	1	1	10	0	2	4	6	8	1	1	0	1	0	0	0	0	0	2	7	2	3	17	0
645	46.3083	7.57308	0.584493	12.9567	0	0	10	38	2	35	15	46	54	70	34	57	8	19	9	10	1	5	4	1	1	0	0	1	7	0	4	11	5	5	0	1	0	0	0	0	0	0	0	1	1	0	3	14	1
646	38.3301	7.36364	0.572448	12.8634	0	0	12	60	7	40	15	43	59	62	24	51	10	13	6	6	1	3	5	0	0	0	0	2	8	1	1	7	3	2	0	0	0	0	0	0	0	0	0	3	6	0	4	12	0
647	39.3697	6.99883	0.548917	12.7503	0	0	13	35	7	35	12	34	51	57	28	48	15	15	5	4	5	2	6	0	0	0	1	0	5	3	3	15	4	7	1	0	0	2	0	3	0	0	0	1	3	0	1	18	0
648	51.9016	7.31599	0.554154	13.2021	0	0	18	38	10	29	10	48	62	74	40	50	10	17	13	8	4	2	6	2	0	2	0	0	8	0	5	8	1	4	0	0	0	0	0	2	0	1	0	4	4	1	2	10	3
649	50.9926	7.42996	0.554962	13.3882	0	0	14	38	8	47	14	38	47	76	39	54	10	21	8	5	8	2	11	0	0	0	1	0	7	0	4	8	2	1	0	1	1	1	1	1	0	1	0	0	7	0	2	18	1
650	44.8126	6.99951	0.54512	12.8403	0	0	10	34	8	40	5	44	39	66	33	62	8	12	6	9	4	2	5	0	0	0	2	1	10	0	4	13	4	10	1	0	1	2	0	1	0	1	1	4	4	0	2	15	1
651	34.0256	6.90498	0.561614	12.2949	0	0	12	31	4	36	11	36	39	63	20	66	8	19	7	11	2	2	9	0	1	2	0	0	5	1	4	10	5	8	0	0	0	0	0	4	0	0	0	1	6	0	0	18	2
652	43.1768	7.12617	0.54767	13.0118	0	0	11	36	3	40	5	39	43	54	33	58	9	15	14	9	7	2	14	0	0	0	1	1	8	0	4	7	3	8	1	0	0	0	0	2	0	0	0	1	5	0	1	15	1
654	45.0105	7.32908	0.571372	12.8272	0	0	11	37	4	45	15	39	38	61	35	54	5	19	6	4	7	2	8	0	0	0	0	1	6	0	3	13	2	8	0	0	0	1	0	2	0	0	0	3	5	0	3	16	0
656	41.7545	7.06404	0.572569	12.3374	0	0	10	28	3	49	3	43	37	74	30	46	13	11	6	8	5	1	6	0	0	0	2	2	13	0	5	6	7	5	0	0	0	1	0	4	0	0	1	4	5	0	3	14	0
657	41.2626	7.02922	0.541569	12.9794	0	0	7	31	7	41	11	42	50	58	30	51	10	12	7	7	7	3	7	0	1	1	0	2	3	0	2	13	4	7	0	0	0	2	0	4	0	1	0	3	4	0	5	18	1
658	41.1963	7.23277	0.565583	12.7882	0	0	10	35	8	49	6	34	42	68	29	50	12	10	8	8	6	4	6	1	0	3	0	0	10	0	3	7	3	5	0	0	1	0	0	1	0	0	1	0	1	0	1	16	1
659	36.9182	6.86232	0.55044	12.467	0	0	10	32	9	41	4	35	46	46	26	56	12	10	6	3	7	3	4	1	2	0	0	1	5	2	3	11	2	11	0	0	0	1	0	1	0	0	2	0	10	0	4	18	0
660	45.904	7.30295	0.572426	12.7579	0	0	10	31	2	40	6	40	39	62	36	56	12	18	6	7	5	1	6	1	0	0	0	1	7	0	5	7	4	8	0	0	0	0	0	3	1	0	2	3	8	0	1	12	1
661	42.5437	7.15691	0.569931	12.5575	0	0	5	37	7	42	4	36	43	55	33	47	11	20	8	8	4	4	9	0	1	0	0	0	11	1	4	4	2	10	0	0	0	0	0	0	0	0	2	4	6	0	1	19	1
662	43.347	7.14442	0.583242	12.2495	0	0	5	38	4	35	3	41	50	78	30	47	18	6	7	6	6	2	11	1	2	0	5	0	3	1	3	7	3	7	0	0	0	1	1	2	0	0	0	1	2	0	1	13	1
663	39.8076	7.31335	0.566958	12.8993	0	0	12	40	4	37	8	42	33	63	29	51	10	10	5	1	3	2	7	0	1	0	1	0	4	0	2	4	1	6	0	0	0	0	0	4	1	0	1	5	7	0	1	15	1
664	34.5874	6.92836	0.565836	12.2445	0	0	8	31	4	48	5	39	44	47	24	43	9	14	7	7	2	2	5	0	2	0	0	0	9	0	1	6	3	6	1	0	0	1	0	7	1	0	0	3	10	0	0	18	1
666	37.1648	7.26173	0.567159	12.8037	0	0	10	36	2	35	9	29	36	60	26	55	12	12	6	5	4	2	3	0	0	1	1	0	3	0	3	9	5	6	0	0	1	1	0	1	0	0	0	2	5	0	2	15	2
668	38.9596	7.13423	0.578052	12.3418	0	0	10	24	5	23	7	29	36	55	31	45	3	7	9	5	5	3	1	1	0	0	2	0	15	0	3	9	3	9	0	0	1	0	0	3	0	1	0	1	4	0	1	19	0
669	40.0915	6.93643	0.563049	12.3194	0	0	11	29	5	35	3	27	49	61	28	54	12	8	10	8	6	4	7	0	1	0	0	2	9	1	1	9	1	6	2	0	0	2	1	2	0	1	1	0	6	0	1	13	1
670	33.46	6.77372	0.599985	11.2898	0	0	3	19	11	34	5	32	46	48	23	38	13	14	5	7	5	2	6	0	0	0	0	0	7	1	5	9	1	9	0	0	0	2	1	3	1	0	2	1	5	2	2	19	0
671	43.7783	6.93896	0.570144	12.1706	0	0	6	17	6	33	4	36	46	61	33	60	11	5	7	6	5	5	8	0	0	0	0	2	7	1	6	8	1	11	0	2	1	3	0	3	0	1	0	4	4	0	2	14	0
672	44.4478	7.43434	0.616324	12.0624	0	0	11	37	6	33	4	37	49	73	33	49	5	12	3	9	5	6	4	0	1	0	0	0	16	0	1	9	4	8	0	0	0	0	0	3	0	0	0	2	3	0	5	16	0
673	32.5647	7.00746	0.603941	11.6029	0	0	6	33	0	31	5	30	37	57	22	43	12	16	6	9	4	4	7	0	0	2	0	1	3	1	2	7	5	6	0	0	0	0	0	0	0	0	0	3	9	0	1	13	0
674	37.0949	7.03415	0.565102	12.4476	0	0	6	26	6	22	8	36	34	52	29	40	10	12	10	6	8	1	2	0	2	0	0	0	8	0	3	9	6	9	1	0	0	0	0	3	1	1	0	1	4	1	0	16	1
675	30.9168	6.50398	0.543815	11.9599	0	0	6	18	3	26	3	27	45	45	22	35	10	9	5	7	5	3	6	3	2	0	2	1	10	1	4	13	4	9	0	0	1	0	0	1	1	0	0	1	6	0	3	12	1
676	26.7159	6.34039	0.549388	11.5408	0	0	9	26	3	24	9	29	29	50	16	46	10	16	7	9	8	2	6	0	0	2	1	0	5	0	3	9	5	9	1	0	0	0	0	5	0	0	0	0	11	0	3	22	0
678	35.1608	6.82765	0.566597	12.0503	0	0	4	26	5	27	2	36	36	57	26	35	6	18	5	8	4	3	3	0	0	0	1	1	2	0	8	12	1	8	0	0	0	1	0	7	0	0	0	2	3	1	2	20	2
680	31.5196	6.8136	0.547491	12.4451	0	0	13	22	5	27	7	36	25	49	23	44	14	6	3	7	3	2	8	0	0	1	1	1	9	0	2	5	3	12	1	0	0	0	0	2	0	1	0	2	3	0	0	21	1
685	29.316	6.52688	0.521939	12.5051	0	0	14	27	4	27	7	31	42	41	19	48	9	14	11	6	9	3	6	0	1	1	0	2	4	1	2	6	1	5	1	0	0	1	0	2	0	1	0	1	3	0	1	20	1
686	30.5397	6.83382	0.587184	11.6383	0	0	12	18	1	20	5	25	31	44	23	42	8	13	13	6	4	1	5	0	0	1	0	0	12	4	2	3	5	9	0	0	0	1	0	2	0	0	0	3	7	0	1	19	1
687	27.3591	6.58064	0.536739	12.2604	0	0	6	25	5	29	9	33	42	48	15	52	6	12	3	10	6	5	7	0	1	1	1	0	8	0	3	13	1	11	0	0	1	0	0	3	0	0	0	2	4	1	3	11	1
688	41.2422	6.82239	0.554133	12.3118	0	0	9	20	3	30	12	33	45	44	35	34	8	15	12	8	6	5	9	1	0	0	0	0	9	1	4	12	1	6	0	0	1	1	0	7	1	1	0	5	5	0	3	29	0
689	31.1259	6.78845	0.590005	11.5058	0	0	5	23	3	31	4	25	38	49	22	36	14	5	5	9	5	1	6	0	1	0	0	0	8	0	2	10	4	6	0	1	1	0	0	1	0	0	1	1	4	0	3	23	1
691	33.5355	6.66955	0.556239	11.9904	0	0	3	29	4	42	5	29	32	44	24	48	7	11	15	5	5	0	6	0	0	0	1	1	9	0	7	12	3	13	1	0	0	0	1	1	0	1	0	3	9	0	3	17	1
693	35.9197	6.82758	0.563943	12.1069	0	0	9	28	4	30	5	28	31	65	26	37	9	14	12	8	6	5	6	0	0	0	0	0	3	2	5	13	1	10	0	1	2	1	0	1	0	0	1	2	4	0	0	14	3
704	29.5858	6.35643	0.583608	10.8916	0	0	6	14	1	28	6	18	35	39	22	39	4	8	15	8	7	2	6	0	2	1	0	2	7	1	1	18	3	15	0	0	0	0	0	2	0	0	1	0	8	0	1	23	2
709	26.6094	6.50806	0.585145	11.1221	0	0	4	22	2	19	2	21	22	42	19	39	6	9	8	2	4	2	8	0	1	0	1	1	12	1	1	10	3	22	0	0	0	0	0	3	0	0	0	3	8	1	5	18	0
712	24.0568	5.74457	0.538262	10.6724	0	0	9	19	8	20	3	23	25	30	18	25	11	8	8	5	6	0	4	0	1	2	3	2	15	1	3	13	5	16	0	0	0	1	0	2	1	1	0	1	6	0	2	22	3
713	39.6087	6.88745	0.583649	11.8007	0	0	7	18	3	26	8	24	32	45	35	30	8	9	7	5	6	2	7	1	1	0	0	1	6	0	3	10	5	23	0	0	0	2	0	2	0	1	0	3	4	0	3	14	2
714	36.2828	6.62566	0.572674	11.5697	0	0	8	13	5	22	5	20	20	40	32	36	8	6	10	12	2	4	9	0	1	2	0	1	5	0	2	11	2	17	1	0	0	1	0	4	1	0	0	3	4	1	5	19	0
715	25.3738	6.21289	0.569512	10.9091	0	0	6	17	3	22	6	15	27	41	19	21	10	15	8	6	5	3	5	0	2	0	1	2	6	0	6	10	0	25	0	0	1	0	0	4	0	0	0	0	6	0	6	12	1
716	23.8731	5.9275	0.521847	11.3587	0	0	3	15	9	26	6	22	25	30	17	31	13	9	12	9	5	5	7	0	1	2	1	1	12	1	3	13	3	22	0	1	0	0	1	5	0	0	0	4	6	0	2	20	1
717	28.6461	6.40918	0.552821	11.5936	0	0	2	19	3	20	10	27	34	34	22	34	8	11	10	11	8	5	4	1	0	1	0	1	8	0	4	17	0	16	0	1	0	1	0	1	0	0	0	2	7	0	5	12	0
718	22.9219	5.90144	0.546699	10.7947	0	0	5	16	5	24	4	22	21	41	15	25	13	8	8	6	8	3	5	1	0	1	0	1	12	2	2	19	5	16	1	1	1	0	0	1	0	0	1	3	5	1	3	15	1
719	25.5571	6.40464	0.566762	11.3004	0	0	8	19	4	22	3	21	27	33	21	16	9	4	9	6	8	2	3	0	1	0	0	0	10	1	2	15	5	17	0	0	0	0	0	2	0	0	0	1	7	0	2	12	1
720	25.4868	6.27923	0.55119	11.3921	0	0	5	21	6	19	7	16	32	37	18	30	10	7	8	11	4	1	5	0	1	0	1	1	10	0	4	13	3	11	0	0	1	1	0	0	0	1	0	2	8	1	3	20	1
721	19.0798	5.69943	0.52548	10.8461	0	0	4	18	8	21	5	14	16	32	13	23	7	6	5	5	5	2	4	1	0	1	1	0	9	1	5	17	4	15	0	0	0	0	0	5	0	1	1	3	4	0	0	20	1
722	22.5524	5.9276	0.526316	11.2624	0	0	8	19	5	24	6	18	19	30	17	23	9	13	6	6	4	2	8	0	1	0	1	0	5	2	2	16	3	14	0	1	0	2	0	2	0	0	1	2	7	0	2	22	2
723	29.1549	6.54517	0.591981	11.0564	0	0	8	14	4	20	2	19	31	33	24	29	5	10	6	6	6	3	3	0	0	1	0	3	6	1	4	11	3	10	0	1	0	2	0	0	0	0	0	1	6	0	0	14	2
724	31.5219	6.30026	0.550407	11.4465	0	0	10	17	4	37	8	18	17	29	28	26	12	9	14	13	5	3	3	1	1	0	0	1	5	2	1	11	3	16	1	0	0	1	0	16	0	0	0	3	10	0	3	28	2
725	24.6424	6.29821	0.612057	10.2902	0	0	6	12	3	24	5	15	31	26	19	32	9	10	7	7	11	3	5	0	2	0	1	0	5	0	4	16	3	18	0	0	0	0	0	0	0	0	1	2	0	0	4	21	0
726	21.9595	6.17498	0.535599	11.5291	0	0	10	16	3	15	10	23	31	39	14	31	6	4	8	10	8	1	5	1	0	0	1	1	4	1	6	13	7	8	0	0	0	0	0	4	0	0	0	1	7	0	2	14	1
727	28.1618	6.79582	0.608482	11.1685	0	0	7	12	3	19	6	22	27	47	21	36	3	13	9	7	8	3	7	0	1	0	1	0	9	0	5	7	1	8	0	0	0	0	0	5	0	0	0	3	6	0	0	20	0
728	25.2958	6.05737	0.544652	11.1216	0	0	9	13	4	19	3	17	37	35	19	21	8	11	7	7	2	3	7	0	2	1	3	1	7	0	1	7	6	8	0	0	0	0	0	4	0	1	1	1	3	0	8	22	1
729	25.4798	6.41741	0.558612	11.4881	0	0	8	18	4	15	8	23	31	31	20	26	7	12	17	10	4	1	6	0	2	0	0	1	9	1	4	11	1	10	0	0	0	1	0	8	0	0	0	2	5	0	2	15	1
730	18.8264	5.8505	0.563687	10.379	0	0	7	9	1	20	2	17	30	39	10	29	9	9	6	6	7	6	5	1	1	0	0	0	7	1	2	8	5	9	0	0	0	2	0	0	0	1	0	0	3	1	3	16	1
731	16.1414	5.54714	0.540162	10.2694	0	0	5	19	2	19	9	14	13	34	9	26	2	12	5	8	10	3	5	0	0	1	2	0	9	0	4	9	3	12	0	0	0	3	0	5	0	0	0	1	4	0	1	17	0
732	26.7176	6.23801	0.594104	10.4999	0	0	5	14	10	15	4	24	30	32	22	21	4	8	5	9	11	4	5	1	0	0	2	1	7	0	3	7	2	15	0	0	0	3	0	2	0	2	0	4	5	0	6	20	2
733	27.1019	6.13566	0.587919	10.4362	0	0	4	10	5	18	1	18	20	30	23	27	5	9	11	9	2	5	8	3	0	1	1	1	4	0	3	8	7	18	0	0	0	1	0	3	0	0	1	3	8	0	2	26	2
734	23.9867	6.25483	0.580544	10.7741	0	0	5	11	5	21	6	15	28	23	19	22	13	6	7	6	2	2	5	0	1	1	0	0	5	0	3	10	2	11	1	0	0	1	0	4	0	0	0	2	8	3	4	12	1
735	27.1249	6.11981	0.561679	10.8956	0	0	4	11	3	20	3	21	29	30	22	24	11	6	9	6	8	4	5	0	0	1	1	2	8	1	2	7	4	11	1	0	0	2	0	2	0	1	1	1	9	1	1	23	0
736	23.3899	6.12648	0.568983	10.7674	0	0	9	19	2	12	8	16	22	32	18	25	5	12	9	8	7	0	1	0	0	2	1	0	10	1	5	9	5	8	1	0	0	1	0	3	1	0	1	1	4	0	4	16	0
738	17.1161	5.32379	0.530775	10.0302	0	0	4	17	7	16	3	15	19	28	10	25	7	14	4	11	5	5	5	0	0	4	1	1	7	0	4	11	3	7	1	1	0	0	0	2	0	0	2	2	8	1	3	23	1
739	22.8484	6.16198	0.584833	10.5363	0	0	2	11	4	18	8	13	20	39	17	21	9	0	3	5	4	3	5	0	0	0	0	2	10	1	3	15	3	14	1	0	0	0	1	4	0	0	1	2	3	0	2	23	1
740	27.4793	6.13273	0.571809	10.7251	0	0	7	15	3	21	4	11	25	23	23	33	10	12	8	5	9	2	7	1	0	1	0	0	7	1	6	7	3	9	0	0	3	1	0	5	0	0	3	4	6	0	0	24	1
741	19.6575	5.83998	0.555338	10.5161	0	0	4	14	1	16	8	18	20	27	14	27	8	4	6	7	7	4	4	1	0	0	2	0	8	0	0	12	3	8	2	0	0	1	0	3	0	0	0	4	7	0	4	13	2
745	25.3557	6.32272	0.587571	10.7608	0	0	2	8	0	16	3	17	24	26	22	23	5	6	8	9	3	2	4	1	2	1	0	0	6	0	3	10	5	11	0	0	0	1	0	4	1	0	0	1	8	0	3	17	1
747	21.6291	6.11185	0.582387	10.4945	0	0	3	11	2	21	2	25	18	31	17	17	11	6	8	5	6	3	10	2	1	0	0	1	4	0	0	11	4	12	0	1	0	1	0	2	0	0	0	1	13	0	0	10	0
749	17.1501	5.44271	0.550501	9.88683	0	0	4	10	3	19	10	10	15	16	12	28	4	7	6	8	4	4	6	0	0	2	2	1	6	1	3	5	3	3	0	0	1	1	1	2	0	0	1	0	6	1	1	15	2
750	14.536	5.24609	0.544684	9.63144	0	0	8	17	5	13	4	6	18	22	9	22	3	8	5	8	8	5	8	0	2	0	0	1	9	0	1	4	3	7	0	0	0	0	0	4	0	0	0	0	2	0	4	23	1
751	14.8913	5.45386	0.556305	9.80371	0	0	4	13	1	12	6	10	16	25	9	23	5	8	10	6	7	4	5	0	0	1	0	1	8	1	4	8	1	5	1	0	0	0	0	1	1	0	2	1	4	1	3	16	1
752	24.8798	6.22469	0.576625	10.795	0	0	8	12	3	14	4	14	17	31	21	20	3	6	8	6	4	1	7	2	1	1	1	2	3	0	1	11	4	5	0	0	0	0	0	3	1	0	1	4	6	1	1	21	2
753	21.1035	6.07529	0.565062	10.7515	0	0	6	15	3	19	4	8	15	24	17	24	4	9	5	12	5	4	4	1	0	0	0	0	11	1	1	8	4	8	0	1	1	2	0	2	0	0	1	1	2	0	2	16	2
754	15.4197	5.33332	0.539527	9.88519	0	0	1	11	4	18	3	24	20	26	8	28	7	5	3	11	5	1	4	0	2	1	1	1	9	1	4	6	1	7	1	1	1	1	0	2	0	0	1	2	6	0	0	18	1
755	16.7988	5.71627	0.566944	10.0826	0	0	5	10	4	16	1	12	27	25	12	11	6	9	9	12	6	0	3	0	0	0	0	0	10	0	1	11	6	7	1	0	0	0	0	1	0	1	2	3	5	0	1	15	1
756	21.0649	5.80761	0.579275	10.0257	0	0	4	9	2	15	4	17	19	16	17	29	4	11	7	7	4	1	8	1	0	0	1	1	6	0	3	3	3	9	0	1	0	0	0	0	0	0	0	2	3	1	2	24	1
757	16.5228	5.64616	0.556696	10.1423	0	0	8	11	5	19	4	8	13	18	13	16	10	4	5	4	10	2	8	1	0	0	0	0	3	2	4	4	4	5	0	0	0	1	0	2	0	0	0	0	5	1	3	16	0
758	17.5667	5.72686	0.527783	10.8508	0	0	8	16	6	15	5	16	13	22	13	25	8	5	5	9	1	6	4	0	0	1	1	0	8	0	4	9	2	10	0	0	0	0	0	5	0	1	1	4	7	0	2	14	1
759	13.4767	5.26829	0.540491	9.74723	0	0	5	11	4	14	4	12	12	31	7	19	4	7	4	9	3	3	3	1	0	1	1	0	7	0	2	8	7	9	0	0	0	0	0	2	0	1	1	4	11	1	3	12	0
760	15.1848	5.17294	0.51833	9.98001	0	0	1	9	5	16	5	11	17	19	10	24	7	5	8	7	7	4	7	0	0	2	1	1	7	0	3	4	3	13	1	0	1	2	0	3	0	0	1	2	8	0	2	16	3
761	19.8424	5.66886	0.571729	9.91528	0	0	7	14	2	6	6	7	13	23	16	23	10	9	3	10	6	2	8	0	2	0	0	1	6	1	4	11	4	6	0	0	0	2	1	2	0	0	0	2	5	0	1	18	1
762	14.8666	5.28442	0.529685	9.97652	0	0	7	10	3	12	3	18	23	35	8	15	6	4	7	7	2	5	5	1	1	1	1	0	6	1	5	9	2	9	0	0	0	0	0	3	0	1	0	3	5	0	5	9	0
768	12.2701	5.35769	0.521019	10.2831	0	0	9	15	2	18	3	8	13	27	7	12	6	5	9	8	6	4	5	1	0	0	0	0	8	0	3	7	1	9	0	0	0	1	0	2	0	1	1	2	4	0	1	14	1
769	14.7243	5.41943	0.542549	9.98883	0	0	7	10	3	11	4	17	12	21	10	21	10	4	9	6	7	3	4	2	0	0	1	2	11	2	1	14	0	4	0	0	0	1	0	2	0	0	0	1	2	1	2	14	0
770	20.9248	5.85734	0.566189	10.3452	0	0	6	10	2	14	3	11	16	25	17	23	6	9	5	7	5	4	9	0	1	0	0	0	3	0	1	11	3	6	1	0	1	2	0	3	0	0	0	5	5	0	4	22	1
772	13.7738	5.19156	0.56234	9.23207	0	0	3	11	3	11	9	15	14	25	8	20	8	6	9	10	2	2	1	1	0	0	0	2	3	4	2	12	2	7	1	1	1	0	0	0	0	0	0	4	3	0	4	10	0
773	17.7587	5.45524	0.515219	10.5882	0	0	6	12	4	12	9	17	13	25	14	12	4	9	4	7	7	2	9	1	0	1	2	0	5	1	4	9	4	5	0	1	0	1	0	4	0	0	0	3	8	0	2	15	0
774	16.6318	5.59116	0.57723	9.68618	0	0	5	8	4	18	4	12	13	28	12	16	11	10	7	7	1	2	6	0	1	1	0	3	9	0	3	14	8	7	0	0	0	1	0	0	0	0	0	1	2	0	2	19	0
775	19.1996	5.77529	0.572321	10.091	0	0	9	23	7	13	9	7	19	19	16	14	3	7	8	6	7	4	9	0	0	0	2	1	8	1	3	13	9	6	0	0	0	1	0	0	0	0	0	5	7	0	2	19	4
776	13.898	5.36115	0.528934	10.1358	0	0	4	11	4	16	3	8	21	23	8	22	6	8	7	6	3	3	7	0	0	0	0	1	8	0	1	8	7	5	0	0	0	0	0	5	1	1	0	2	8	0	3	12	0
777	16.8016	5.693	0.569539	9.9958	0	0	5	16	4	18	4	8	22	17	12	24	1	10	6	4	9	3	8	0	1	0	0	1	7	0	5	13	4	8	0	0	0	0	0	3	0	0	2	0	5	0	3	19	0
779	13.4329	5.20107	0.543445	9.57056	0	0	4	14	2	15	2	9	11	14	10	14	9	8	3	3	4	4	10	0	1	0	1	2	4	1	5	11	2	7	1	0	0	0	0	2	0	1	1	3	2	0	4	9	2
780	13.5649	5.31972	0.544019	9.77856	0	0	3	6	2	11	5	15	22	27	8	12	8	2	4	7	4	5	5	1	0	1	0	1	8	0	0	5	4	12	0	0	0	1	0	1	0	0	0	1	9	1	1	13	0
781	11.8818	5.05607	0.551981	9.15987	0	0	7	14	0	18	2	5	13	14	7	21	5	8	3	6	7	3	4	0	0	2	0	0	5	1	2	16	3	4	1	0	0	1	0	1	0	1	0	0	6	1	2	12	1
782	12.5842	5.59508	0.572754	9.76872	0	0	5	7	4	9	1	10	14	18	9	17	3	8	8	2	5	3	9	0	0	0	0	0	7	1	0	8	5	5	0	0	1	0	0	2	0	0	0	0	8	0	1	9	1
783	12.8898	5.19903	0.509395	10.2063	0	0	18	9	1	12	7	10	22	15	8	19	10	9	6	7	4	0	9	1	0	0	0	1	9	0	3	9	3	3	0	1	0	0	0	5	0	0	1	2	5	0	5	11	0
784	18.6497	5.57283	0.5559	10.0249	0	0	8	4	4	11	4	12	16	20	16	14	7	11	6	7	5	2	3	1	0	0	0	0	6	0	2	10	4	7	1	0	0	1	0	1	0	0	0	1	8	0	4	17	2
785	13.8629	5.05719	0.541203	9.34436	0	0	6	12	4	16	3	10	10	16	10	18	10	4	3	8	5	2	7	1	2	3	0	2	5	1	3	12	6	6	0	0	0	2	0	3	0	1	0	2	3	0	2	14	2
786	15.6362	5.67696	0.573732	9.89479	0	0	5	9	1	6	5	10	16	14	13	18	4	2	11	4	4	2	7	0	1	0	0	1	4	1	0	4	5	7	0	0	0	1	0	2	0	0	1	2	8	0	1	15	0
787	11.7557	4.64117	0.526913	8.80823	0	0	5	9	1	5	4	10	17	21	6	18	3	5	4	5	4	2	8	2	1	0	1	2	8	0	4	6	5	6	1	0	0	0	0	2	0	0	0	4	7	1	4	17	2
788	11.9938	5.04189	0.545902	9.23589	0	0	4	7	3	10	3	11	10	19	8	18	5	11	11	5	13	1	5	0	1	1	2	0	6	1	5	9	2	3	0	0	0	0	0	1	0	0	0	3	9	0	3	15	2
789	16.9444	5.43232	0.558296	9.73018	0	0	2	8	4	7	6	8	14	17	14	15	8	10	2	3	1	5	5	1	0	0	1	1	6	2	1	10	5	11	1	0	1	1	0	3	0	0	1	0	4	1	4	16	2
801	11.6822	4.55288	0.503439	9.04355	0	0	6	6	5	12	4	10	12	18	7	15	2	5	7	11	4	4	7	0	0	0	1	1	4	1	4	17	5	6	1	0	0	1	0	7	0	1	1	5	5	1	1	16	1
803	14.8683	5.52741	0.586437	9.42541	0	0	4	14	1	11	5	11	9	21	11	20	2	7	8	6	3	4	6	0	0	0	0	0	8	2	4	14	3	6	0	0	0	0	0	10	0	0	0	2	7	0	0	17	2
807	8.64547	4.46114	0.513636	8.6854	0	0	5	7	2	13	5	12	10	14	4	14	8	6	6	3	9	4	4	0	2	0	0	1	3	0	7	8	3	9	0	1	0	0	0	7	0	0	0	2	6	1	0	14	1
809	15.1937	5.33813	0.544417	9.80521	0	0	4	9	6	8	4	8	8	18	13	11	6	10	9	6	1	4	8	0	2	1	0	0	9	0	2	11	3	5	0	0	0	0	0	8	1	0	0	2	3	0	3	16	1
810	10.826	4.35445	0.515355	8.44942	0	0	2	1	3	8	5	14	5	18	7	15	10	5	9	4	10	7	4	0	1	0	1	2	5	1	5	9	1	10	1	1	0	1	0	7	0	0	0	2	7	0	3	22	2
813	8.5166	4.264	0.508393	8.3872	0	0	4	5	4	12	5	7	9	16	5	6	8	6	9	4	7	1	7	2	1	1	0	0	5	0	2	7	7	12	1	0	0	1	0	5	0	1	0	2	4	0	0	12	2
815	11.9309	4.45607	0.499048	8.92914	0	0	3	7	4	10	5	13	12	10	9	11	7	11	4	11	5	2	11	1	1	0	0	2	4	0	5	8	4	7	1	1	0	1	0	8	1	0	0	2	6	0	4	17	2
816	11.0976	5.00249	0.534549	9.35833	0	0	6	9	2	6	5	8	10	19	7	16	5	11	5	5	3	2	6	0	0	1	1	0	13	1	1	9	2	9	0	0	2	1	0	4	0	0	0	1	4	0	5	12	0
817	9.60632	4.80692	0.534876	8.98699	0	0	5	5	5	11	10	8	12	16	5	13	9	9	9	9	7	2	6	0	0	2	0	0	3	0	0	10	2	4	0	0	0	0	0	7	0	0	0	1	8	2	1	14	0
818	12.6586	4.98339	0.552156	9.02535	0	0	3	7	5	6	6	6	13	24	9	7	10	9	5	2	6	3	5	0	0	0	2	0	10	0	2	6	3	8	0	0	1	2	0	14	0	1	0	5	5	0	4	15	0
820	10.666	4.74915	0.511187	9.29043	0	0	7	6	5	6	8	4	11	14	7	19	4	8	7	5	4	1	7	0	0	0	1	0	6	0	3	17	3	5	1	0	1	0	0	7	0	1	0	5	4	0	1	11	1
821	11.574	4.50495	0.538006	8.37343	0	0	4	8	0	12	4	5	13	15	7	17	4	7	5	7	9	4	12	0	0	0	1	0	8	2	4	10	5	4	1	0	0	3	1	8	0	1	0	0	9	0	3	16	3
823	8.65472	4.40536	0.5241	8.40557	0	0	5	6	1	5	7	9	11	15	5	12	4	7	5	8	5	1	8	0	0	1	2	1	5	0	4	12	5	4	0	0	0	1	0	6	0	0	1	2	2	0	2	22	2
824	7.57389	3.92752	0.500279	7.85066	0	0	6	7	3	9	3	4	6	12	4	12	4	6	7	5	5	2	9	1	2	0	2	1	9	0	4	5	4	7	1	0	0	2	0	6	0	0	2	1	10	0	3	14	1
826	11.0582	4.61316	0.531313	8.68258	0	0	6	2	5	10	2	5	10	16	7	18	8	13	10	12	6	3	3	1	1	0	0	0	10	1	4	7	1	8	2	0	0	0	0	9	0	0	2	0	8	0	1	13	2
827	9.39104	4.59997	0.522926	8.79659	0	0	7	7	3	11	7	7	10	12	6	13	6	6	4	6	6	1	2	0	2	0	1	1	6	0	0	8	7	6	0	0	0	3	0	6	0	1	0	1	7	0	1	7	2
830	6.50331	3.56862	0.514465	6.93657	0	0	8	5	3	7	2	6	7	11	3	10	7	5	10	8	5	3	2	2	0	0	0	0	6	0	6	10	3	9	0	0	0	0	0	8	0	0	0	1	9	0	1	12	2
831	6.44709	3.87742	0.507779	7.63604	0	0	4	4	5	3	5	5	9	16	3	6	7	4	2	5	5	4	7	1	0	0	0	0	9	0	5	16	2	6	0	0	0	3	0	1	0	1	0	4	8	0	1	11	1
832	10.0613	4.3952	0.534897	8.21692	0	0	7	2	2	7	5	8	9	14	7	10	4	8	10	4	9	3	7	0	0	0	1	1	4	1	4	11	6	10	0	0	1	0	0	9	0	0	0	3	2	1	2	14	0
833	13.7234	4.99632	0.554219	9.01506	0	0	9	7	4	8	5	5	9	14	12	7	5	9	3	6	6	2	1	0	0	1	0	1	6	0	6	11	3	9	0	0	0	2	0	8	1	0	0	3	5	0	2	13	0
834	9.03455	4.20495	0.519917	8.08773	0	0	4	3	1	8	6	4	5	16	6	9	5	9	9	8	6	3	11	1	0	0	1	2	3	1	2	11	0	8	0	0	0	0	0	4	1	1	1	0	9	0	1	9	3
836	7.86824	3.90179	0.49669	7.85558	0	0	9	5	4	3	5	7	5	16	4	13	5	7	8	8	4	5	6	1	1	0	1	1	10	0	2	11	4	3	0	0	0	1	0	9	0	1	2	3	2	0	4	22	1
837	7.387	3.45786	0.523339	6.6073	0	1.42428e-10	7	1	4	4	3	3	4	10	4	13	5	8	7	10	10	2	6	0	2	0	0	1	4	0	1	7	4	8	0	0	0	2	0	4	0	1	2	2	6	1	0	10	1
838	9.93332	4.51952	0.537449	8.40921	0	0	3	6	2	6	3	8	4	11	8	10	5	10	6	2	7	4	3	1	0	0	1	2	5	1	4	7	1	4	1	0	0	1	0	5	0	0	0	0	3	0	2	13	0
839	7.99461	4.08295	0.562029	7.26467	0	0	4	1	2	4	4	1	6	9	6	11	7	9	8	6	7	2	8	0	0	0	0	0	7	0	6	12	2	9	0	0	0	0	0	5	0	1	1	7	6	0	1	18	1
840	6.66689	4.05406	0.474189	8.54946	0	0	8	4	2	8	6	7	13	13	2	15	4	10	5	7	5	4	7	1	2	0	0	1	9	0	1	5	4	9	0	0	1	0	0	6	0	0	0	2	8	0	1	19	1
841	9.34155	4.5323	0.52475	8.63706	0	0	9	3	2	13	4	6	5	14	6	16	4	7	10	5	4	0	4	1	1	1	2	1	4	1	3	13	2	3	0	0	0	0	0	5	0	0	0	3	5	0	3	15	1
842	9.96772	4.7528	0.546813	8.69182	0	0	8	5	5	4	4	5	13	15	7	8	7	8	4	2	12	1	7	0	1	0	0	1	9	1	1	15	5	5	0	0	0	1	0	6	1	0	1	2	6	0	0	14	0
843	8.46426	4.21843	0.535942	7.87105	0	0	5	4	4	8	2	6	5	5	6	18	3	10	12	12	8	4	6	1	0	0	0	1	2	0	4	10	6	9	0	0	0	0	0	4	0	1	1	0	4	0	3	13	0
844	7.08196	3.84731	0.519634	7.40388	0	0	5	7	4	12	1	4	8	11	3	12	3	4	8	7	7	3	7	1	2	0	1	1	2	0	4	12	8	10	0	0	0	1	1	6	0	1	1	1	6	0	1	21	0
846	7.21624	3.90663	0.498992	7.82905	0	0	8	4	7	7	5	4	7	10	4	12	8	6	2	8	6	3	2	0	1	0	1	1	7	0	3	6	5	5	0	0	0	2	0	3	0	0	1	2	8	0	6	10	0
847	9.73346	4.18169	0.513922	8.13682	0	0	4	4	2	11	5	4	11	8	7	11	4	10	6	8	5	4	9	0	0	1	0	0	9	1	6	7	4	6	1	0	1	1	0	2	0	0	0	1	6	0	2	19	2
848	6.72511	3.96855	0.461806	8.59356	0	0	10	6	6	4	8	5	9	12	3	12	6	8	9	6	4	4	5	0	0	0	0	1	4	0	3	10	3	5	0	0	0	2	0	4	0	0	0	3	4	0	2	12	1
849	5.68671	3.67603	0.53528	6.86749	0	0	4	3	2	4	3	6	5	12	2	9	6	6	6	7	10	1	6	0	1	0	0	1	6	1	8	10	2	5	0	0	1	0	1	3	0	0	0	4	4	1	1	15	1
850	7.27402	4.04931	0.525681	7.70297	0	0	4	5	5	2	4	7	4	13	4	13	5	8	3	8	5	3	5	0	0	1	0	1	3	0	4	9	5	3	1	1	1	0	0	8	1	1	0	3	1	0	1	16	0
851	8.32878	4.26179	0.501965	8.49022	0	0	9	6	4	6	4	8	7	15	5	10	6	2	11	7	2	5	8	0	0	1	1	0	7	2	5	14	3	5	1	0	0	1	0	4	0	0	0	2	10	0	0	15	0
852	8.35701	4.20318	0.525084	8.00479	0	0	4	5	2	8	5	8	12	13	5	8	3	6	8	7	9	3	5	0	0	1	2	2	9	3	2	8	6	5	1	0	1	1	0	3	0	0	0	1	9	0	6	16	1
853	9.91577	4.73683	0.524152	9.03712	0	0	5	3	4	8	7	4	7	16	7	11	8	7	7	8	3	1	3	0	1	0	2	0	9	1	3	10	6	6	1	0	0	0	0	6	0	1	0	1	3	0	2	12	0
854	8.31533	4.39595	0.55377	7.93823	0	0	3	5	1	3	3	6	7	16	5	12	9	11	5	8	8	4	6	0	0	1	0	1	7	0	3	6	2	9	0	0	0	2	0	4	0	0	0	2	3	0	5	16	4
855	9.26059	4.30517	0.523132	8.2296	0	0	7	3	5	10	5	7	9	11	7	6	4	6	11	4	11	2	8	0	0	1	1	0	7	1	3	13	1	7	0	0	0	2	0	3	0	1	1	4	5	0	0	16	1
856	8.72829	3.99345	0.52359	7.62705	0	0	5	3	4	3	5	13	7	6	7	6	3	12	6	5	5	1	7	0	1	0	2	1	6	0	0	10	5	7	0	0	0	0	0	8	0	1	2	1	6	1	1	14	1
858	7.50315	3.83978	0.538536	7.13003	0	0	4	6	2	8	1	4	7	12	5	4	4	9	7	3	3	5	4	0	2	0	1	1	6	0	5	10	1	5	0	0	0	0	0	5	0	0	0	2	4	0	4	23	1
859	8.91552	4.37596	0.507021	8.63074	0	0	10	4	1	3	7	7	13	13	5	16	5	7	4	6	10	1	4	1	0	1	0	1	7	0	4	12	4	5	0	0	0	1	0	3	2	0	0	3	5	0	1	16	1
860	7.97012	4.26933	0.496699	8.5954	0	0	5	3	5	9	6	9	8	10	5	13	5	7	8	7	7	6	6	0	1	0	0	1	5	0	2	4	4	5	0	0	0	1	0	6	0	1	0	3	4	0	2	9	2
861	9.39492	4.46809	0.547596	8.15945	0	0	6	2	3	5	2	5	9	6	7	18	6	4	4	7	3	1	6	2	0	0	0	0	4	1	1	11	3	12	0	0	0	1	0	4	1	1	0	2	1	0	1	14	2
862	9.35135	4.02002	0.519526	7.73785	0	0	4	2	8	6	5	4	9	14	6	11	2	6	8	11	10	4	3	1	0	1	0	0	10	1	5	7	6	2	1	0	0	0	0	5	1	0	0	2	5	0	4	12	4
863	9.28853	4.39307	0.5224	8.40939	0	0	7	12	3	5	6	6	8	19	6	4	10	9	8	10	7	2	4	0	0	0	0	1	7	0	7	9	4	5	1	0	0	1	0	3	0	0	0	3	3	0	1	17	2
864	6.81967	3.72057	0.496555	7.49278	0	0	7	6	1	8	7	9	8	7	4	8	4	6	8	7	3	1	5	0	0	1	0	0	2	1	7	10	3	5	0	0	0	1	0	2	0	1	2	3	5	0	3	14	2
865	4.93272	3.41323	0.485747	7.02677	0	0	7	6	1	6	4	5	8	11	1	10	4	8	6	8	7	1	10	2	1	0	0	4	6	0	1	10	3	5	0	0	0	1	0	6	0	0	0	2	7	0	2	14	1
866	7.69143	4.17404	0.537181	7.77027	0	0	0	7	4	6	3	4	7	12	5	8	9	6	6	8	5	1	7	0	0	0	1	0	5	0	3	8	3	2	1	0	0	0	0	3	0	1	0	4	5	0	2	18	1
867	8.62206	3.92795	0.50835	7.72686	0	0	4	1	6	10	3	6	3	10	6	12	8	7	9	11	5	4	4	2	1	0	1	1	6	0	2	6	9	8	0	0	1	1	0	0	1	0	0	1	5	0	1	14	1
868	7.0482	3.53279	0.511686	6.90421	0	0	4	2	6	4	4	7	8	10	3	12	4	7	8	7	5	1	6	1	1	0	0	1	10	0	3	13	5	5	0	0	2	0	0	5	0	0	1	1	5	2	2	17	2
869	5.97308	3.31613	0.482066	6.87899	0	0	4	3	3	3	2	6	7	8	3	11	5	8	7	4	5	5	5	0	2	0	0	1	9	1	2	12	2	8	1	0	0	0	0	8	0	0	0	4	5	0	4	18	1
870	5.51485	3.54174	0.470504	7.52756	0	0	8	7	1	5	7	6	12	6	2	10	8	5	11	4	6	4	7	1	0	2	1	1	9	0	1	12	2	8	0	1	0	2	0	4	0	0	1	0	6	0	4	14	1
872	7.60009	3.87227	0.487559	7.94216	0	0	5	2	8	6	9	6	5	14	4	10	9	6	11	8	7	4	3	2	1	0	2	0	5	1	3	10	2	9	1	0	0	0	0	4	0	0	1	0	3	1	4	12	1
873	6.52445	3.87115	0.524602	7.37922	0	0	4	5	2	7	5	6	9	8	4	7	5	5	9	2	4	3	2	0	0	0	0	2	4	0	3	12	3	9	1	0	0	0	0	4	0	0	1	2	3	0	4	18	1
876	6.13101	3.44007	0.509775	6.74822	0	0	4	7	2	4	7	8	3	8	3	9	6	8	6	3	7	3	10	2	2	0	1	3	5	0	0	6	6	4	0	0	1	0	1	2	1	0	0	1	5	0	2	15	0
878	8.73391	4.06353	0.542677	7.48793	0	0	3	4	4	1	4	4	10	12	6	9	5	10	10	7	6	5	6	2	0	0	1	0	10	0	3	11	4	15	0	0	0	2	0	3	0	0	0	4	5	0	0	11	1
879	6.85496	3.8566	0.529665	7.2812	0	0	5	3	3	8	1	7	5	6	5	8	5	6	5	9	5	4	5	1	0	0	1	0	6	0	2	10	2	9	0	0	0	0	0	2	1	1	0	1	7	0	1	12	0
880	6.19353	3.73068	0.526195	7.08992	0	0	2	5	2	8	10	7	3	9	4	6	2	8	5	5	2	1	9	2	0	2	0	0	6	1	2	11	9	5	0	0	0	0	0	8	0	1	0	2	4	0	5	12	0
881	7.70254	3.64658	0.527629	6.91125	0	0	7	5	6	2	2	8	5	6	6	8	4	5	12	5	5	2	3	3	0	1	0	1	5	0	2	7	4	7	0	0	0	2	0	2	0	0	0	4	2	0	2	19	3
882	5.3436	3.3367	0.523706	6.37132	1.8741e-10	6.58612e-10	2	7	1	5	7	5	6	7	2	9	5	7	4	5	9	3	5	0	1	1	0	0	2	1	0	10	2	9	0	0	1	1	1	2	1	0	0	5	3	0	4	23	0
883	7.24243	3.69054	0.512211	7.20512	0	0	3	6	4	7	8	8	9	5	5	7	2	11	6	1	4	3	9	0	0	0	0	0	10	0	2	8	6	5	0	0	0	0	0	3	1	1	0	0	3	0	5	19	2
884	8.57789	3.8039	0.518391	7.3379	0	0	2	2	6	3	5	8	5	8	6	11	5	16	8	7	5	1	6	0	1	0	2	0	10	1	2	10	4	9	0	0	1	0	0	1	0	0	2	3	5	1	2	10	1
885	8.17998	3.90065	0.531027	7.34548	0	0	1	4	4	7	5	4	4	10	6	7	2	11	11	3	5	6	7	0	0	0	0	0	12	2	6	7	3	6	0	0	0	2	0	2	0	0	0	1	8	1	3	11	1
886	6.79422	3.22097	0.504955	6.37873	1.78563e-10	6.3113e-10	8	3	3	8	5	4	5	3	5	7	4	9	10	6	5	2	5	0	0	2	0	3	5	0	2	6	3	8	1	0	0	1	0	1	0	0	2	2	6	0	2	15	1
888	7.91585	3.84708	0.531119	7.24335	0	0	6	3	2	6	3	5	4	5	6	14	7	4	4	10	7	2	3	1	0	1	1	0	7	0	2	7	2	9	0	0	0	0	0	4	0	0	0	4	8	0	3	19	2
889	10.2109	4.51215	0.537864	8.38902	0	0	9	2	4	5	7	7	5	11	9	4	2	10	7	8	4	3	3	0	0	1	2	0	4	0	3	9	4	9	2	0	0	2	0	1	0	0	1	0	4	0	1	10	1
890	7.25583	3.82664	0.553303	6.91599	0	0	5	4	2	3	2	4	0	11	5	9	6	11	6	7	7	4	3	0	0	0	1	0	4	1	2	9	4	9	0	0	0	0	1	1	0	0	0	1	8	0	4	12	0
891	8.6685	4.36131	0.565425	7.71332	0	0	3	4	4	3	9	6	4	11	7	7	4	10	6	9	8	1	3	1	0	0	0	0	4	0	2	7	8	3	0	0	0	0	0	3	0	1	0	0	9	0	3	13	0
892	7.0918	3.60028	0.5043	7.13918	0	0	9	4	1	8	7	8	5	10	5	3	9	4	7	10	6	1	6	0	0	1	1	0	10	0	2	9	3	6	0	0	0	1	0	2	0	0	0	4	9	0	2	17	1
893	4.25691	3.07334	0.481722	6.37989	1.7721e-10	6.2815e-10	4	2	3	5	5	3	8	9	1	7	2	7	4	11	7	3	5	0	0	2	0	0	7	2	4	8	3	7	0	0	0	1	0	2	0	1	0	1	8	0	3	17	2
894	10.4023	4.48381	0.587954	7.62612	0	0	3	4	1	8	6	4	4	7	10	3	3	6	9	2	5	4	5	0	1	0	1	1	4	0	5	13	1	8	0	0	0	0	0	2	0	2	0	4	7	0	3	22	1
895	4.36328	3.59224	0.514962	6.97573	0	0	7	4	4	6	4	1	5	14	1	5	7	7	4	6	5	3	5	0	0	0	0	0	3	2	1	10	4	6	0	0	1	2	0	5	0	0	0	0	4	0	1	21	0
896	5.93807	3.36502	0.509921	6.59911	0	1.50075e-10	6	4	1	3	3	6	6	12	2	9	4	7	8	3	7	3	9	0	0	0	1	0	9	1	2	9	5	10	1	1	0	1	1	0	1	0	0	0	5	0	4	17	1
897	6.3697	3.93999	0.557473	7.06759	0	0	5	3	2	3	0	6	7	16	3	5	10	2	4	4	6	2	5	0	2	0	1	0	4	2	2	6	2	7	0	1	0	2	0	2	0	0	2	1	1	0	4	12	0
898	7.52699	3.65635	0.503629	7.26002	0	0	9	4	3	6	2	5	5	10	5	7	8	4	6	12	2	4	8	1	2	0	2	0	5	1	3	10	4	4	0	1	0	2	0	2	0	0	0	2	3	0	2	14	0
899	4.24147	2.88174	0.527463	5.46339	4.67123e-08	1.47702e-07	3	4	2	3	3	2	6	10	1	6	5	2	15	8	4	5	9	0	2	0	4	1	4	0	2	9	3	5	2	0	0	3	0	2	0	1	0	0	6	0	0	19	0
901	3.61579	2.42049	0.519732	4.6572	3.20546e-06	8.90003e-06	4	2	2	5	5	4	6	1	2	4	4	6	1	5	3	6	1	0	0	0	0	0	9	1	4	13	4	13	0	0	0	0	0	1	0	1	0	4	5	0	2	17	0
904	6.38542	3.37413	0.533407	6.32561	2.52234e-10	8.81385e-10	6	1	3	3	3	4	5	4	5	8	8	5	9	6	3	3	8	2	1	1	1	0	5	0	4	11	2	3	0	0	0	0	0	3	0	0	0	3	8	0	4	21	0
905	9.21672	4.26002	0.557987	7.63463	0	0	4	3	2	5	6	1	9	5	7	17	7	8	6	11	5	3	5	0	0	0	2	1	8	2	4	14	6	7	0	0	0	1	0	2	0	0	0	4	9	0	3	20	0
906	5.55297	3.47267	0.529285	6.56105	0	1.92726e-10	6	2	4	6	7	7	4	5	4	6	8	5	10	7	5	4	1	0	0	0	0	0	4	0	2	10	6	1	0	0	0	1	0	2	0	0	0	3	3	0	1	13	0
907	7.04459	3.63637	0.530429	6.85553	0	0	8	3	2	7	1	5	7	10	4	6	8	2	4	11	8	4	7	1	0	1	2	0	7	0	2	9	3	8	0	0	1	0	1	4	0	0	0	3	4	0	1	13	2
911	6.7443	3.24664	0.520674	6.23546	4.50444e-10	1.55195e-09	8	3	2	2	6	3	6	10	4	6	3	8	8	9	5	4	6	0	1	1	0	1	12	0	3	6	6	10	1	1	2	3	0	0	0	0	1	0	4	0	6	16	0
912	7.02953	3.66842	0.565957	6.48181	0	3.25951e-10	5	1	1	5	4	1	7	8	5	6	3	12	2	8	5	5	6	0	0	1	1	0	6	0	3	6	0	6	0	0	1	1	0	2	0	1	2	0	4	0	2	18	2
913	4.70047	2.81711	0.47266	5.96012	2.52052e-09	8.40173e-09	5	5	2	3	7	5	4	7	2	7	3	7	4	9	4	2	9	0	0	0	1	0	11	1	4	6	5	10	0	0	0	1	0	2	1	1	2	3	3	0	3	9	2
914	4.39397	2.59753	0.484904	5.3568	8.47099e-08	2.63904e-07	5	1	4	4	9	2	7	6	2	4	2	5	4	5	7	1	7	1	0	1	0	2	7	0	5	12	10	3	1	0	0	1	0	6	0	1	1	2	6	0	1	16	1
915	4.14307	2.63245	0.545029	4.82992	1.36585e-06	3.94366e-06	5	2	2	3	0	4	4	2	3	4	3	5	2	6	5	2	4	0	0	1	0	0	12	0	1	8	4	8	1	0	1	1	0	1	0	0	0	4	2	0	2	15	1
916	6.66555	4.05879	0.560649	7.23945	0	0	3	5	0	1	8	3	10	12	4	7	2	6	3	7	4	4	7	0	0	1	0	0	5	0	4	2	5	6	1	0	0	1	0	2	0	0	0	3	6	0	2	15	0
917	8.36955	3.72723	0.552142	6.75049	0	0	6	3	3	2	3	3	2	9	7	6	4	4	6	8	8	3	4	1	0	1	0	0	2	1	4	7	7	6	1	0	0	1	0	4	0	0	2	3	8	0	1	15	0
919	4.86321	2.57797	0.490801	5.25258	1.4998e-07	4.60039e-07	3	3	2	6	2	6	3	5	3	4	5	8	8	4	6	6	6	0	0	2	1	0	7	1	3	8	6	3	0	0	1	1	0	2	0	0	0	4	11	0	2	14	3
920	6.28802	3.54407	0.501723	7.06381	0	0	6	3	3	6	6	4	6	13	3	5	4	5	6	8	2	1	8	2	1	1	1	0	5	1	3	7	1	6	0	0	0	1	0	2	2	0	0	2	9	1	5	13	1
921	7.38493	3.4886	0.554595	6.29036	3.16724e-10	1.1036e-09	6	4	3	4	6	3	3	4	6	8	7	4	7	5	3	2	5	0	0	1	2	0	7	0	6	8	1	10	0	1	0	0	0	1	0	0	0	2	2	0	5	18	1
923	6.44765	3.70401	0.507712	7.29549	0	0	2	3	5	6	4	4	4	14	3	8	8	5	9	7	8	4	6	2	0	0	1	0	8	0	3	6	5	4	0	0	0	0	0	2	0	1	0	3	1	1	3	9	1
924	5.725	3.51849	0.544257	6.46476	1.01458e-10	3.6277e-10	3	2	1	2	8	4	4	6	4	8	5	6	4	8	2	1	5	0	1	1	0	1	6	0	4	6	4	4	1	0	0	0	0	4	0	0	1	1	6	0	4	12	1
927	4.56459	2.96771	0.585687	5.06706	4.04011e-07	1.21797e-06	4	1	0	0	5	2	4	10	3	1	1	5	5	11	5	1	5	0	0	0	0	0	6	1	3	9	4	7	0	0	0	1	0	2	0	0	0	1	4	0	3	17	0
929	5.12532	2.85118	0.543481	5.24614	1.55319e-07	4.7523e-07	7	2	1	2	8	3	3	3	4	6	4	4	11	1	4	5	4	0	1	0	2	1	10	0	2	12	6	12	0	0	0	2	0	0	0	0	0	2	8	0	1	17	0
930	2.62606	2.3125	0.479021	4.82755	1.38222e-06	3.98157e-06	2	6	1	2	1	5	2	7	0	5	2	5	8	6	7	3	9	1	0	0	0	1	6	0	3	8	3	5	0	0	0	0	0	2	0	0	2	2	7	0	5	14	1
931	3.32019	2.19195	0.459893	4.76621	1.8772e-06	5.35722e-06	4	1	3	4	2	3	4	5	1	3	7	10	3	8	5	2	8	1	0	1	1	0	4	1	3	6	3	8	1	1	0	1	0	2	0	0	1	4	7	0	1	19	2
932	4.75997	3.2564	0.520012	6.26216	3.79681e-10	1.31551e-09	4	2	5	6	1	3	8	10	1	8	4	4	7	7	1	2	5	0	0	0	1	0	7	2	6	2	3	10	0	0	1	1	1	2	0	0	1	0	12	0	3	16	0
933	6.60557	3.58613	0.562823	6.37169	1.86958e-10	6.58612e-10	8	3	5	4	5	1	7	8	5	2	2	7	7	10	2	2	7	1	0	1	0	0	7	0	0	4	5	11	0	0	1	1	0	4	0	0	0	4	4	0	1	21	2
934	4.16859	2.84364	0.493946	5.75699	8.56287e-09	2.80862e-08	7	4	3	3	4	2	3	9	2	2	6	2	6	3	3	2	7	0	2	0	0	1	6	0	3	13	2	7	1	0	1	0	0	2	0	0	0	0	4	0	1	16	1
935	5.50292	3.36412	0.558485	6.02365	1.70526e-09	5.71518e-09	2	8	1	1	6	3	5	4	4	6	5	4	12	7	8	1	7	0	1	0	1	0	5	0	4	8	1	2	0	0	0	1	0	2	1	0	0	0	7	0	1	15	1
936	5.92682	3.49842	0.532843	6.56558	0	1.8751e-10	5	4	3	4	4	1	4	6	4	9	2	4	8	7	1	1	7	0	1	0	0	0	7	0	5	6	2	6	1	0	0	0	0	1	0	0	2	3	3	0	2	9	1
937	2.84285	2.45473	0.47672	5.1492	2.61594e-07	7.94471e-07	5	1	4	4	5	5	1	5	1	5	6	5	7	7	5	0	6	0	0	2	2	1	7	0	3	8	4	7	0	0	0	0	0	0	0	0	0	3	3	0	4	10	1
939	5.67945	3.71411	0.53949	6.88448	0	0	3	3	1	6	3	6	2	7	4	8	3	7	11	4	3	2	4	0	1	0	0	0	12	1	4	7	2	3	0	0	0	0	0	2	0	0	0	1	7	0	2	16	0
940	4.44633	2.59841	0.515013	5.04534	4.52715e-07	1.36147e-06	5	2	2	5	2	2	1	3	3	7	5	5	8	7	5	5	10	1	0	1	0	0	2	1	1	9	4	2	0	0	0	1	0	3	0	0	1	4	6	0	3	15	0
942	4.85983	3.24872	0.526202	6.17391	6.66226e-10	2.27627e-09	3	1	4	4	1	1	4	4	3	11	4	6	8	7	7	2	6	1	0	2	0	1	4	1	1	10	4	4	0	0	0	0	0	5	0	0	0	1	5	0	1	11	1
943	3.29233	2.28305	0.48674	4.69049	2.72547e-06	7.65372e-06	3	3	3	2	2	2	5	2	1	9	2	5	6	3	8	5	3	1	0	2	1	0	7	0	5	4	3	5	0	0	0	0	0	2	1	0	0	4	8	0	1	15	4
944	6.42963	3.50772	0.58418	6.00452	1.91895e-09	6.41387e-09	0	3	2	6	0	8	5	3	5	6	4	8	5	6	0	3	9	0	1	0	0	2	2	1	1	11	1	6	0	1	1	1	0	6	0	0	0	3	5	0	6	11	1
945	3.82686	3.18038	0.478939	6.64046	0	1.1413e-10	3	2	5	2	2	5	3	10	1	8	8	5	4	5	3	2	7	0	0	0	1	0	4	1	1	9	3	6	1	0	1	1	0	1	0	0	0	2	8	0	1	17	0
947	5.22847	2.29006	0.554066	4.13319	3.57764e-05	8.9079e-05	3	0	4	3	3	3	3	2	4	4	6	1	6	4	2	4	7	2	1	0	0	0	8	0	3	6	1	6	0	0	2	0	0	3	0	1	3	1	9	0	1	18	1
948	3.77963	1.74288	0.501937	3.4723	0.000516012	0.0011019	5	1	3	2	4	2	2	3	2	4	2	4	6	11	2	5	13	1	1	2	1	0	9	1	2	12	4	4	0	2	0	0	0	2	0	0	1	5	7	0	1	18	1
949	3.65384	2.85378	0.483333	5.90438	3.5397e-09	1.17354e-08	4	3	3	4	4	8	2	7	1	6	4	3	9	4	5	0	6	0	0	0	1	2	3	0	1	6	5	6	0	1	0	2	0	1	2	1	0	1	6	0	1	9	1
950	5.14319	2.85403	0.518803	5.50119	3.77243e-08	1.2021e-07	4	2	2	1	6	5	3	7	3	6	3	6	4	4	6	1	8	0	1	2	1	2	6	0	2	6	2	1	0	0	0	1	0	1	0	0	2	4	9	0	3	15	1
951	5.67356	3.01259	0.529264	5.69204	1.25532e-08	4.08476e-08	6	2	3	4	7	2	5	6	4	4	4	1	7	14	6	2	7	0	1	1	0	0	8	0	4	8	3	7	0	0	0	1	0	1	0	0	2	2	4	0	2	12	3
952	4.94333	2.65105	0.567253	4.67349	2.96129e-06	8.29701e-06	3	0	2	2	1	4	3	6	3	5	4	6	5	5	6	3	8	0	0	2	0	0	4	2	5	5	6	6	0	0	0	0	0	2	0	0	0	0	6	1	2	20	4
953	3.26352	3.01574	0.482795	6.24641	4.19985e-10	1.45107e-09	6	3	4	3	4	4	3	8	1	5	3	4	8	2	9	3	4	0	0	0	0	0	7	1	2	8	1	4	0	0	0	0	0	4	0	0	1	1	3	0	1	13	1
954	5.73164	3.39944	0.53434	6.36194	1.99224e-10	6.98137e-10	4	3	3	4	2	4	2	9	4	5	5	7	8	7	9	4	3	0	1	1	1	2	7	1	1	12	1	8	0	0	0	0	0	1	0	0	0	6	1	0	2	10	1
955	4.70977	3.16563	0.516902	6.12425	9.11116e-10	3.09578e-09	6	1	3	6	4	4	1	9	3	2	7	6	7	5	4	0	5	1	0	0	2	1	1	1	1	5	7	2	0	0	0	0	0	4	1	0	0	1	3	0	1	8	3
956	4.80871	3.01899	0.543021	5.55962	2.7036e-08	8.72817e-08	2	2	0	6	4	4	2	8	2	7	4	6	7	7	4	1	2	0	1	1	0	0	3	2	4	13	4	9	0	0	1	2	1	4	0	0	0	2	3	0	2	15	2
958	3.12328	2.21254	0.556731	3.97416	7.06275e-05	0.000169671	4	1	1	4	3	0	3	4	1	4	0	5	5	3	4	0	5	0	0	0	3	0	5	0	2	8	3	4	0	0	0	1	1	1	0	0	1	3	5	0	1	15	0
959	5.03794	2.95297	0.592477	4.9841	6.2251e-07	1.84949e-06	4	3	1	2	6	0	4	7	3	3	2	4	4	7	7	0	2	0	3	1	1	1	6	0	0	7	2	3	0	0	0	1	1	3	0	0	0	2	6	0	0	17	1
960	4.27665	2.93878	0.497664	5.90515	3.52335e-09	1.17128e-08	4	4	3	3	2	3	4	8	2	5	5	8	6	5	5	5	1	0	0	0	3	0	3	0	2	6	9	6	0	0	0	0	0	5	0	0	0	2	7	0	2	13	2
963	1.83632	1.52348	0.468479	3.25197	0.00114608	0.00231855	3	2	2	3	3	4	2	2	0	3	4	2	4	6	4	1	3	0	0	0	0	1	2	3	3	4	2	8	0	1	1	1	0	4	0	0	0	0	10	0	2	13	1
964	3.32991	2.45814	0.507315	4.8454	1.26354e-06	3.68283e-06	4	2	2	1	1	2	3	6	1	6	5	7	8	4	5	2	6	0	1	1	0	2	2	1	0	8	2	5	0	0	1	1	0	5	2	1	0	2	2	0	0	19	1
965	3.4971	2.39747	0.493786	4.85528	1.20219e-06	3.51234e-06	2	0	1	3	4	5	5	4	1	8	2	5	7	10	3	2	4	0	0	0	1	0	7	1	1	8	2	14	1	0	1	2	0	2	0	0	1	3	2	0	4	17	1
966	3.78708	2.63076	0.563374	4.66965	3.01717e-06	8.39619e-06	4	2	1	0	2	4	2	4	2	8	1	5	7	5	3	0	5	1	0	2	1	0	10	1	3	7	1	9	1	0	1	1	0	3	0	0	0	5	2	0	2	19	0
967	6.51624	2.77908	0.544971	5.09951	3.4053e-07	1.02912e-06	7	1	4	5	8	5	1	4	5	5	4	4	10	12	3	3	6	0	2	0	1	0	7	0	3	6	3	5	0	0	0	2	1	2	0	0	0	0	9	0	4	24	2
968	5.42765	2.89606	0.520968	5.559	2.71326e-08	8.73641e-08	3	0	3	5	3	3	3	4	4	7	2	4	9	3	9	3	3	1	0	1	2	0	8	2	1	6	2	6	0	0	0	0	0	7	0	1	0	2	5	0	1	8	0
970	4.22783	2.32599	0.536427	4.33607	1.4505e-05	3.75604e-05	1	2	2	2	2	1	4	7	2	3	7	5	5	6	7	3	10	1	2	1	2	0	8	2	2	8	7	6	1	0	0	0	0	1	0	0	3	3	6	0	5	20	1
971	4.58787	2.66738	0.542152	4.91999	8.65497e-07	2.5529e-06	2	2	4	2	2	2	3	6	3	4	1	4	8	5	8	0	10	1	2	2	1	2	5	0	2	11	5	6	0	0	1	0	0	1	0	0	0	2	4	0	2	13	1
972	6.59025	3.2764	0.55545	5.89865	3.66498e-09	1.21181e-08	7	1	3	3	3	4	4	6	5	5	3	6	6	8	8	1	10	0	1	1	0	3	3	0	2	6	4	5	0	1	0	1	0	1	1	0	0	1	7	0	2	15	0
973	3.5363	2.10602	0.491016	4.2891	1.79395e-05	4.6066e-05	5	3	0	3	4	2	3	6	1	3	4	4	4	7	9	3	3	1	1	1	1	1	6	2	3	5	5	5	0	0	0	0	1	4	1	0	0	3	2	0	1	19	2
974	3.60442	2.08569	0.545876	3.82081	0.000133015	0.000305809	3	1	1	5	6	1	2	3	2	3	3	1	5	10	4	3	4	0	0	0	0	0	2	1	2	7	2	5	0	0	0	2	0	3	0	2	0	0	7	1	2	17	1
978	4.69829	3.21561	0.591409	5.43721	5.41227e-08	1.70695e-07	2	1	3	3	0	2	5	10	2	6	1	8	7	3	2	2	1	1	1	2	1	1	0	0	3	7	5	2	0	0	0	1	0	6	0	0	2	3	0	0	1	12	2
979	2.90892	2.18475	0.476073	4.58911	4.45132e-06	1.2194e-05	4	1	5	4	3	5	4	4	1	3	7	1	9	6	5	3	4	0	1	0	4	1	8	0	6	4	4	3	0	0	0	0	0	6	0	0	0	3	4	0	0	16	1
981	4.27341	2.77159	0.542641	5.10759	3.26286e-07	9.88503e-07	3	3	2	2	3	6	3	5	3	3	1	1	8	10	9	4	4	0	1	1	0	0	6	0	0	12	2	4	0	0	0	1	0	2	0	0	0	1	6	0	1	9	0
982	4.15897	2.99914	0.547381	5.47908	4.27532e-08	1.35882e-07	3	2	3	4	5	2	2	6	3	2	6	6	6	3	6	1	9	0	0	1	1	0	9	0	3	3	4	8	0	0	0	0	0	5	0	0	0	1	1	0	2	11	0
983	5.27252	2.61299	0.556843	4.6925	2.69887e-06	7.59637e-06	3	1	1	3	4	3	2	6	4	2	3	4	5	6	9	4	5	1	1	0	0	0	8	0	3	8	1	5	1	0	1	0	0	1	0	0	0	3	2	0	2	16	0
984	4.57347	2.47329	0.54206	4.56276	5.04851e-06	1.37382e-05	4	0	3	3	6	1	3	4	3	4	2	7	9	4	3	1	5	0	0	0	1	0	5	1	6	9	2	4	1	0	0	0	0	6	0	0	1	1	3	1	3	20	2
985	3.96624	2.34629	0.490409	4.78435	1.71541e-06	4.91831e-06	2	4	3	3	5	1	2	6	2	4	2	7	9	8	1	4	6	2	0	0	1	1	2	1	3	9	5	5	0	0	0	1	0	4	0	0	0	2	6	0	5	17	2
986	5.06966	2.44623	0.555928	4.40026	1.08119e-05	2.8295e-05	9	0	3	4	5	2	0	3	4	5	3	3	7	8	3	5	5	2	0	0	1	1	6	1	1	9	5	4	1	0	1	0	0	7	0	0	0	2	4	0	1	18	0
987	6.97693	3.31774	0.587866	5.6437	1.66431e-08	5.40133e-08	4	2	5	1	3	3	3	5	6	5	2	2	10	5	3	3	7	0	4	0	0	0	3	0	0	7	0	7	0	0	0	0	0	4	0	0	0	3	2	0	1	12	1
988	2.6993	1.11886	0.504275	2.21876	0.0265032	0.0431203	2	2	1	2	3	1	0	3	1	4	3	5	7	1	6	5	5	0	0	3	2	1	17	0	4	8	4	3	0	0	0	1	0	7	0	2	1	2	4	0	3	21	1
989	2.64153	2.15123	0.473002	4.54803	5.41512e-06	1.46387e-05	4	3	5	3	2	2	7	4	0	3	3	5	7	6	2	3	9	0	0	1	2	0	3	1	4	8	2	4	1	0	0	0	0	2	0	3	0	2	11	0	1	16	0
990	4.67653	2.40426	0.523418	4.59338	4.36125e-06	1.1974e-05	3	6	3	3	1	3	2	2	3	6	3	7	4	4	5	1	7	0	2	1	1	0	5	0	2	8	3	1	0	0	0	1	0	4	0	1	0	2	6	0	6	21	2
991	4.48445	2.19888	0.532292	4.13097	3.61235e-05	8.95803e-05	3	1	2	2	2	0	5	2	3	3	5	9	7	2	4	3	6	1	0	1	0	2	6	0	1	7	5	5	0	2	0	1	0	4	0	0	1	1	6	0	4	15	0
992	5.33565	2.38062	0.545507	4.36406	1.27673e-05	3.32003e-05	4	0	7	2	4	1	3	4	4	3	4	3	8	14	6	2	3	0	0	1	0	0	5	0	5	5	3	8	0	0	1	0	1	6	0	0	0	3	8	0	2	16	1
995	4.34313	2.44198	0.566534	4.31038	1.62971e-05	4.2024e-05	5	2	1	6	3	1	2	4	3	2	4	3	7	9	1	0	3	0	1	1	2	1	3	0	2	11	0	8	0	0	0	2	0	0	1	0	1	1	5	0	2	19	0
996	2.48222	2.2647	0.516246	4.38686	1.15001e-05	3.00321e-05	6	0	3	4	2	2	4	2	1	4	3	4	6	6	5	2	5	0	1	3	0	0	5	0	3	6	5	5	1	0	0	0	0	1	0	0	0	0	5	0	2	16	1
997	2.20689	2.43061	0.484874	5.01287	5.3624e-07	1.60872e-06	4	1	1	5	4	4	3	5	0	4	7	6	7	2	9	2	2	1	0	0	0	0	6	0	2	11	0	2	0	0	0	1	0	3	1	0	1	0	6	0	1	20	1
998	4.37729	1.78368	0.601163	2.96704	0.00300681	0.00563776	0	1	2	1	3	0	3	4	3	2	3	3	8	10	5	1	7	0	2	1	0	0	3	1	1	3	7	9	1	0	1	3	0	2	0	0	0	5	5	0	9	18	0
999	4.01762	2.7962	0.52954	5.28044	1.28877e-07	3.96297e-07	6	1	3	1	4	1	3	4	2	9	1	5	7	6	4	2	5	0	0	0	1	0	4	1	2	5	1	3	0	0	0	0	1	1	0	0	0	1	6	0	5	15	1
1001	4.73449	2.57661	0.574695	4.48343	7.34523e-06	1.96833e-05	1	3	2	3	5	3	1	4	4	2	1	3	5	8	3	2	3	0	0	1	1	1	6	0	4	6	5	5	1	0	0	0	0	4	0	0	0	1	4	0	3	14	0
1002	2.7371	1.65025	0.522054	3.16106	0.00157195	0.00309359	6	1	5	4	4	1	1	4	1	1	2	2	7	7	14	4	4	0	0	0	0	1	1	1	1	6	3	5	0	0	0	1	1	2	0	0	1	9	5	0	1	10	0
1004	3.88041	2.27566	0.512498	4.44032	8.98264e-06	2.37096e-05	6	0	3	2	7	1	3	4	2	6	2	4	9	4	2	3	4	0	0	2	1	1	2	1	5	12	2	7	0	1	1	0	0	6	0	0	0	1	4	0	3	20	1
1005	2.79362	1.39887	0.514555	2.71861	0.00655575	0.011619	3	2	2	2	3	2	1	4	1	1	2	6	10	6	8	0	5	0	0	0	1	1	4	2	5	6	7	6	0	0	0	2	1	4	0	0	1	1	4	0	0	18	0
1006	3.4879	2.38292	0.484909	4.91417	8.91592e-07	2.62359e-06	3	2	1	3	9	3	1	8	1	6	3	4	6	4	3	5	2	0	0	2	3	0	7	0	3	7	3	9	0	0	0	2	0	2	0	1	0	3	11	0	3	14	2
1007	2.38308	1.67086	0.48567	3.44031	0.000581046	0.00122378	3	2	6	2	7	3	2	2	1	2	4	2	9	9	8	1	6	0	0	0	0	2	7	0	3	14	6	3	0	0	1	1	0	0	0	0	0	2	8	0	2	12	2
1008	4.8033	2.64026	0.545707	4.83824	1.30995e-06	3.80009e-06	6	2	3	1	1	3	2	4	3	6	3	7	9	9	7	3	2	0	0	1	0	0	4	2	2	2	4	6	0	0	1	0	1	1	0	0	0	1	11	0	1	16	0
1010	2.42213	1.9935	0.478881	4.16284	3.14317e-05	7.87393e-05	6	2	4	4	3	2	4	3	0	5	2	5	8	8	3	6	9	0	2	0	0	0	4	0	3	7	1	9	1	0	0	1	0	4	0	0	2	1	7	0	4	25	0
1011	4.12837	2.01202	0.574444	3.50255	0.000460829	0.000996167	5	2	0	2	7	0	4	1	3	2	3	2	9	8	6	1	5	1	0	2	0	1	7	0	3	5	5	6	0	0	0	0	0	4	0	0	0	3	4	1	1	14	1
1012	3.96154	1.93599	0.576555	3.35786	0.000785492	0.00163202	5	0	2	0	3	3	2	1	3	4	6	6	3	6	5	2	7	2	0	0	0	0	5	1	1	6	3	3	0	0	0	0	0	0	2	1	1	2	9	0	5	17	0
1013	3.55933	2.54958	0.541057	4.71221	2.45039e-06	6.94466e-06	4	2	0	2	3	3	7	3	2	3	1	3	7	6	7	1	7	0	1	0	1	3	9	2	3	5	5	3	0	0	0	0	0	1	0	0	1	3	2	0	0	12	0
1014	4.4439	2.3058	0.522892	4.40971	1.03508e-05	2.72623e-05	6	2	3	4	3	5	3	4	3	1	4	5	7	10	3	3	8	0	1	1	1	0	5	0	3	13	1	6	0	1	0	2	0	3	0	1	0	2	5	0	0	20	0
1015	2.43166	2.04089	0.50209	4.06479	4.80752e-05	0.000118029	4	1	2	2	3	3	2	1	1	6	2	8	5	11	4	3	8	0	0	0	0	0	3	0	2	10	1	6	0	0	0	1	0	3	2	0	1	4	1	0	2	15	0
1016	4.02618	1.90622	0.582742	3.27113	0.0010712	0.00217781	4	1	4	2	1	4	2	3	3	0	3	8	5	11	8	0	7	2	2	1	0	0	0	1	3	8	3	3	0	0	0	1	0	1	0	1	1	1	10	0	3	15	0
1017	4.08496	2.51273	0.546975	4.59386	4.35122e-06	1.19732e-05	1	0	2	8	3	3	3	1	3	4	3	4	5	6	3	1	6	0	0	0	1	0	8	0	1	6	7	6	0	0	0	1	0	4	0	2	1	0	3	0	1	14	2
1018	2.50545	1.45961	0.479715	3.04266	0.00234501	0.00450681	4	1	1	2	6	2	3	5	0	2	3	5	6	9	7	1	4	1	0	3	1	0	4	0	3	12	6	5	0	1	1	0	0	2	0	0	0	0	5	0	4	19	2
1019	5.74412	2.69613	0.591469	4.55836	5.15557e-06	1.39986e-05	4	0	2	2	1	2	3	4	5	2	1	4	8	3	7	2	8	1	0	0	0	0	5	1	0	9	2	10	0	1	0	1	0	1	0	0	0	1	4	0	1	8	1
1021	2.42501	1.17227	0.488617	2.39917	0.0164324	0.0276497	0	3	6	4	4	2	1	2	1	0	0	7	7	6	4	3	3	0	1	1	1	0	5	2	4	8	5	9	0	0	1	2	0	3	0	0	0	4	9	0	2	14	0
1022	2.4732	1.33087	0.527848	2.52132	0.0116915	0.0198901	2	1	1	2	2	1	2	4	1	1	5	2	5	3	3	1	5	1	0	1	1	2	5	0	4	8	6	3	0	0	0	1	0	4	0	0	1	2	5	0	3	20	1
1023	1.91059	1.0449	0.459087	2.27603	0.0228442	0.037615	4	1	0	2	2	1	1	5	0	2	2	5	7	8	7	3	7	1	0	0	2	1	7	0	2	8	4	6	0	0	0	1	0	5	1	1	0	3	2	0	2	10	2
1025	5.4713	3.08389	0.674809	4.57002	4.87685e-06	1.33301e-05	10	2	0	1	0	2	1	3	5	4	1	7	4	7	9	1	5	0	0	0	2	0	2	0	1	4	5	3	0	0	1	1	0	0	0	0	0	0	5	0	1	24	1
1026	3.43476	1.89434	0.515039	3.67805	0.000235023	0.000526553	4	3	5	0	3	1	1	4	2	1	9	5	6	6	4	5	6	0	0	0	0	0	6	0	2	2	1	4	1	2	0	0	0	3	1	1	1	0	4	0	1	12	1
1027	2.04241	1.48796	0.491069	3.03004	0.0024452	0.00467017	1	1	3	2	3	1	5	2	0	4	2	1	6	8	8	3	6	1	0	0	1	1	6	0	1	4	2	6	2	0	0	0	0	3	0	0	2	3	7	0	4	10	3
1028	4.88533	2.3491	0.538895	4.3591	1.30599e-05	3.38895e-05	4	1	1	0	8	4	2	4	4	2	5	8	7	3	7	5	11	1	0	0	1	1	8	0	4	5	3	6	0	0	0	0	0	2	0	1	0	3	5	0	2	9	3
1030	6.05275	2.86921	0.51848	5.53388	3.13225e-08	1.0033e-07	5	7	5	3	3	4	6	1	5	3	3	5	7	8	3	2	3	0	0	0	0	0	7	3	3	6	3	8	0	0	0	2	0	2	1	1	0	6	4	0	2	13	1
1031	4.47566	2.69556	0.658134	4.09576	4.2078e-05	0.000103719	8	0	0	2	3	2	0	4	4	3	1	5	10	10	7	3	7	0	0	2	0	0	8	0	2	3	4	8	0	0	0	0	0	3	0	0	0	0	3	0	1	20	1
1032	1.66768	1.38219	0.466341	2.96391	0.00303755	0.0056781	3	2	3	1	3	1	4	0	0	5	4	3	11	5	5	4	2	0	0	0	0	0	2	0	2	8	5	9	0	0	0	0	0	5	0	0	0	4	4	0	3	16	1
1033	3.64625	2.23203	0.540087	4.13272	3.58489e-05	8.90791e-05	5	3	5	2	0	2	4	5	2	1	1	3	5	4	2	4	6	3	0	0	0	0	6	0	4	6	3	10	0	0	1	1	0	1	1	0	0	2	7	0	1	15	1
1034	4.43049	2.44827	0.555602	4.40651	1.05048e-05	2.76087e-05	4	1	3	3	2	2	2	3	3	3	4	7	11	5	4	6	7	1	0	1	0	0	9	1	3	4	1	12	0	0	0	0	0	3	0	0	0	2	4	2	3	14	0
1035	3.92792	1.72194	0.549451	3.13393	0.00172481	0.00337822	6	3	2	5	5	2	1	2	3	0	2	2	6	7	5	5	6	0	2	0	2	0	7	0	1	8	4	10	0	0	1	0	0	3	0	1	0	1	9	0	2	25	0
1037	2.43866	1.58913	0.537742	2.95518	0.00312483	0.00581473	2	0	2	1	1	2	2	5	1	0	5	6	6	6	3	2	5	1	0	1	1	0	6	2	3	5	1	10	0	1	0	0	0	1	1	1	0	2	3	0	2	11	0
1041	2.09124	1.58575	0.466442	3.39968	0.00067465	0.00140647	6	1	4	0	2	1	3	4	0	4	5	5	6	9	4	3	4	1	0	0	1	0	2	1	2	7	5	5	0	0	1	1	0	4	0	0	1	5	5	0	1	21	1
1042	2.58824	1.88336	0.484852	3.88441	0.000102579	0.000241248	4	1	2	2	4	2	2	4	1	2	7	5	4	3	5	4	4	1	0	0	0	1	5	0	6	3	3	3	0	0	1	0	0	3	0	0	0	1	6	0	3	14	0
1044	4.35706	2.22098	0.539877	4.11387	3.89081e-05	9.60982e-05	4	2	1	0	4	3	2	4	3	4	3	7	11	10	9	2	6	1	0	1	0	0	5	0	1	9	3	8	0	0	0	2	0	3	1	0	2	0	6	0	3	17	0
1046	2.18097	2.06249	0.461388	4.4702	7.81472e-06	2.07982e-05	3	2	1	2	2	6	4	3	0	5	5	6	10	10	6	3	6	0	1	0	1	1	6	0	3	15	2	5	0	0	1	1	0	4	0	1	0	1	5	0	0	15	1
1047	3.82257	2.68552	0.505295	5.31475	1.06804e-07	3.30903e-07	4	3	3	8	3	2	2	4	2	5	2	4	8	5	6	1	4	0	0	0	1	1	5	1	1	9	4	6	0	1	0	0	0	3	0	1	0	0	3	0	1	17	2
1048	3.09372	1.61874	0.53507	3.02528	0.002484	0.00472228	4	1	3	3	2	3	2	3	2	0	3	2	4	8	6	4	9	0	1	2	0	1	5	0	7	5	2	3	0	0	0	0	0	7	0	0	0	3	2	0	3	9	1
1049	2.67646	1.68323	0.504257	3.33803	0.000843745	0.00173256	3	0	3	3	3	3	3	2	1	3	6	3	5	0	3	4	9	1	3	0	0	1	7	0	2	9	2	7	0	0	0	1	0	5	0	0	2	2	7	0	2	14	0
1050	1.24668	0.914805	0.454122	2.01445	0.0439626	0.0685349	2	1	1	1	2	2	2	2	0	0	4	9	5	7	6	1	7	0	1	0	1	0	4	1	3	8	3	9	0	0	0	0	0	1	0	0	0	1	8	0	1	12	1
1051	4.0313	2.23363	0.582505	3.83452	0.000125808	0.000291419	1	1	2	1	1	1	1	3	3	6	1	2	7	10	5	4	6	0	0	1	2	1	4	0	5	4	2	3	0	0	0	0	0	5	1	0	1	4	3	0	1	11	1
1052	2.12509	1.13165	0.49737	2.27527	0.0228895	0.0376391	1	2	2	3	1	1	4	3	0	2	1	1	11	7	10	3	5	1	2	1	1	0	4	1	1	8	3	4	0	0	0	2	0	3	0	0	0	1	4	0	4	19	3
1053	3.35008	1.5959	0.524224	3.04431	0.00233218	0.00448917	7	1	4	1	5	3	1	3	2	3	1	2	6	14	6	4	6	1	1	1	0	0	6	1	4	8	1	4	0	0	1	0	0	5	0	2	0	5	4	0	1	18	1
1054	1.70226	1.61289	0.504452	3.19732	0.00138713	0.00274746	0	1	5	0	4	4	1	5	0	2	6	4	6	3	5	2	1	0	1	0	1	1	1	0	4	6	4	2	0	0	0	2	0	10	0	0	0	2	3	0	3	11	0
1056	4.13753	2.17984	0.565285	3.85618	0.00011517	0.000268295	2	2	1	0	4	1	4	5	3	0	7	3	8	6	8	1	4	0	0	0	0	1	3	1	2	7	4	5	0	0	0	1	0	6	1	0	0	2	10	0	2	13	1
1058	1.67668	0.997047	0.467537	2.13255	0.0329613	0.0526524	3	0	5	2	5	1	1	3	0	2	2	3	8	4	5	5	12	0	1	1	1	1	6	0	2	11	1	2	0	0	0	0	0	3	0	1	0	3	5	0	1	13	0
1060	4.64588	2.29412	0.587758	3.90317	9.49391e-05	0.000225	0	4	3	2	4	0	2	2	4	2	2	4	9	4	3	2	1	0	1	1	1	0	7	0	3	5	1	5	0	0	0	2	0	4	0	0	1	1	7	0	1	9	0
1061	2.84704	1.42109	0.55686	2.55196	0.0107118	0.0184532	1	1	1	0	5	3	1	1	2	2	6	5	7	7	7	1	3	0	0	1	1	1	4	0	2	4	1	6	0	0	1	0	0	0	0	0	0	2	5	0	1	16	0
1062	3.27554	1.91131	0.479391	3.98695	6.69271e-05	0.000161412	4	0	3	3	8	3	2	6	1	2	6	5	2	7	4	3	6	0	0	0	0	0	3	0	6	11	4	6	0	0	1	0	1	5	0	0	1	2	5	0	3	24	1
1063	3.08886	1.5831	0.472639	3.34948	0.00080962	0.00167086	2	1	5	2	4	1	3	3	1	3	7	4	11	5	7	1	4	0	1	2	0	0	7	1	2	7	1	7	0	0	0	0	0	6	1	1	0	3	6	1	1	13	2
1064	3.60429	1.58047	0.549545	2.87596	0.00402806	0.00734002	3	0	0	0	1	5	1	4	2	3	2	6	12	10	6	5	7	0	0	1	0	1	3	1	2	12	2	11	0	0	0	0	0	2	0	1	0	3	6	1	2	9	1
1066	3.18398	2.05217	0.53684	3.82268	0.000132011	0.000304641	4	2	4	0	3	3	3	1	2	5	2	2	7	5	4	2	8	0	0	0	0	1	11	0	1	9	3	1	0	0	0	0	0	4	0	0	0	2	4	0	1	19	1
1067	2.10718	2.09138	0.537659	3.88979	0.000100331	0.000236866	3	1	5	1	2	1	2	8	0	2	3	6	6	12	5	2	6	1	0	2	0	1	2	0	3	4	4	4	0	0	0	2	0	5	0	0	0	0	12	0	0	24	0
1068	1.82003	1.10475	0.464458	2.37859	0.017379	0.0290044	4	0	4	3	4	1	0	3	0	2	5	4	3	3	9	3	5	0	0	1	1	2	8	1	6	7	1	4	0	0	0	0	1	4	0	0	0	3	4	0	2	15	0
1069	2.1391	1.51692	0.455378	3.33112	0.000864985	0.00177063	3	0	2	2	3	4	3	4	0	3	7	3	9	4	7	8	6	0	1	2	0	0	5	0	1	9	4	3	1	0	0	0	0	3	1	0	2	0	4	0	3	18	0
1070	1.83029	1.80173	0.471444	3.82174	0.000132515	0.000305232	5	2	2	1	5	1	2	4	0	4	4	3	5	2	3	2	2	0	0	2	0	0	8	0	3	10	2	2	0	0	0	1	0	4	0	0	0	0	6	0	2	12	3
1073	2.69883	1.65237	0.516117	3.20153	0.00136699	0.00271194	5	2	4	1	2	1	3	2	1	4	7	1	5	11	10	9	6	0	0	0	0	0	2	0	3	11	6	10	1	0	1	0	0	10	0	0	0	1	10	0	1	17	0
1074	2.50869	1.40453	0.534661	2.62695	0.00861547	0.0150313	2	0	2	3	7	1	3	2	1	1	1	5	9	5	6	2	4	0	2	2	0	0	7	0	2	6	2	4	0	0	1	0	0	6	1	0	0	0	1	0	1	14	1
1076	3.31188	2.51212	0.557209	4.5084	6.53171e-06	1.75799e-05	2	0	2	0	4	4	5	5	1	6	0	5	4	8	8	4	6	0	1	1	0	1	4	0	1	2	3	5	0	0	0	0	0	2	0	1	0	5	8	1	1	19	0
1078	1.97228	1.71167	0.489582	3.49618	0.000471972	0.0010149	4	1	1	0	1	2	5	3	0	4	2	4	6	5	2	5	6	0	0	2	3	0	11	0	4	6	2	6	0	0	1	1	0	3	0	0	0	1	4	0	2	11	1
1079	2.5266	1.31744	0.510564	2.58035	0.00986995	0.0170986	1	2	4	2	1	2	0	4	1	2	4	5	6	5	6	1	7	1	0	0	2	2	4	1	4	7	6	4	0	0	0	0	0	3	0	0	1	5	4	0	4	18	2
1080	2.51246	2.29786	0.512687	4.48199	7.39509e-06	1.97738e-05	7	1	2	2	1	1	2	3	1	6	7	3	5	6	4	5	6	0	0	0	1	0	4	1	3	3	1	3	0	0	0	0	0	4	0	0	0	2	3	0	0	15	0
1081	3.75293	1.18244	0.581572	2.03318	0.0420347	0.0657795	3	0	1	1	3	4	0	3	2	2	2	4	5	1	7	3	5	1	2	1	0	0	9	1	7	7	4	3	1	0	1	1	1	4	1	0	2	1	5	0	1	14	0
1084	2.56713	1.51574	0.475991	3.1844	0.00145055	0.00286846	4	3	2	1	5	2	1	3	1	3	4	4	7	6	7	2	6	0	0	1	3	1	4	0	5	6	1	7	0	0	0	1	0	3	0	1	0	2	4	0	1	17	1
1086	3.21406	1.93747	0.486367	3.98355	6.7893e-05	0.000163421	3	5	1	3	3	2	2	2	2	2	4	7	8	5	7	5	4	0	1	1	2	0	8	0	3	8	1	5	0	0	0	0	0	2	0	0	1	4	4	0	1	11	1
1087	2.18466	1.16866	0.493778	2.36678	0.0179435	0.0299059	2	1	3	2	8	1	2	1	1	1	2	6	5	7	1	2	2	1	2	1	0	0	5	2	1	6	3	6	0	0	0	0	0	4	0	0	0	3	3	0	1	18	2
1088	2.26009	1.08789	0.539756	2.01552	0.0438505	0.0684468	6	1	2	0	2	0	1	0	1	5	4	3	8	0	4	2	7	0	1	0	0	0	2	3	1	12	4	7	0	0	0	2	0	5	1	0	1	3	5	0	2	13	1
1092	1.74394	1.00019	0.468338	2.13561	0.0327108	0.0523203	2	1	1	1	8	1	3	1	0	2	2	6	6	5	8	8	8	0	1	0	2	0	4	2	1	7	0	4	1	0	0	2	0	3	0	1	0	1	3	0	2	9	1
1094	1.61769	1.25906	0.437529	2.87767	0.00400622	0.00731106	4	2	2	1	4	3	3	0	0	4	3	3	5	9	10	3	2	1	2	1	1	1	6	0	1	9	3	4	0	0	0	0	0	4	0	1	0	2	6	0	2	9	2
1095	3.77505	1.90393	0.526937	3.6132	0.000302445	0.000667876	4	0	1	3	3	3	3	0	3	3	2	10	9	5	7	2	7	0	1	0	2	1	7	0	2	5	3	4	0	0	1	0	0	4	0	0	0	2	3	0	2	10	0
1096	2.13151	1.32831	0.543589	2.4436	0.0145416	0.0245689	7	1	0	2	0	1	1	2	1	1	3	8	8	6	4	2	10	0	0	0	0	2	1	1	1	10	2	3	2	0	0	0	0	1	0	0	0	1	6	0	0	7	0
1099	1.81292	1.7229	0.502797	3.42663	0.000611121	0.00128492	4	1	0	2	4	1	1	1	0	8	4	4	6	2	6	4	4	1	1	0	2	0	11	0	1	4	3	7	0	0	0	0	0	1	0	2	0	1	5	0	0	7	1
1100	2.59005	1.64071	0.486631	3.37158	0.000747391	0.00155548	2	2	2	3	8	0	5	1	1	2	6	4	4	4	6	4	8	0	1	0	0	1	10	2	1	10	4	6	0	0	0	0	0	3	0	1	0	2	6	0	3	18	0
1102	1.58339	1.26074	0.512695	2.45904	0.0139309	0.0236043	5	1	3	2	0	1	2	1	0	4	1	2	6	3	3	3	5	1	0	2	1	0	4	0	6	6	3	5	1	0	0	2	0	3	0	0	0	1	3	0	1	17	2
1103	2.61604	1.4023	0.546085	2.56792	0.0102312	0.0176996	5	1	1	0	2	1	4	3	1	0	2	7	5	7	8	3	10	0	0	0	1	0	6	0	1	4	4	8	0	0	0	0	0	3	1	0	1	3	7	1	1	13	0
1104	1.12326	1.0084	0.469761	2.14663	0.0318225	0.0509656	4	0	4	2	3	2	2	2	0	0	2	2	5	5	3	6	4	1	1	0	0	0	2	1	4	6	1	3	0	0	0	0	0	5	0	0	0	1	2	0	2	14	0
1106	3.19986	2.0477	0.569072	3.59831	0.00032029	0.000706016	4	1	3	0	2	0	2	6	2	1	3	2	5	6	4	4	3	0	0	1	0	0	3	0	3	6	2	5	0	0	1	1	0	2	0	0	0	1	5	0	3	10	2
1107	1.77764	0.9965	0.452672	2.20137	0.0277096	0.0449048	3	1	5	1	5	2	2	1	0	3	4	2	6	4	4	5	5	0	0	1	0	1	8	2	6	6	2	4	1	1	0	0	0	4	0	1	1	4	8	0	6	12	0
1108	1.58318	1.05795	0.507126	2.08616	0.036964	0.0585898	3	0	0	2	4	0	1	5	0	1	6	1	8	6	3	1	7	1	1	1	1	0	5	0	1	5	5	4	0	0	0	0	0	2	0	0	0	2	7	0	1	19	2
1109	1.59235	1.19299	0.512513	2.32772	0.0199271	0.0330773	3	0	3	0	4	2	1	3	0	3	1	4	7	7	2	1	1	0	0	0	1	1	1	1	1	9	3	10	0	0	1	1	0	5	0	0	0	2	4	0	1	14	1
1110	2.41891	1.74188	0.520251	3.34815	0.000813543	0.00167614	4	1	1	3	6	5	0	3	1	1	4	3	7	5	4	2	5	0	0	0	1	0	5	0	4	10	2	5	0	0	0	1	1	0	0	1	0	2	0	0	2	13	2
1113	2.64346	1.08985	0.516329	2.11077	0.0347923	0.0552901	4	0	3	0	3	4	1	4	1	1	1	4	10	3	4	6	8	0	0	0	1	0	6	1	4	10	3	6	0	0	0	0	1	3	0	0	1	1	3	0	1	14	1
1237	1.77108	1.11164	0.515236	2.15755	0.0309632	0.0497839	2	2	0	0	4	1	1	3	0	3	4	5	8	11	4	5	2	2	0	0	0	1	2	2	2	4	6	2	1	0	1	2	0	3	0	0	0	5	4	0	4	10	0
1254	1.84536	1.13112	0.511431	2.21168	0.0269889	0.0438525	1	2	3	1	3	0	0	3	0	3	3	6	2	7	5	4	4	0	0	0	1	1	4	0	3	9	0	7	0	0	0	1	1	1	0	0	1	4	5	0	2	20	1
1255	2.32813	1.75033	0.542117	3.22869	0.0012436	0.00249531	4	1	2	0	4	1	0	3	1	4	4	6	3	5	1	1	4	1	2	0	0	1	3	0	1	5	2	3	0	0	1	2	0	1	0	0	0	2	3	0	4	19	1
1306	2.80291	1.48633	0.492557	3.01758	0.00254803	0.00481425	2	2	2	2	4	2	2	6	1	0	6	3	11	7	7	4	4	1	0	2	2	2	5	2	4	5	2	4	0	0	0	1	0	1	0	0	0	1	9	0	4	20	0
1542	2.99072	1.18349	0.540154	2.19103	0.0284493	0.046043	5	4	5	1	3	1	1	0	2	0	0	9	7	10	4	3	9	0	0	1	2	0	5	1	6	6	2	5	1	0	0	0	1	1	0	0	0	1	6	0	0	17	0
1550	1.78792	1.06998	0.435126	2.45901	0.0139323	0.0236043	5	0	6	1	6	3	0	0	0	4	9	4	6	10	8	4	5	1	1	2	1	0	3	0	1	10	2	6	0	0	1	2	0	2	0	0	1	2	1	0	2	14	2
1559	1.79554	0.887494	0.437907	2.02667	0.042696	0.0667295	8	7	5	1	3	0	2	0	0	0	8	0	11	10	5	3	2	0	2	1	0	0	13	0	3	10	4	13	1	0	0	0	0	4	0	0	2	3	7	0	3	19	1
1564	1.55131	1.10179	0.392881	2.80438	0.00504139	0.00902607	3	3	10	5	5	0	1	0	0	1	8	3	5	9	6	2	12	0	1	1	2	1	10	1	2	7	4	6	0	0	0	0	0	3	0	0	1	2	3	0	3	17	2
1573	2.69943	1.05286	0.393847	2.67327	0.00751158	0.0131613	4	6	3	4	3	3	2	2	0	1	3	14	19	7	6	10	6	0	0	0	0	0	8	2	6	8	3	10	1	0	0	3	0	7	0	1	0	4	5	1	7	24	1
1575	2.27666	0.838219	0.383247	2.18715	0.0287315	0.0464386	5	2	5	4	3	8	1	1	0	2	7	3	14	9	7	9	3	1	1	0	3	1	11	1	1	9	5	10	0	0	0	1	0	2	0	1	0	7	11	0	1	21	1
1585	2.28015	0.798579	0.3886	2.05502	0.0398775	0.0626428	6	3	6	2	4	2	4	0	0	0	9	9	10	12	6	3	12	0	2	4	0	0	6	1	3	12	4	7	1	0	1	1	0	6	2	1	0	2	10	0	2	24	0
1587	2.37691	0.689309	0.348168	1.97982	0.0477239	0.07393	7	4	12	1	5	2	0	1	0	2	10	5	10	20	9	2	13	0	2	0	0	2	10	3	6	8	5	9	1	0	1	0	0	7	1	0	1	5	9	0	4	26	2
1588	1.74168	1.06607	0.368048	2.89654	0.003773	0.00695771	12	5	6	2	6	3	0	1	0	0	10	6	22	12	7	7	10	1	0	1	1	1	12	0	5	9	8	6	0	0	0	1	0	4	0	0	1	4	6	0	0	25	3
1589	2.78544	0.851474	0.377919	2.25306	0.0242551	0.0397784	10	3	6	0	5	4	3	2	0	1	11	4	8	12	5	5	9	1	3	0	2	1	12	2	9	10	6	13	0	1	0	0	0	3	0	2	0	1	7	1	5	16	1
1590	2.53554	0.742772	0.358139	2.07398	0.0380815	0.0600517	8	4	8	1	5	6	1	1	0	1	5	8	12	10	5	4	9	0	3	0	0	6	10	2	5	14	7	11	0	0	1	1	0	5	0	2	3	3	11	0	5	21	3
1593	2.37527	1.08928	0.382384	2.84864	0.00439062	0.0079302	11	5	6	3	4	1	0	3	0	1	9	7	11	8	5	5	9	2	0	0	1	2	7	3	7	6	8	10	1	0	0	0	0	8	1	1	2	3	11	0	3	24	1
1596	2.25606	0.713073	0.341499	2.08807	0.0367919	0.0583923	3	4	14	4	4	2	1	1	0	1	6	8	13	13	4	9	10	2	1	2	1	1	9	1	10	10	5	8	0	0	1	0	0	10	0	0	0	2	13	0	4	21	2
1597	2.6414	0.762676	0.336514	2.2664	0.0234268	0.0384713	6	3	6	2	12	5	0	0	0	2	8	13	21	9	2	6	15	1	2	1	2	0	13	0	3	11	7	10	2	0	2	1	0	9	2	0	0	4	6	0	5	23	1
1598	3.1453	0.904601	0.353518	2.55885	0.0105018	0.0181422	10	5	10	1	7	6	1	1	0	3	8	7	9	8	10	7	9	2	3	1	4	0	8	2	8	13	12	9	0	0	1	3	0	6	0	1	0	2	7	1	2	31	2
1599	2.7998	1.01541	0.342967	2.96066	0.00306981	0.00572409	11	2	6	1	5	7	4	2	0	1	17	8	14	5	1	7	11	1	1	1	2	0	13	1	10	10	7	5	0	0	0	2	0	6	1	2	1	3	10	0	6	23	5
1600	4.28052	0.900882	0.378308	2.38135	0.0172494	0.0288271	9	8	8	2	5	4	2	2	1	1	6	13	7	3	8	7	12	1	1	5	2	2	15	2	12	9	6	13	0	0	0	4	0	8	3	1	1	8	10	0	3	18	3
1601	3.96151	1.12515	0.371768	3.02647	0.00247429	0.00471202	11	11	5	4	2	4	1	4	0	1	15	14	13	6	11	10	9	1	0	4	3	1	15	0	1	15	3	8	1	1	1	0	0	17	2	1	1	5	15	0	2	29	4
1602	3.5902	0.759957	0.340533	2.23167	0.0256369	0.0418214	13	6	7	3	8	5	1	0	0	1	11	10	18	11	8	15	10	0	1	3	3	2	8	3	4	14	7	11	0	0	1	2	1	9	2	3	2	2	10	1	1	22	5
1603	2.70071	1.01947	0.359247	2.8378	0.00454261	0.00819269	9	7	8	2	0	3	1	3	0	2	12	7	18	10	9	7	17	0	1	1	0	2	14	0	4	19	7	7	2	0	0	1	0	8	0	1	0	5	4	0	5	24	0
1604	3.36726	0.848703	0.335462	2.52996	0.0114077	0.0194747	5	7	10	2	12	4	2	2	0	1	8	9	12	13	9	5	13	1	2	3	1	3	10	4	8	16	15	12	0	0	0	1	0	8	0	1	2	2	10	1	6	20	2
1605	3.35578	0.761997	0.357832	2.12948	0.0332143	0.0529878	7	4	12	1	8	6	1	0	0	0	16	17	23	15	8	7	11	1	3	2	3	2	12	1	9	11	1	12	0	3	3	4	0	10	0	0	1	4	11	0	6	17	3
1606	2.67657	1.06081	0.337589	3.1423	0.00167625	0.00328833	9	7	15	1	7	4	0	1	0	1	14	17	18	18	7	6	11	0	2	2	0	1	7	0	8	7	9	11	0	2	0	0	0	9	1	0	0	8	6	0	5	25	1
1612	3.48523	1.09145	0.308201	3.54135	0.000398087	0.000866632	15	10	12	1	10	4	0	1	0	3	11	10	16	12	6	9	15	1	0	2	2	0	13	2	6	11	6	15	0	1	1	2	0	10	0	2	2	2	6	0	5	23	2
1613	3.28062	1.03338	0.297752	3.47059	0.00051931	0.00110702	13	11	10	4	9	6	2	0	0	1	17	5	22	13	16	8	12	1	2	1	1	1	13	4	4	8	7	14	0	0	0	1	0	13	1	1	2	5	13	0	4	28	4
1614	3.59815	0.695056	0.312308	2.22555	0.0260446	0.0424303	12	7	14	2	5	7	1	0	0	1	15	6	27	15	16	9	18	0	1	1	8	1	9	3	5	17	5	17	1	0	0	4	0	9	2	1	0	5	14	2	7	27	1
1615	4.59546	0.774487	0.334566	2.3149	0.0206183	0.0341321	9	6	14	2	11	5	2	1	1	1	15	8	26	14	8	8	20	1	2	1	5	0	10	5	4	17	12	12	3	2	0	2	0	9	0	2	1	7	12	0	8	27	2
1618	4.08039	0.866649	0.28667	3.02316	0.0025015	0.00474091	11	7	15	4	8	4	2	0	0	2	19	21	17	17	12	10	14	1	2	1	4	3	11	1	7	22	12	23	0	0	0	1	0	18	3	3	2	10	10	1	3	25	2
1620	3.58962	0.899898	0.290216	3.10079	0.00193005	0.00374441	9	8	18	3	11	2	0	1	0	2	23	19	27	14	10	11	14	1	1	2	4	5	11	4	10	17	6	21	0	0	0	2	0	18	0	2	1	4	13	0	6	19	1
1622	3.97167	1.04006	0.295508	3.51955	0.000432273	0.000937734	12	13	15	1	11	6	0	0	0	5	20	15	36	16	12	10	22	1	2	3	4	2	16	0	7	15	10	19	0	1	1	2	0	11	1	2	1	6	14	0	4	33	6
1623	5.10449	0.918688	0.303557	3.02641	0.00247477	0.00471202	16	15	17	6	6	7	0	1	0	0	18	24	25	16	14	21	14	2	2	3	6	3	12	3	12	17	14	12	0	1	1	2	0	16	1	1	2	8	11	1	5	31	2
1624	5.59731	0.876042	0.317256	2.76131	0.00575698	0.0102476	15	9	18	2	8	11	0	3	1	2	11	20	31	14	14	18	15	0	0	2	1	5	11	4	10	22	14	14	3	0	1	3	0	12	3	0	0	3	11	1	8	29	6
1625	4.62187	0.668682	0.280585	2.38318	0.017164	0.0287234	18	7	14	5	5	6	2	1	0	1	21	13	33	13	14	15	13	0	4	2	4	3	16	4	5	24	10	16	0	0	0	3	0	16	4	4	1	13	19	0	4	27	4
1626	5.60656	0.582254	0.280896	2.07284	0.0381867	0.0601404	15	6	16	4	17	8	1	1	0	1	26	17	34	14	19	14	26	1	3	1	4	4	13	4	11	27	9	13	0	1	5	2	0	19	2	1	1	11	19	1	5	42	4
1628	5.61907	1.20555	0.290048	4.1564	3.23305e-05	8.08262e-05	14	21	21	2	12	9	0	1	0	4	27	25	30	19	19	15	18	0	3	1	6	2	14	2	5	20	9	21	1	1	2	7	0	23	2	1	0	9	18	1	3	29	5
1629	5.90459	0.853716	0.28837	2.96049	0.00307146	0.00572409	21	10	16	3	14	7	4	1	0	2	22	19	36	16	14	12	26	3	2	2	8	2	15	1	8	19	11	17	0	1	4	1	0	25	2	2	1	11	20	2	9	42	6
1630	7.02219	0.773799	0.329258	2.35013	0.0187668	0.0312357	14	16	25	8	13	10	1	1	0	2	19	13	42	22	26	13	20	3	4	6	8	4	18	10	6	13	11	16	0	0	5	3	0	30	1	4	0	7	22	2	5	25	9
1631	5.80348	0.819206	0.270226	3.03156	0.00243295	0.00465715	10	17	16	2	15	7	2	2	0	1	28	20	48	26	18	15	29	1	1	3	4	1	26	4	7	26	8	16	1	0	0	3	0	30	1	1	2	6	26	2	8	43	3
1632	6.1544	0.643716	0.267044	2.41052	0.0159296	0.0268403	22	9	19	3	12	5	2	1	0	4	22	15	40	19	25	18	30	2	1	5	6	4	24	8	11	23	11	12	0	2	2	4	1	13	3	3	4	7	19	0	7	35	4
1633	5.85301	1.03995	0.280912	3.70205	0.000213867	0.000481788	17	16	29	1	10	7	4	2	0	1	23	22	37	20	24	14	25	2	5	2	5	5	24	1	7	19	11	22	0	0	4	3	0	24	3	3	2	4	21	0	6	27	7
1634	6.14497	0.720927	0.274674	2.62467	0.00867335	0.0151108	20	19	22	3	15	9	0	1	0	1	16	17	52	19	20	15	29	1	2	2	4	5	21	3	8	25	18	17	2	0	4	3	0	25	2	1	6	7	24	0	7	39	6
1637	6.90366	0.716862	0.244712	2.92941	0.00339606	0.00630039	24	13	15	6	12	8	1	3	0	3	30	25	61	19	18	20	31	4	2	1	2	2	23	7	8	26	14	31	1	0	3	2	0	29	3	6	1	10	27	0	6	40	5
1638	7.29806	1.00179	0.256584	3.90433	9.44859e-05	0.000224358	23	18	26	3	22	9	3	2	0	4	27	21	33	18	15	19	33	0	3	2	4	3	22	3	9	35	19	20	0	0	3	4	0	34	3	3	5	12	25	1	11	33	10
1639	8.8363	1.27307	0.308399	4.12801	3.65923e-05	9.05605e-05	33	21	28	2	20	4	3	3	1	6	21	34	45	22	16	14	25	1	2	2	8	2	25	10	11	24	11	22	0	1	2	3	0	34	6	1	1	12	18	3	7	29	3
1640	8.33073	0.934596	0.280609	3.3306	0.0008666	0.00177063	20	21	30	4	21	9	1	1	1	3	41	23	44	31	22	23	26	2	1	8	8	0	27	5	13	31	14	22	2	1	0	5	0	49	1	5	2	10	29	1	8	39	10
1641	7.96658	0.921993	0.265953	3.46675	0.000526789	0.00111982	22	22	33	5	21	11	0	1	0	3	41	20	44	29	22	19	25	3	4	5	10	2	27	3	12	26	14	27	1	2	0	5	1	28	2	1	3	16	20	0	10	35	6
1642	8.14409	1.00577	0.276107	3.64267	0.00026982	0.000599058	21	25	32	6	23	8	2	1	1	1	24	28	55	27	24	31	28	3	3	4	4	4	41	7	12	34	18	31	3	2	0	2	0	37	1	1	1	9	14	1	5	41	7
1643	8.43551	0.585526	0.281735	2.07828	0.0376833	0.0595764	29	17	27	1	22	12	1	1	0	2	24	26	36	30	17	33	43	3	4	4	8	7	22	5	10	27	15	33	0	0	2	4	0	44	4	1	1	7	22	3	9	46	7
1645	9.52312	1.00502	0.248819	4.03917	5.36415e-05	0.000130911	35	25	37	3	25	9	3	3	0	3	45	28	62	32	28	30	30	2	3	6	9	3	36	6	14	33	15	34	1	1	4	4	1	40	2	6	0	11	29	2	9	45	4
1646	9.28019	0.866868	0.24194	3.58299	0.000339684	0.000746092	33	23	34	8	22	10	0	1	0	5	33	35	52	36	33	25	45	1	4	3	5	3	35	4	12	39	23	30	2	2	4	5	0	48	6	6	4	14	29	0	14	60	4
1647	11.0648	1.00917	0.261315	3.86189	0.000112511	0.000262598	35	25	40	3	26	8	3	4	1	5	41	36	69	49	30	34	43	3	6	1	10	7	28	3	17	40	15	31	1	0	6	3	0	30	4	4	5	11	33	1	16	51	6
1648	10.465	0.912576	0.272436	3.34969	0.000809016	0.00167086	31	29	34	6	28	10	2	3	0	2	39	34	58	33	25	21	47	1	5	2	5	6	20	7	14	33	18	36	0	2	7	9	1	51	3	7	4	14	36	1	8	47	5
1649	10.1043	0.7559	0.23515	3.21454	0.00130655	0.00260462	33	21	41	5	30	15	1	1	0	1	42	33	62	31	30	33	50	3	1	8	8	3	33	8	16	44	29	28	2	2	3	6	0	45	3	2	4	15	31	3	18	46	6
1650	10.4045	0.912055	0.260853	3.49643	0.000471529	0.0010149	30	32	37	6	19	10	2	5	0	2	48	29	61	31	24	28	37	2	6	12	7	5	40	11	18	54	19	29	3	2	3	3	0	51	4	6	1	15	34	0	11	60	6
1651	13.0905	1.138	0.267352	4.25656	2.07597e-05	5.26482e-05	40	32	36	7	29	13	5	5	2	2	39	51	71	31	41	25	46	4	2	0	13	5	40	7	31	40	22	36	1	1	1	9	0	42	6	6	2	12	32	2	16	51	7
1652	10.9736	0.841393	0.251	3.35216	0.000801834	0.00166036	35	26	52	5	27	15	5	1	0	5	41	30	64	36	38	33	56	1	4	8	15	4	38	10	21	40	26	38	0	1	4	8	1	67	3	2	3	14	45	0	12	63	11
1653	11.2145	0.97609	0.244804	3.98723	6.6849e-05	0.000161412	36	36	53	4	31	14	3	2	0	4	40	34	68	34	37	38	52	1	3	3	12	6	37	4	17	36	23	40	2	0	3	7	1	53	5	6	3	10	54	0	22	52	10
1654	12.452	1.08927	0.283717	3.83928	0.000123397	0.000286374	39	35	45	6	28	12	7	1	1	4	43	53	87	45	34	39	56	3	1	3	12	4	43	11	17	45	15	42	0	7	3	8	0	67	1	0	1	21	36	1	8	63	14
1655	12.9973	0.794182	0.228125	3.48134	0.000498915	0.00106724	45	24	43	4	38	16	6	5	0	2	42	46	83	41	43	48	71	1	5	7	8	6	46	10	15	53	44	40	1	4	2	8	2	57	4	5	2	13	34	1	23	65	7
1656	14.5869	1.24063	0.277557	4.46981	7.8289e-06	2.07982e-05	46	51	51	5	35	14	11	1	0	8	61	44	77	39	37	44	59	2	8	9	4	6	36	12	18	52	25	44	4	3	7	7	0	72	8	7	2	10	47	1	17	56	10
1657	13.9604	1.05967	0.253236	4.18453	2.8576e-05	7.18782e-05	43	33	42	6	22	19	2	4	2	8	55	49	94	32	37	26	66	4	1	10	13	1	59	13	15	42	34	46	1	1	5	5	1	72	2	7	3	21	51	0	17	61	9
1658	14.2391	0.869712	0.241853	3.59604	0.000323103	0.000710943	40	34	57	8	28	12	5	1	1	4	54	46	87	45	66	27	67	1	4	5	14	7	41	11	15	54	29	43	2	0	3	4	0	84	8	4	2	18	63	4	17	59	8
1659	14.3329	0.772693	0.249142	3.10141	0.001926	0.00374247	38	35	53	3	31	13	4	4	0	6	68	39	74	52	50	34	69	5	3	7	19	5	63	12	17	59	35	53	4	4	5	3	1	100	4	7	4	25	65	0	23	51	7
1660	15.5208	0.906061	0.257794	3.51467	0.000440293	0.000953451	55	37	50	9	33	21	0	4	2	1	64	54	103	54	60	42	64	6	1	12	16	5	45	11	18	54	31	50	1	5	6	13	0	87	1	6	3	17	46	1	15	73	4
1661	15.5608	1.05234	0.246583	4.2677	1.97502e-05	5.05047e-05	51	48	61	8	36	14	5	2	1	8	57	53	95	47	50	54	59	3	6	7	11	4	56	8	26	69	39	54	3	0	3	7	0	87	8	3	1	23	57	1	21	79	23
1663	17.0735	0.891652	0.235515	3.78596	0.000153116	0.000351368	56	40	78	9	40	19	6	0	1	3	78	62	120	60	58	46	60	1	4	8	10	6	56	13	20	78	37	69	5	2	8	11	0	102	8	12	5	23	57	2	16	67	11
1664	18.1889	1.04926	0.231508	4.53229	5.83487e-06	1.57388e-05	70	29	74	11	48	13	2	4	4	7	73	70	106	61	61	45	74	2	2	6	17	5	59	9	29	62	48	71	7	2	5	3	0	92	6	7	6	21	48	0	21	72	15
1665	18.0131	1.01418	0.225763	4.49223	7.04806e-06	1.89282e-05	69	46	65	12	52	16	5	3	1	6	82	56	93	60	61	47	73	4	8	8	21	5	63	17	32	81	41	65	1	5	6	7	1	101	3	10	2	21	45	1	27	85	9
1667	20.1603	0.77048	0.239972	3.21071	0.00132407	0.00263102	61	38	66	6	50	21	3	8	1	5	90	77	124	76	61	70	86	6	7	11	22	12	83	16	20	78	47	69	2	9	10	7	0	111	8	12	6	31	64	0	17	84	19
1669	19.4398	0.601975	0.258743	2.32654	0.0199898	0.0331368	54	44	86	4	47	22	4	0	0	4	82	84	121	67	75	68	102	5	9	10	11	8	71	26	29	92	48	69	5	4	13	10	2	133	5	6	4	27	72	1	21	82	9
1670	20.8067	0.92703	0.201007	4.61194	3.9893e-06	1.10019e-05	74	45	75	12	52	24	8	4	1	10	89	75	143	86	71	72	92	4	10	9	18	8	78	15	24	111	48	79	6	3	6	6	0	136	6	8	6	34	77	0	16	85	10
1671	21.08	0.768762	0.225743	3.40548	0.000660488	0.00137936	67	48	103	9	54	19	2	6	1	4	88	77	149	75	97	81	86	8	6	13	14	5	71	21	29	84	58	84	5	2	10	9	0	128	6	13	2	18	71	0	28	92	13
1672	22.8365	0.81831	0.207973	3.93469	8.33052e-05	0.000198962	86	37	95	13	65	30	5	6	1	7	100	81	148	74	99	85	104	1	9	12	31	8	88	20	24	94	53	96	4	3	9	12	0	132	7	15	4	38	75	2	21	77	17
1673	23.9814	0.774387	0.216521	3.57651	0.000348218	0.000762115	91	40	112	12	79	26	4	7	0	5	105	91	164	72	85	97	118	4	8	13	23	15	113	19	33	109	62	89	5	4	7	17	3	150	14	8	7	30	78	1	20	91	13
1676	26.6102	0.8706	0.236573	3.68005	0.00023319	0.000523402	80	66	112	17	66	22	10	1	0	11	127	90	190	99	88	74	106	5	8	16	33	10	116	27	29	113	65	88	4	9	10	13	1	170	9	11	7	34	94	2	34	108	16
1677	26.1446	0.757245	0.208625	3.62969	0.000283757	0.000627735	109	46	100	10	67	26	4	9	0	8	136	111	188	107	107	85	124	7	6	23	17	9	101	17	32	136	58	103	7	7	9	12	1	173	11	8	2	40	125	1	24	108	21
1678	29.695	0.834941	0.226069	3.69329	0.000221367	0.000497773	100	75	126	20	74	26	9	2	0	10	114	95	192	99	104	107	122	11	7	11	24	9	99	18	43	137	62	111	6	5	15	13	3	194	15	11	6	42	122	2	18	109	20
1679	29.5896	0.798618	0.213392	3.7425	0.000182202	0.000415786	105	64	132	19	86	34	6	9	0	4	115	106	184	101	129	98	152	6	3	19	15	11	116	32	46	173	70	135	9	6	7	18	0	222	11	16	6	37	127	3	32	105	17
1680	30.4942	0.974158	0.199133	4.892	9.98145e-07	2.93011e-06	106	76	142	12	91	44	7	5	1	12	143	105	193	120	127	115	135	6	9	17	30	9	109	12	35	153	79	142	2	6	9	11	0	215	13	12	10	47	114	2	34	108	15
1681	33.2294	0.66045	0.22937	2.8794	0.00398426	0.00729263	106	64	135	18	87	18	12	4	0	8	142	119	248	128	138	118	156	6	7	19	35	12	127	24	35	166	67	122	2	9	14	27	3	221	16	17	5	35	116	4	24	131	18
1682	33.1684	0.733228	0.218449	3.35652	0.000789303	0.00163717	122	64	152	16	99	40	1	5	0	13	153	108	246	121	159	135	152	9	5	19	33	9	124	27	46	179	95	144	8	5	12	17	2	228	15	12	3	34	122	5	30	121	17
1683	35.5077	0.888701	0.188547	4.71342	2.43591e-06	6.91956e-06	136	70	168	21	75	48	7	7	2	7	165	119	234	115	118	116	130	3	9	19	20	11	137	20	48	175	100	137	9	6	17	17	1	216	12	19	8	47	144	3	38	114	23
1684	35.149	0.626029	0.20955	2.98749	0.00281275	0.00529004	139	68	178	19	89	36	5	3	0	7	152	127	256	155	136	123	155	10	15	16	26	18	138	40	52	173	96	152	11	8	15	19	1	252	13	22	9	36	151	1	45	140	20
1685	37.4739	0.950259	0.190065	4.99967	5.74299e-07	1.71453e-06	158	79	155	22	103	49	10	8	1	14	151	146	275	136	158	107	171	6	6	21	39	11	145	28	49	194	106	179	6	9	7	26	1	268	16	10	6	47	157	4	41	137	17
1686	42.8484	0.866664	0.202128	4.2877	1.80529e-05	4.62606e-05	123	86	192	21	98	42	15	8	4	11	150	133	278	135	183	137	195	6	8	20	46	11	143	34	55	189	115	177	8	6	17	15	2	288	15	23	7	44	165	3	40	134	27
1687	42.4067	0.715454	0.192088	3.72462	0.000195613	0.000443919	127	83	148	21	100	53	10	6	2	11	199	136	317	137	180	125	199	12	17	25	39	11	158	34	53	192	124	191	12	9	16	19	1	277	14	23	9	46	199	3	35	176	27
1688	41.4514	0.760367	0.196415	3.87123	0.000108287	0.000253217	142	86	158	22	110	51	13	6	1	12	175	129	336	160	153	141	205	13	11	17	40	14	171	42	53	230	107	200	9	5	16	14	3	285	18	22	14	53	175	1	36	172	20
1689	44.9456	0.654266	0.188736	3.46657	0.000527137	0.00111982	137	88	190	22	106	50	10	5	1	17	166	130	346	175	161	159	189	10	12	25	39	20	185	43	70	236	110	191	7	13	10	20	1	301	15	29	8	50	190	4	45	158	32
1690	43.2371	0.638	0.192876	3.30782	0.000940236	0.00191472	161	72	193	25	104	48	9	6	0	15	179	141	317	172	162	159	218	9	11	23	49	11	217	30	55	239	128	180	11	8	16	21	2	296	19	25	7	52	199	4	50	169	28
1691	49.863	0.711217	0.190419	3.73501	0.00018771	0.000427562	178	95	194	26	120	59	18	8	2	8	205	157	396	182	203	164	246	8	15	30	44	13	187	45	60	275	130	206	8	7	15	23	2	337	32	23	13	58	208	2	50	167	29
1692	51.6824	0.829491	0.171338	4.84126	1.2902e-06	3.75166e-06	165	86	208	30	158	42	20	12	2	21	219	179	389	213	197	172	240	9	17	28	52	19	214	38	71	293	136	202	7	8	17	32	3	313	23	26	10	59	219	1	51	174	26
1693	50.241	0.586208	0.160345	3.65591	0.00025627	0.000570004	201	74	185	31	134	53	18	8	0	10	222	172	406	210	220	170	258	11	15	33	57	19	217	37	75	294	144	249	7	9	15	27	2	319	21	31	7	79	254	2	60	181	35
1694	54.3744	0.771061	0.160167	4.81412	1.47853e-06	4.24906e-06	193	93	218	30	146	56	10	15	2	21	227	198	426	195	216	176	300	14	19	35	43	29	232	46	83	291	148	243	12	9	16	21	3	332	21	25	7	63	245	1	59	206	32
1695	57.2337	0.846847	0.158692	5.33643	9.47967e-08	2.94444e-07	186	99	237	36	159	64	12	14	3	21	222	229	480	210	238	178	276	13	19	23	56	18	216	42	66	341	148	273	13	8	16	27	5	334	16	31	8	64	255	1	76	196	32
1696	57.2746	0.6423	0.165175	3.88861	0.000100821	0.000237567	198	82	251	29	161	47	15	9	2	21	246	194	511	233	241	208	282	17	18	31	49	16	238	38	93	354	166	267	9	11	15	31	2	326	32	35	10	63	254	2	70	200	32
1697	62.1888	0.777694	0.159648	4.87131	1.10861e-06	3.24664e-06	199	120	237	31	162	69	17	12	2	28	233	204	526	257	247	181	315	19	20	29	49	24	291	38	82	382	185	302	7	12	18	38	4	367	19	28	11	59	255	3	92	225	31
1698	63.4341	0.653452	0.145939	4.47756	7.55027e-06	2.0145e-05	212	98	243	31	149	78	18	12	1	22	262	227	524	253	240	203	350	17	14	46	62	23	302	41	96	367	189	289	10	18	12	38	2	326	21	27	14	83	319	5	89	247	30
1701	65.7009	0.571375	0.141303	4.04361	5.26345e-05	0.000128709	229	96	256	36	189	81	22	9	1	16	270	209	640	274	318	218	394	18	26	41	58	33	323	36	99	405	188	337	10	14	18	26	1	414	14	31	26	88	338	3	65	230	34
1702	69.4332	0.617261	0.140778	4.38465	1.16171e-05	3.02733e-05	244	95	266	37	183	91	20	18	0	22	299	230	715	312	306	229	412	18	26	46	70	28	328	48	122	461	223	364	9	16	17	22	5	433	18	35	12	92	370	3	74	270	44
1703	71.8106	0.370285	0.146374	2.52971	0.0114156	0.0194747	230	82	276	33	194	72	17	8	0	24	277	253	793	308	318	218	457	16	24	41	74	31	326	50	119	470	232	375	15	17	29	43	1	453	20	41	20	99	336	3	102	283	45
1704	73.5991	0.517047	0.12145	4.25727	2.06939e-05	5.26482e-05	241	92	290	49	209	79	18	18	1	16	290	260	726	364	310	233	440	21	22	50	74	30	348	43	130	470	217	406	10	8	18	37	1	407	18	39	18	103	389	4	97	279	45
1705	77.165	0.473418	0.127375	3.71672	0.000201822	0.000457166	250	92	284	32	223	86	22	16	3	24	283	240	819	351	350	232	479	17	25	37	79	48	381	42	123	541	245	462	12	13	20	46	0	411	34	30	10	113	405	2	90	292	40
1707	81.5007	0.46102	0.114854	4.01395	5.97098e-05	0.000144858	238	102	270	48	227	101	22	21	2	16	309	271	880	408	339	293	515	25	21	56	77	39	430	40	143	548	262	435	11	12	15	39	6	449	17	48	24	128	426	1	116	324	40
1708	82.9509	0.34861	0.115001	3.03135	0.00243459	0.00465715	249	88	283	44	252	93	21	14	1	16	326	266	835	432	355	302	537	17	33	52	82	38	444	45	144	589	311	464	9	15	28	29	4	458	23	41	20	124	429	3	103	365	50
1709	84.8977	0.406538	0.105654	3.84781	0.000119179	0.000277107	244	81	280	54	228	125	25	9	2	28	341	281	899	402	393	268	560	21	21	63	81	44	496	49	144	619	299	490	11	13	23	44	2	452	23	36	15	125	485	3	127	364	59
1710	90.4189	0.33602	0.104089	3.22821	0.00124569	0.00249543	286	74	302	37	241	100	22	25	2	25	357	251	960	468	350	309	601	22	24	55	74	46	498	44	178	650	314	486	18	10	25	35	6	465	31	33	17	148	496	6	116	380	42
1711	88.8472	0.305653	0.0994192	3.07439	0.00210936	0.00407302	297	66	283	54	273	124	13	17	1	20	348	306	1028	492	400	300	618	21	29	60	84	41	531	49	177	666	284	576	17	13	30	37	2	426	26	39	13	119	523	5	114	381	42
1712	100.33	0.309616	0.0977508	3.1674	0.00153806	0.00303176	303	94	288	62	263	114	29	16	4	22	322	296	1096	496	390	324	647	21	35	53	87	49	517	58	198	720	326	566	12	14	38	46	3	456	23	41	30	143	574	9	124	432	58
1713	96.443	0.254283	0.0943144	2.69612	0.00701529	0.0123622	282	80	285	61	241	114	32	16	0	28	353	273	1103	488	454	330	702	17	39	67	70	36	560	51	171	769	299	603	23	12	17	34	5	459	20	40	23	159	551	8	138	438	60
1714	101.926	0.261641	0.0822527	3.18094	0.00146796	0.00289823	298	51	301	48	273	148	29	25	4	30	332	317	1104	541	416	313	713	29	32	61	79	49	598	58	193	778	348	609	17	9	23	46	8	454	24	48	22	154	567	4	125	470	66
1716	102.463	0.202926	0.0960898	2.11184	0.0347003	0.0552153	298	73	283	60	315	145	28	11	0	32	335	334	1245	606	402	324	858	18	44	50	79	60	622	55	196	877	352	662	25	19	14	55	4	488	22	47	15	162	646	3	152	505	65
1727	123.337	-0.305278	0.0944272	-3.23295	0.0012252	0.00246241	301	41	236	46	376	121	32	20	1	23	275	310	1475	801	473	359	1203	38	41	64	72	79	912	72	314	1049	404	753	32	5	23	51	2	449	32	61	35	273	900	7	206	768	72
1728	127.036	-0.276916	0.108463	-2.5531	0.0106769	0.0184188	303	33	248	53	380	139	35	16	0	30	295	314	1524	902	484	381	1222	38	33	81	79	73	974	63	322	1118	389	801	24	14	10	50	7	471	23	57	27	253	926	9	218	827	105
1731	129.689	-0.253599	0.119979	-2.1137	0.0345408	0.0550327	305	21	224	71	368	152	30	26	0	35	289	311	1532	909	462	379	1286	35	33	67	77	77	1089	57	353	1122	449	763	23	18	17	49	8	434	17	49	39	272	932	5	243	829	95
1732	130.279	-0.367284	0.130428	-2.81599	0.00486268	0.00873152	266	20	217	67	382	133	26	24	0	30	272	332	1461	944	417	329	1423	33	45	49	87	91	1104	51	341	1121	443	789	21	20	14	43	7	408	26	54	26	261	969	7	282	908	113
1735	132.677	-0.48699	0.142663	-3.41358	0.000641145	0.00134346	282	19	189	57	333	127	37	22	1	25	212	326	1435	934	444	368	1437	39	36	64	56	106	1136	51	376	1134	477	800	36	14	12	49	9	380	23	49	28	322	987	5	285	963	127
1736	131.722	-0.526685	0.143805	-3.66248	0.000249783	0.000557592	252	28	143	56	325	126	37	18	0	30	234	304	1426	1066	431	344	1437	41	39	59	68	97	1160	48	391	1133	420	790	32	13	10	44	7	408	29	39	49	291	990	7	257	960	125
1737	132.128	-0.550516	0.153712	-3.58147	0.000342	0.000749116	260	25	165	52	343	105	29	24	1	33	202	281	1466	1063	425	340	1406	36	42	67	71	86	1239	48	379	1141	467	768	35	7	10	49	6	387	22	42	40	335	1115	8	267	1086	119
1740	130.753	-0.851646	0.170803	-4.98613	6.16003e-07	1.83458e-06	223	13	133	53	332	93	22	10	0	24	205	285	1389	1048	382	352	1518	44	38	54	58	105	1240	43	400	1171	426	770	44	13	10	45	6	373	25	40	30	363	1017	9	299	1061	108
1741	128.847	-0.743346	0.160874	-4.62066	3.82515e-06	1.05967e-05	248	18	146	44	308	103	29	14	0	25	199	283	1314	1030	380	340	1553	37	33	61	64	128	1222	46	370	1126	400	755	27	12	12	52	10	372	16	47	31	323	1076	3	295	1015	114
1743	126.988	-0.864442	0.172879	-5.00028	5.72468e-07	1.71323e-06	212	14	121	43	282	107	26	15	2	19	157	251	1282	1059	377	323	1571	39	43	75	53	107	1251	38	389	1165	458	712	28	9	18	50	3	348	15	51	46	360	1082	4	280	1110	129
1744	125.238	-0.955268	0.178202	-5.36059	8.29521e-08	2.59621e-07	197	17	100	35	279	85	28	11	1	21	165	230	1222	1023	376	342	1456	39	39	64	64	108	1191	35	406	1131	438	660	26	6	14	41	10	305	13	39	30	321	1050	9	272	1094	124
1747	124.622	-1.11395	0.183309	-6.07689	1.22539e-09	4.12939e-09	195	12	100	30	239	89	32	11	2	12	113	187	1155	974	385	323	1576	55	43	72	40	115	1223	42	417	1008	410	626	40	12	12	41	8	310	22	44	36	366	1007	5	302	1024	127
1748	122.245	-1.12262	0.183837	-6.10657	1.01793e-09	3.4492e-09	160	15	97	25	238	88	15	16	1	24	112	198	1189	947	376	311	1538	41	31	49	55	92	1195	32	374	991	380	700	36	10	11	39	9	287	19	34	45	353	1061	7	296	1086	146
1749	117.709	-1.10832	0.194082	-5.71056	1.12606e-08	3.68366e-08	159	13	106	36	213	64	26	15	1	15	133	164	1175	1000	356	289	1512	36	29	46	38	97	1087	32	383	1060	385	616	28	8	9	39	6	259	17	35	42	332	1008	7	292	987	126
1750	121.498	-1.30359	0.183922	-7.08772	0	0	162	12	72	43	227	71	12	10	0	18	118	156	1073	915	376	306	1422	46	31	63	50	91	1137	54	372	1010	422	678	37	14	20	32	14	289	15	32	30	346	1006	7	317	1077	118
1751	111.338	-1.22908	0.192628	-6.38057	1.7643e-10	6.27193e-10	126	22	76	39	186	76	12	8	0	21	102	157	1057	812	328	245	1413	36	37	48	32	89	1080	38	353	996	360	587	33	7	13	38	8	232	16	41	27	324	944	7	277	1066	122
1752	107.314	-1.37369	0.193333	-7.10528	0	0	143	9	71	38	179	61	10	8	0	15	107	151	1016	881	348	273	1358	28	30	56	32	101	1115	39	349	945	406	625	24	11	19	33	4	244	23	38	35	337	965	3	286	1067	121
1753	109.016	-1.34673	0.198175	-6.79568	0	0	146	15	72	26	165	74	14	12	0	12	100	147	922	868	326	287	1429	35	27	65	37	107	1014	43	359	923	391	549	31	8	7	39	6	240	13	25	35	332	923	10	278	991	117
1754	107.018	-1.35683	0.197621	-6.86581	0	0	125	10	56	27	181	57	20	9	2	11	84	154	931	832	323	277	1288	39	32	48	45	82	1092	31	365	894	368	600	26	5	16	29	9	216	12	33	34	332	951	7	266	980	108
1755	104.892	-1.41973	0.209378	-6.78069	0	0	97	4	75	19	163	66	30	3	1	14	72	138	878	777	325	267	1311	34	34	47	48	87	1040	52	330	829	388	538	29	6	11	37	8	202	12	36	45	289	848	7	295	1008	116
1757	96.7263	-1.56922	0.199879	-7.85083	0	0	84	12	66	24	121	44	9	7	2	16	75	95	804	718	305	258	1211	41	24	50	37	87	958	28	339	839	326	505	22	7	14	25	5	208	13	29	27	295	888	6	276	939	108
1762	82.2039	-1.83965	0.202426	-9.08805	0	0	78	15	32	15	77	47	7	4	0	10	56	71	671	577	267	223	1008	27	33	28	34	72	835	38	285	719	298	443	23	9	9	31	3	177	17	22	32	262	717	4	244	793	85
1763	79.7831	-1.90495	0.210047	-9.0692	0	0	61	8	42	11	84	35	10	6	1	9	45	59	619	548	322	212	956	24	26	47	31	77	779	36	303	665	291	438	9	10	9	18	6	153	9	24	24	265	672	3	239	814	84
1764	78.0089	-2.06863	0.203692	-10.1557	0	0	57	11	41	15	66	36	10	3	0	6	38	42	538	532	266	199	970	33	30	37	41	72	758	40	306	640	280	426	18	6	9	31	4	169	11	26	25	247	681	5	216	747	83
1765	78.4894	-1.84269	0.20505	-8.98652	0	0	59	12	41	19	53	29	7	9	1	9	35	80	562	517	269	208	939	32	26	39	45	65	725	22	275	625	270	368	23	5	11	33	5	144	11	23	26	263	615	5	231	679	83
1766	72.8219	-1.87922	0.213839	-8.78802	0	0	52	8	42	16	68	31	13	4	1	5	42	51	512	480	236	217	815	25	27	32	33	58	704	33	244	566	247	379	16	4	12	19	3	146	11	16	23	211	616	8	219	693	77
1767	70.8383	-1.95929	0.206846	-9.47222	0	0	60	9	36	20	61	26	9	3	0	8	26	52	510	431	260	173	789	29	28	42	32	60	612	37	261	597	257	365	20	3	12	26	1	132	11	24	24	234	589	8	160	694	74
1768	67.2832	-2.02961	0.231159	-8.78015	0	0	50	4	27	18	62	26	13	3	0	6	27	33	478	439	240	188	781	28	30	39	31	60	630	31	249	519	244	343	18	8	7	20	5	110	9	12	19	217	532	2	189	634	86
1769	66.9498	-2.01271	0.228741	-8.79905	0	0	32	7	29	15	45	28	9	7	1	6	34	38	429	386	234	172	778	29	22	46	22	65	613	24	245	462	235	303	20	4	10	14	2	131	12	20	26	186	502	8	189	580	91
1770	67.8134	-2.24237	0.235128	-9.53681	0	0	35	2	23	13	44	29	12	3	0	7	26	30	420	383	213	178	681	33	26	32	33	65	592	30	252	482	216	305	23	3	7	28	4	117	16	18	20	215	519	10	184	557	82
1771	61.4895	-2.02241	0.236845	-8.53896	0	0	43	7	22	13	48	24	5	9	1	4	34	32	362	385	232	162	670	31	31	29	27	69	580	22	200	451	200	317	15	3	9	17	1	96	13	18	21	203	470	4	198	518	63
1772	59.2973	-2.43391	0.229663	-10.5978	0	0	34	3	21	8	47	13	7	2	0	5	28	38	364	342	202	158	662	30	17	34	26	61	521	29	208	449	217	302	26	6	9	24	3	107	7	13	25	190	426	2	171	494	52
1773	56.9086	-2.2324	0.22959	-9.72343	0	0	32	8	20	13	33	24	8	2	0	3	29	28	327	316	198	159	563	25	23	24	29	56	518	28	220	421	183	293	16	7	6	16	3	100	6	18	15	191	449	6	179	476	81
1774	54.8896	-2.03917	0.234177	-8.70781	0	0	35	11	25	12	43	21	5	5	0	7	18	27	314	289	180	147	592	17	29	37	24	55	500	23	199	354	180	273	14	3	8	20	3	108	13	12	18	201	433	3	182	448	79
1775	54.2337	-2.14901	0.235365	-9.13055	0	0	45	7	17	9	39	29	6	3	0	4	27	21	296	292	159	146	475	27	16	34	26	58	475	30	201	350	192	290	15	3	9	23	4	90	8	13	15	164	435	4	152	416	78
1776	52.9367	-2.45511	0.253172	-9.69741	0	0	30	5	13	9	46	11	9	1	0	4	20	12	251	262	164	129	479	29	20	33	27	60	429	30	181	349	202	261	16	4	4	19	6	88	11	17	18	161	387	4	154	407	73
1777	50.7432	-2.11051	0.25736	-8.20064	0	0	30	12	23	11	34	27	3	1	0	7	17	18	208	231	154	112	456	11	26	29	29	55	421	31	176	301	150	250	15	5	2	19	4	87	11	17	16	176	384	3	151	422	57
1778	51.3294	-2.03973	0.277168	-7.35919	0	0	17	12	18	12	28	29	7	2	0	8	16	10	216	238	166	148	436	29	21	30	15	48	375	25	188	296	170	248	13	4	6	21	6	86	7	10	18	157	338	3	163	389	69
1779	47.3308	-1.80385	0.253463	-7.11683	0	0	27	11	21	8	38	21	7	3	0	12	26	16	229	200	152	144	410	22	21	29	25	44	381	31	168	310	145	231	13	2	3	16	4	81	13	9	15	148	323	3	158	417	67
1780	47.2677	-2.06025	0.262332	-7.85361	0	0	20	9	20	4	29	16	2	7	1	9	22	27	214	213	149	114	362	21	24	28	29	48	400	28	176	264	154	235	10	3	10	19	2	82	11	14	15	157	316	1	134	340	72
1781	47.3406	-2.24632	0.263368	-8.52923	0	0	22	17	18	7	28	22	6	0	0	2	13	15	210	204	142	115	343	20	20	20	24	58	355	28	167	219	142	221	12	4	13	19	6	92	7	21	16	124	330	3	144	361	49
1782	41.7696	-2.53234	0.263358	-9.61557	0	0	17	7	16	11	26	19	2	1	0	1	9	8	166	199	140	104	340	26	17	22	21	33	350	29	128	215	137	231	8	6	9	13	2	102	14	11	12	130	264	3	130	323	63
1783	43.8361	-2.23701	0.273916	-8.16676	0	0	21	4	19	11	23	12	4	4	1	4	18	15	157	163	117	122	290	21	26	30	25	47	336	18	159	218	141	188	13	4	4	22	5	76	9	10	14	134	249	4	122	262	61
1784	40.9451	-2.22848	0.293647	-7.58899	0	0	14	6	15	10	22	18	5	2	0	6	14	9	154	170	117	90	281	23	16	21	17	51	356	29	130	189	141	219	13	6	7	7	2	60	12	10	13	128	266	0	147	272	54
1785	38.7614	-2.09497	0.279405	-7.49798	0	0	15	7	13	11	29	10	8	3	0	4	17	7	111	155	96	100	285	20	12	27	21	42	329	31	143	197	141	212	11	3	6	12	3	57	8	15	13	131	239	3	125	282	53
1786	37.4194	-2.2652	0.285817	-7.92537	0	0	11	8	11	11	19	10	4	3	0	4	18	10	154	144	100	105	275	22	20	25	16	45	294	26	167	175	112	196	9	4	4	15	2	68	6	10	12	120	254	2	122	247	68
1787	38.0321	-2.38111	0.295721	-8.0519	0	0	13	8	11	4	13	16	1	6	0	4	13	12	119	145	105	103	247	23	17	21	23	52	303	22	145	127	121	202	11	2	7	13	3	64	5	17	13	126	238	5	103	226	50
1788	35.8638	-2.16545	0.286145	-7.56765	0	0	14	6	11	8	23	15	8	3	0	2	9	9	116	135	84	73	212	17	19	33	26	24	289	21	132	139	139	190	11	2	7	11	4	67	9	15	13	111	239	3	78	202	55
1789	36.6373	-2.30196	0.310147	-7.42214	0	0	15	6	22	10	20	19	5	1	0	0	3	10	111	116	94	80	207	15	23	25	17	31	287	18	133	126	104	190	9	4	9	16	3	57	5	12	10	117	236	4	123	237	64
1790	35.8243	-1.95788	0.319622	-6.12563	9.03271e-10	3.07763e-09	10	7	5	12	23	20	5	5	0	3	11	6	101	113	92	90	182	9	26	18	20	34	249	28	120	119	103	205	10	5	4	14	3	47	7	14	7	103	184	3	112	203	45
1791	34.5641	-2.24009	0.3064	-7.31101	0	0	14	5	13	10	19	13	2	3	0	5	12	4	94	109	97	80	183	22	20	25	31	36	258	20	138	108	109	169	11	3	8	12	2	55	8	12	13	105	200	3	81	196	57
1792	31.3978	-2.47437	0.314036	-7.87924	0	0	13	4	11	5	22	14	3	1	0	1	14	4	79	102	72	78	195	12	11	33	20	43	253	30	127	118	97	146	9	1	5	19	5	40	5	17	9	99	205	3	94	183	43
1793	32.2814	-2.52382	0.323585	-7.79956	0	0	7	5	13	3	8	19	5	1	0	2	9	5	76	98	78	72	169	15	18	20	21	29	235	20	123	106	104	154	7	3	8	12	4	54	7	10	5	108	190	5	122	202	43
1794	31.7254	-2.67783	0.337141	-7.94277	0	0	10	3	10	3	10	16	1	2	1	2	10	6	74	106	85	77	149	21	13	16	28	34	252	24	130	97	90	158	7	5	4	16	1	52	6	21	6	104	181	4	76	156	53
1795	30.4875	-2.07323	0.335688	-6.17606	6.57217e-10	2.25175e-09	15	11	11	7	13	8	5	2	0	4	10	4	80	80	78	80	148	16	17	19	22	32	233	30	113	80	103	156	7	2	6	7	0	49	2	13	16	103	162	3	98	134	50
1796	29.0252	-2.19476	0.348985	-6.28897	3.19575e-10	1.11039e-09	2	6	16	9	17	9	4	1	0	4	10	6	90	76	75	61	155	16	13	20	23	58	242	31	130	69	96	160	9	1	2	14	0	42	6	8	5	99	166	2	80	140	49
1797	27.7679	-1.96814	0.335471	-5.86679	4.44302e-09	1.46512e-08	12	6	10	5	12	16	7	3	0	2	10	8	56	80	62	70	135	26	18	26	21	26	228	12	122	78	89	124	5	2	4	14	0	61	4	5	4	78	146	3	85	173	40
1798	28.5928	-2.13434	0.349782	-6.10191	1.04811e-09	3.54167e-09	4	7	9	9	16	14	2	0	0	6	9	4	68	77	57	50	133	16	18	22	14	22	232	29	114	59	76	154	5	4	8	10	3	36	7	8	5	108	127	2	95	154	45
1799	28.5166	-2.25983	0.362626	-6.23185	4.60967e-10	1.58377e-09	12	2	14	8	13	11	3	2	1	2	11	1	64	65	69	63	114	14	27	26	14	33	215	25	108	59	90	135	13	0	3	11	2	50	9	9	8	84	126	1	94	153	44
1800	27.1676	-1.88927	0.342857	-5.51038	3.58058e-08	1.14393e-07	12	8	10	12	8	15	1	2	0	5	10	5	66	82	60	52	113	14	15	21	17	33	213	22	119	49	78	137	8	4	5	13	2	43	8	6	5	103	128	1	71	149	27
1801	27.9052	-1.6287	0.346194	-4.70458	2.54389e-06	7.17658e-06	13	8	16	10	21	15	9	3	0	0	11	6	44	69	59	50	126	12	19	16	19	51	196	28	113	65	76	123	11	4	3	4	1	42	7	6	10	79	141	2	75	141	38
1802	26.7581	-2.34102	0.364128	-6.42912	1.28343e-10	4.57572e-10	8	4	11	4	10	12	3	2	0	3	8	9	47	64	59	49	98	14	18	21	9	25	193	18	120	56	82	123	2	5	2	17	1	45	2	15	7	70	136	2	66	132	57
1804	25.4118	-2.03084	0.361756	-5.61384	1.97883e-08	6.40516e-08	4	7	9	7	13	12	1	3	0	4	13	4	43	56	64	46	79	17	22	21	23	14	197	22	96	47	69	120	7	4	2	5	0	46	5	9	10	86	121	3	69	105	37
1806	23.4391	-2.1663	0.379476	-5.70865	1.13875e-08	3.71527e-08	8	4	8	3	14	14	4	1	0	4	4	4	47	61	52	53	69	17	18	20	11	33	177	21	104	46	87	124	8	1	1	9	1	28	4	7	4	62	118	0	69	107	33
1807	23.2232	-1.49456	0.382161	-3.91081	9.19861e-05	0.000219269	1	8	7	9	12	6	6	4	0	6	13	5	36	52	53	66	70	16	14	15	18	24	210	19	91	35	53	134	3	4	1	7	0	39	3	5	13	78	105	1	59	110	31
1809	25.0518	-1.84808	0.395619	-4.67136	2.99218e-06	8.3645e-06	2	6	11	3	7	16	1	3	1	6	12	5	25	56	37	41	76	16	10	15	13	26	157	20	105	41	57	109	4	5	3	16	1	36	6	9	3	90	98	4	73	91	38
1810	22.8033	-2.30328	0.380435	-6.05434	1.40993e-09	4.73831e-09	5	3	6	4	10	10	2	1	0	5	8	6	35	40	51	44	75	18	18	20	13	30	163	18	86	30	56	96	8	4	5	4	2	33	4	10	5	82	118	2	87	95	29
1811	22.5656	-2.52627	0.390447	-6.4702	0	3.50968e-10	6	4	4	2	12	6	2	2	0	3	7	5	22	40	54	36	67	14	15	13	10	25	164	19	97	41	68	105	6	1	5	6	2	46	6	5	7	58	109	4	90	93	30
1813	22.5469	-2.08024	0.386833	-5.37762	7.54782e-08	2.36832e-07	8	3	6	9	9	11	2	2	0	2	10	6	27	35	32	49	59	15	11	17	16	26	164	24	99	29	73	98	8	3	3	11	2	35	4	8	2	69	85	3	60	90	34
1814	21.5312	-2.39367	0.414777	-5.77098	7.88133e-09	2.59199e-08	8	3	6	1	12	6	4	1	1	2	8	0	22	27	37	46	64	10	8	11	10	18	153	29	88	35	67	115	6	3	3	5	2	42	8	9	5	71	88	3	45	82	36
1816	20.7001	-1.86794	0.39623	-4.71428	2.42566e-06	6.9064e-06	6	2	10	8	9	10	6	1	0	3	8	2	25	34	33	51	55	12	12	14	17	27	170	18	83	34	56	105	10	0	1	6	1	27	4	10	7	61	93	2	78	68	31
1817	22.5216	-1.99137	0.417641	-4.76813	1.85942e-06	5.3188e-06	5	8	2	9	9	11	3	1	0	1	6	8	18	36	49	37	47	13	15	17	18	33	133	32	77	28	51	91	5	0	4	2	4	32	4	7	5	68	92	5	61	98	32
1818	20.028	-1.75268	0.379636	-4.61674	3.89807e-06	1.07745e-05	7	7	8	8	10	13	2	3	0	1	12	2	24	46	42	38	52	8	12	13	14	25	143	22	70	38	72	112	5	3	7	6	1	26	4	7	7	56	86	0	49	85	37
1821	21.2912	-2.41153	0.434372	-5.55177	2.82791e-08	9.08179e-08	5	7	1	2	8	11	5	0	0	0	6	2	15	32	37	44	37	17	16	14	14	22	136	12	97	28	59	99	4	3	3	8	2	28	5	6	6	51	87	5	52	81	34
1822	18.974	-2.08457	0.442957	-4.70603	2.52589e-06	7.14216e-06	2	3	4	3	8	8	4	2	1	2	10	0	16	37	39	36	52	14	8	21	8	23	119	24	80	16	59	103	5	3	1	5	0	34	4	5	6	58	71	0	47	63	29
1823	17.5039	-2.22729	0.415794	-5.35671	8.47498e-08	2.63904e-07	1	2	2	9	9	10	3	0	0	0	9	3	20	41	45	43	41	10	11	17	12	15	133	17	67	25	62	94	10	0	2	10	2	25	4	9	4	36	76	1	43	64	31
1824	16.3903	-1.70874	0.425519	-4.01566	5.92791e-05	0.000144097	0	6	5	4	4	9	6	1	0	3	6	4	15	25	35	41	38	13	10	10	15	20	103	13	73	24	50	94	5	2	1	4	1	25	5	5	7	58	66	0	38	62	24
1827	18.5773	-2.02868	0.419557	-4.83529	1.3295e-06	3.84772e-06	6	5	8	4	9	8	0	3	0	3	7	4	20	32	24	45	31	8	13	20	6	24	115	25	69	20	53	96	7	2	2	4	0	32	1	10	7	68	72	4	55	72	31
1828	18.756	-1.70299	0.436882	-3.89804	9.69736e-05	0.00022938	5	7	5	5	10	11	6	0	0	3	3	3	10	28	33	33	40	11	11	13	10	16	133	17	77	14	44	86	6	1	2	14	3	29	2	4	9	40	71	1	45	58	31
1829	17.7764	-2.19458	0.423134	-5.18647	2.14314e-07	6.54111e-07	5	3	3	4	8	9	2	1	0	2	10	3	17	25	26	32	42	7	12	18	7	21	156	18	85	26	46	89	2	3	5	5	3	33	3	4	5	42	62	3	34	78	28
1830	15.5901	-2.13173	0.429142	-4.96742	6.78497e-07	2.01097e-06	5	4	4	3	5	6	2	2	0	3	5	1	13	22	30	29	31	17	11	12	15	17	107	16	85	20	53	81	5	3	1	5	1	23	1	4	2	53	67	0	45	77	25
1831	17.7401	-1.94154	0.449179	-4.32241	1.54331e-05	3.98797e-05	5	5	4	1	2	17	3	1	0	4	5	1	16	21	21	34	31	18	11	16	11	20	119	19	77	18	48	91	11	1	3	6	1	20	6	5	5	45	55	0	40	62	37
1833	17.5338	-2.42148	0.470179	-5.15013	2.60312e-07	7.92535e-07	5	0	3	8	7	5	2	1	0	1	7	2	9	26	19	23	27	6	7	9	11	22	141	30	70	16	45	85	11	1	1	6	2	22	3	6	2	62	73	3	55	61	31
1835	15.0177	-1.74798	0.436088	-4.00831	6.1155e-05	0.000148072	2	5	3	5	4	9	2	2	0	4	2	4	13	22	32	30	24	8	11	18	17	22	101	17	65	30	44	65	4	1	2	5	1	22	4	6	1	57	48	1	36	60	23
1836	16.6558	-2.01519	0.451591	-4.46243	8.10349e-06	2.14812e-05	3	4	7	2	7	13	1	1	0	4	5	2	14	26	18	28	19	12	14	11	9	19	102	19	97	15	49	73	6	3	9	4	0	21	6	5	4	43	43	1	54	60	28
1837	14.257	-1.93551	0.455791	-4.24648	2.17152e-05	5.48454e-05	4	4	6	3	8	8	3	0	0	3	5	2	10	24	26	31	23	7	8	12	5	26	127	14	72	21	42	81	8	1	0	3	0	15	3	4	3	42	51	0	49	57	30
1838	16.8497	-1.83298	0.442609	-4.14131	3.45331e-05	8.61576e-05	3	7	8	4	6	9	3	0	0	3	10	1	7	32	19	35	31	5	14	10	15	18	101	13	76	14	46	60	6	2	4	5	2	18	6	5	4	45	58	1	50	49	29
1839	15.8555	-1.90968	0.44959	-4.2476	2.16075e-05	5.46856e-05	2	7	12	5	3	8	3	1	0	1	2	0	15	23	17	32	26	13	11	13	11	16	92	17	68	14	50	76	6	2	2	7	1	29	4	8	3	33	47	1	43	54	26
1841	15.2819	-2.04098	0.459298	-4.44369	8.84275e-06	2.33905e-05	4	3	5	4	4	9	4	0	0	3	2	0	9	25	19	20	27	13	10	8	12	13	99	12	73	20	52	69	8	2	3	6	1	16	2	9	5	48	53	0	42	55	22
1843	13.6413	-2.58226	0.471695	-5.47443	4.3893e-08	1.39145e-07	4	1	4	4	3	5	1	0	0	1	6	4	9	10	27	18	29	12	9	9	9	14	92	10	68	11	29	75	2	1	3	4	1	17	6	3	1	43	49	2	45	49	22
1844	13.5461	-1.64533	0.437334	-3.76218	0.000168436	0.000385803	3	2	4	4	8	9	4	3	0	1	4	4	9	24	25	26	20	7	6	9	10	18	87	11	61	13	41	79	3	1	2	3	2	12	5	5	6	47	51	1	34	50	26
1847	13.5684	-2.07695	0.471396	-4.40595	1.05322e-05	2.76217e-05	3	4	5	4	5	5	0	2	0	2	7	3	3	20	22	23	26	13	10	14	16	15	101	18	45	9	46	46	7	0	3	5	0	18	5	4	3	41	54	0	32	42	27
1848	12.9983	-1.84441	0.481419	-3.8312	0.000127519	0.000294828	2	4	2	5	2	5	1	2	0	4	4	0	7	18	24	21	20	6	9	12	12	11	93	14	69	14	40	75	6	0	3	9	1	18	0	4	5	41	60	0	48	46	20
1849	13.4513	-1.46013	0.492238	-2.96632	0.00301388	0.00564242	1	5	4	10	3	6	4	0	0	3	1	2	8	10	20	34	24	9	9	13	11	21	98	11	69	14	33	50	4	1	0	5	2	14	1	2	2	43	36	1	43	47	26
1850	13.0939	-1.16867	0.461612	-2.5317	0.0113509	0.0194182	3	6	4	7	6	5	6	2	0	2	5	4	8	14	19	23	16	15	8	10	9	20	97	15	42	14	33	63	3	1	1	1	1	20	7	1	3	38	37	1	28	44	19
1851	13.9118	-1.83962	0.474195	-3.87945	0.000104692	0.000245278	0	2	6	7	9	4	1	1	0	4	6	2	8	14	15	14	18	5	10	15	10	16	94	16	61	12	43	65	6	3	2	4	1	17	4	6	2	59	51	1	23	50	29
1852	12.5127	-1.59788	0.495171	-3.22692	0.00125131	0.00250261	1	3	5	3	3	5	5	2	0	3	3	1	3	13	17	15	14	10	8	10	17	19	85	17	62	8	38	56	3	1	2	1	0	19	3	2	4	39	40	1	30	37	20
1854	12.3232	-1.83049	0.454643	-4.02622	5.66805e-05	0.000138054	3	3	6	7	2	7	2	1	0	1	5	1	8	16	20	17	20	7	12	8	8	11	83	12	64	11	37	57	3	1	4	4	1	22	3	3	3	34	56	1	26	49	23
1855	12.3028	-1.63972	0.473134	-3.46566	0.000528937	0.00112171	5	3	2	5	4	6	2	2	1	1	7	1	9	19	17	26	21	8	12	11	13	15	99	12	53	9	32	51	1	1	1	2	0	10	4	4	2	23	37	1	29	33	20
1856	11.9117	-1.91955	0.473656	-4.05263	5.06455e-05	0.000124092	4	3	6	4	1	6	3	0	0	2	4	4	13	13	11	20	12	8	4	12	18	16	74	10	68	15	43	70	5	0	5	2	1	15	3	3	0	42	52	0	34	43	16
1857	12.0031	-2.62913	0.496097	-5.29962	1.16042e-07	3.57723e-07	2	2	2	1	2	4	2	2	0	1	1	3	11	19	13	24	21	13	14	5	7	18	75	12	55	12	31	64	2	3	3	2	0	12	2	3	5	38	35	0	28	47	19
1858	11.8059	-1.56184	0.458627	-3.40546	0.000660525	0.00137936	2	3	5	5	4	9	2	2	0	2	7	3	5	20	25	21	15	8	7	10	12	9	81	15	55	9	34	67	1	2	2	8	0	15	5	2	3	45	45	0	28	50	21
1859	11.4773	-2.30428	0.504387	-4.56847	4.91304e-06	1.33992e-05	0	1	7	3	4	11	0	0	0	1	4	0	9	11	19	15	11	8	6	7	8	15	81	15	48	6	31	57	3	2	1	4	1	15	3	3	4	32	31	2	29	30	20
1860	11.2838	-1.55577	0.484477	-3.21124	0.00132162	0.0026304	2	4	5	3	2	8	3	0	0	4	7	0	4	17	15	25	16	5	9	7	7	14	98	14	55	7	29	62	1	0	1	4	1	12	1	5	5	44	40	1	24	41	20
1861	11.6003	-2.09429	0.503062	-4.16308	3.1398e-05	7.87393e-05	0	5	2	1	3	9	2	0	0	2	2	2	5	12	20	22	15	5	10	13	6	16	74	11	57	6	37	63	6	0	3	2	1	16	6	4	6	39	43	1	38	42	24
1862	11.9391	-2.39973	0.513782	-4.67072	3.00146e-06	8.37141e-06	2	0	3	5	3	2	1	1	0	3	1	2	6	15	14	19	12	8	10	10	9	13	91	12	55	9	38	56	3	1	1	3	1	8	4	4	4	27	31	2	43	42	18
1863	10.1383	-2.15924	0.502852	-4.29399	1.75488e-05	4.51568e-05	0	4	3	2	3	7	2	0	0	1	2	1	4	17	7	14	12	10	6	11	6	12	59	12	38	8	21	59	2	2	2	6	0	18	2	2	4	31	23	0	31	44	17
1865	11.46	-1.61597	0.498904	-3.23904	0.00119934	0.00241438	2	2	1	5	4	6	2	2	0	3	1	4	6	13	11	19	19	10	7	10	4	12	78	8	56	4	24	58	1	0	1	7	2	19	3	1	1	30	36	2	31	42	13
1866	10.6262	-2.88191	0.534343	-5.39338	6.91432e-08	2.17509e-07	1	1	3	0	2	4	1	0	0	2	4	1	3	16	12	13	8	9	11	13	3	13	74	7	52	9	30	58	1	1	2	3	2	12	5	2	4	38	27	0	32	37	14
1867	9.94813	-1.54792	0.511853	-3.02415	0.00249336	0.00473277	1	4	2	4	2	8	3	1	0	2	2	0	4	16	14	16	9	9	8	9	7	16	62	13	52	10	34	50	2	1	0	3	0	9	0	6	1	35	37	0	31	37	11
1868	9.1947	-1.75325	0.529016	-3.31418	0.000919125	0.00187483	1	2	3	4	1	8	1	0	0	3	3	2	5	13	13	16	12	3	7	6	9	14	81	6	42	3	38	45	2	0	3	2	0	8	0	4	0	30	29	1	28	27	17
1869	11.1436	-1.8702	0.541716	-3.45236	0.000555708	0.00117242	3	3	5	1	2	6	1	0	2	2	3	0	5	11	13	14	14	6	12	12	8	16	65	12	43	6	17	54	5	0	2	2	0	14	2	2	3	26	37	0	25	39	15
1871	10.1176	-1.34069	0.500878	-2.67669	0.00743544	0.0130651	3	3	2	6	1	9	2	1	0	3	4	1	3	12	9	12	11	10	0	9	6	8	56	8	41	8	31	52	3	0	2	4	1	9	1	6	2	33	32	0	33	25	12
1872	10.3687	-1.17764	0.526762	-2.23562	0.0253765	0.0415067	1	2	3	2	2	8	6	1	1	2	5	0	5	12	4	13	10	6	13	8	7	5	64	8	45	7	35	57	1	1	2	2	0	9	4	1	0	28	32	1	19	35	11
1873	10.2139	-1.32801	0.524495	-2.53198	0.0113419	0.0194182	3	6	0	1	1	10	5	1	0	2	3	2	1	13	13	19	12	10	6	9	4	18	62	12	42	9	28	60	3	0	0	5	0	15	2	4	3	28	24	0	26	27	17
1874	9.56292	-1.49801	0.52576	-2.84923	0.00438256	0.00792728	0	7	1	2	1	6	3	0	0	2	5	2	5	9	7	11	15	8	5	9	7	14	65	11	53	8	31	40	4	0	2	1	0	9	0	3	2	19	20	3	25	28	7
1876	9.1727	-2.79709	0.526865	-5.30894	1.10267e-07	3.40775e-07	2	2	2	1	3	5	0	1	0	0	2	0	5	13	17	24	11	5	5	8	16	10	74	10	40	6	27	50	2	0	4	4	0	10	1	3	6	25	27	0	27	21	20
1877	10.4988	-1.67012	0.513214	-3.25424	0.00113696	0.00230389	1	3	5	2	4	5	1	3	0	2	4	1	3	13	17	10	9	13	8	6	6	3	67	16	47	7	20	46	1	2	2	2	0	13	2	2	1	22	34	3	26	27	21
1878	8.67976	-1.86859	0.528262	-3.53725	0.000404322	0.00087865	0	3	2	2	9	4	2	0	0	1	6	2	4	12	9	10	12	11	2	8	4	10	54	12	44	6	25	51	3	0	0	1	1	12	3	2	2	28	22	0	25	33	12
1880	9.52377	-1.56212	0.54029	-2.89127	0.0038369	0.00705439	1	1	0	8	1	6	0	1	0	4	1	1	5	12	11	12	8	3	10	4	7	14	63	10	48	4	21	48	2	0	1	6	0	14	7	2	2	20	20	2	25	43	12
1881	10.8974	-1.50754	0.534125	-2.82244	0.00476591	0.00857028	0	1	6	4	4	4	2	3	1	1	3	1	3	7	8	11	10	4	6	10	5	15	47	17	45	5	29	51	2	1	1	1	0	10	4	7	3	12	20	3	19	40	14
1883	8.51604	-1.546	0.540782	-2.85882	0.0042522	0.00770281	0	1	1	3	4	2	3	1	0	4	3	3	3	8	8	12	7	4	7	10	7	12	54	8	53	7	30	43	2	0	1	2	0	9	3	1	1	23	17	0	41	32	15
1884	8.8461	-2.77737	0.560505	-4.95511	7.22881e-07	2.13736e-06	0	1	4	2	1	1	1	1	0	1	1	2	3	11	9	18	6	8	8	9	6	11	53	13	39	2	22	48	2	1	2	3	0	10	0	4	2	20	33	0	14	39	16
1885	8.67225	-2.22658	0.592051	-3.76079	0.00016938	0.000387245	3	3	2	0	2	3	0	2	0	2	2	0	4	11	9	7	5	11	6	6	5	21	56	15	36	3	29	46	1	1	0	1	0	7	0	4	1	21	24	1	18	27	10
1886	9.99777	-2.53308	0.556175	-4.55446	5.25201e-06	1.4229e-05	0	1	1	2	1	6	2	0	0	1	3	1	1	8	10	6	12	6	16	8	4	10	52	6	36	4	26	36	6	1	1	5	0	9	3	9	3	23	26	2	29	32	13
1887	8.93264	-1.97765	0.55427	-3.56802	0.000359686	0.000785814	0	1	1	4	2	7	0	0	0	3	2	3	3	15	6	10	6	1	7	8	8	13	63	9	39	3	26	47	3	1	1	3	0	6	1	2	3	21	17	2	28	29	15
1888	8.94942	-1.7968	0.552687	-3.25103	0.00114986	0.00232238	0	1	3	5	1	6	0	1	0	3	1	1	2	7	11	10	9	6	6	4	7	8	49	9	36	1	24	50	2	0	1	2	2	9	3	1	3	26	23	0	9	31	14
1889	8.11712	-1.99676	0.538432	-3.70847	0.000208519	0.000470603	1	3	2	3	2	5	0	2	0	0	3	0	4	10	9	11	6	7	4	2	9	10	54	12	33	6	26	45	2	0	1	3	1	3	2	3	5	31	18	1	22	27	14
1890	8.12055	-2.14406	0.539622	-3.97326	7.08948e-05	0.000169982	0	1	2	3	4	6	0	0	0	2	1	3	4	13	10	15	5	4	3	4	9	19	45	12	51	1	27	32	3	1	1	2	0	13	2	3	2	14	28	1	18	22	10
1891	7.69674	-1.95623	0.548501	-3.5665	0.000361787	0.000789003	0	1	2	3	2	4	0	1	0	3	2	1	4	6	11	11	6	6	5	6	4	10	47	8	41	2	28	36	3	1	0	3	0	8	2	1	2	25	30	1	21	36	10
1892	9.45223	-1.79241	0.578972	-3.09585	0.00196249	0.00380135	0	1	1	4	2	9	4	0	0	0	1	1	9	8	4	8	6	8	9	9	6	11	43	6	41	1	18	39	3	1	1	2	3	13	2	1	1	24	17	1	18	33	16
1893	8.71159	-2.30802	0.584735	-3.94712	7.90973e-05	0.00018928	1	4	1	3	0	5	0	1	0	0	0	1	5	7	5	16	5	7	9	9	8	7	46	16	44	4	22	40	4	2	1	2	0	7	1	0	3	17	28	2	25	34	8
1894	6.97368	-1.5269	0.558591	-2.73348	0.00626682	0.0111229	1	2	0	1	0	4	2	1	0	4	2	1	3	9	5	6	5	3	5	5	4	11	48	6	35	3	26	40	0	1	3	3	0	8	4	3	2	16	21	0	13	23	14
1895	8.7625	-1.0505	0.529628	-1.98347	0.0473145	0.0734808	1	6	1	3	3	10	3	2	0	1	0	0	4	9	9	13	8	6	5	3	5	12	55	9	38	3	18	50	2	3	1	2	1	9	1	4	2	19	18	1	15	21	13
1896	7.35894	-2.33373	0.571871	-4.08087	4.48682e-05	0.000110376	0	0	3	3	1	5	0	0	0	2	2	0	2	6	7	8	7	6	8	8	5	10	48	13	40	1	24	32	2	1	1	3	1	14	3	1	3	18	24	0	21	27	9
1897	8.09109	-1.78554	0.547351	-3.26215	0.00110572	0.00224428	1	2	1	4	5	2	2	0	0	2	4	1	6	5	13	5	6	7	7	9	8	12	51	10	28	2	17	37	3	0	0	2	1	5	2	1	3	19	28	0	11	30	13
1898	7.51269	-2.28004	0.610927	-3.73211	0.000189886	0.000431719	0	3	1	2	1	6	1	0	0	0	0	1	2	7	10	9	10	9	6	5	1	9	55	7	47	0	20	39	4	0	4	5	0	8	2	1	2	22	16	1	18	12	8
1900	8.42664	-1.62776	0.586675	-2.77456	0.00552766	0.00986796	0	5	1	4	2	1	0	1	0	3	3	0	1	7	5	9	2	7	8	6	5	10	40	12	33	0	13	34	3	0	3	1	1	9	3	4	1	23	16	1	19	26	11
1901	7.07397	-2.05038	0.612611	-3.34696	0.000817037	0.00168053	0	4	2	2	0	3	1	1	0	0	1	0	1	6	9	8	4	5	6	4	3	11	31	8	31	3	19	32	3	0	1	2	0	4	2	0	1	11	31	2	15	23	12
1902	6.89829	-1.66601	0.616132	-2.70398	0.00685148	0.0120909	0	2	0	2	2	7	0	0	0	4	0	0	1	8	8	7	8	5	4	5	5	12	42	6	39	1	28	37	2	0	0	3	1	5	1	1	2	17	26	0	33	30	9
1904	6.71593	-1.58075	0.550585	-2.87105	0.00409114	0.00743667	1	2	2	3	5	3	2	0	0	2	3	0	2	2	13	8	6	4	6	10	4	9	37	13	33	2	13	34	3	1	1	1	0	5	1	2	3	17	23	0	18	23	13
1905	6.49118	-2.41146	0.616996	-3.9084	9.29107e-05	0.000221045	1	1	0	0	1	3	0	2	0	2	1	0	1	5	5	6	3	0	3	8	5	11	42	3	25	3	17	25	5	1	1	3	1	12	2	0	2	21	22	0	26	32	5
1906	6.63602	-1.56951	0.583349	-2.69052	0.00713404	0.0125535	1	2	1	1	2	1	3	2	0	2	1	0	2	9	5	11	4	1	7	6	7	5	37	15	30	1	27	44	0	2	0	4	0	8	1	0	2	21	11	0	16	28	5
1907	6.84048	-1.66879	0.555973	-3.00156	0.00268601	0.00506716	0	1	2	2	2	7	1	1	0	2	1	1	4	9	8	13	7	3	7	7	2	9	27	9	31	1	11	29	2	0	0	2	1	6	2	0	3	15	11	0	14	31	18
1908	6.17877	-1.81253	0.608823	-2.9771	0.00290987	0.00546434	0	3	0	1	3	5	1	1	0	1	0	0	4	7	6	14	3	6	4	5	5	5	32	7	31	2	23	28	3	2	4	0	0	3	1	0	0	17	24	0	10	25	10
1909	6.2822	-1.66532	0.588401	-2.83026	0.00465109	0.00837604	0	2	1	2	3	2	3	0	0	2	0	0	4	3	7	7	9	5	6	4	4	12	29	11	34	4	16	30	2	0	1	3	1	3	1	2	0	11	22	0	21	17	12
1910	6.44183	-1.30386	0.563714	-2.31298	0.0207239	0.0342154	1	4	1	4	1	3	1	1	0	2	1	0	2	9	4	8	5	4	4	3	4	7	40	10	29	2	14	27	3	0	2	1	0	3	3	1	1	15	16	1	17	35	10
1911	7.83902	-1.90677	0.612711	-3.11202	0.0018581	0.00361624	2	2	3	3	1	4	2	0	0	1	1	0	0	7	7	7	8	5	15	10	0	11	36	12	23	2	26	37	1	0	3	1	1	3	5	0	2	12	6	1	16	15	16
1912	6.10815	-1.40828	0.582314	-2.41842	0.0155879	0.0263006	0	1	3	2	0	3	4	0	0	2	3	0	0	9	4	6	9	3	7	3	3	7	44	7	37	1	18	33	2	1	0	3	0	6	1	1	3	15	15	1	21	16	7
1914	6.20472	-2.11909	0.577466	-3.66964	0.000242892	0.000543195	0	3	1	2	1	6	0	0	0	0	4	0	4	6	4	9	6	5	5	7	7	9	36	7	42	2	18	35	4	0	0	2	0	6	2	2	3	15	9	0	20	22	7
1916	6.44962	-1.6597	0.599436	-2.76877	0.00562681	0.0100304	0	4	2	3	1	1	0	0	0	3	0	0	0	10	6	10	6	6	3	4	6	5	28	6	23	2	18	30	1	0	3	1	1	3	2	0	3	11	15	2	13	19	13
1917	5.67336	-2.07867	0.644831	-3.2236	0.00126591	0.00252771	1	2	2	1	0	2	3	0	0	0	1	0	1	3	8	3	3	8	3	1	3	5	30	2	37	1	17	30	2	1	3	4	0	9	0	1	0	14	12	0	17	23	5
1919	5.75221	-1.7106	0.591767	-2.89067	0.00384423	0.00705732	1	0	1	3	1	3	2	0	0	2	3	0	0	4	5	6	1	2	4	5	3	8	31	6	25	2	17	24	2	1	1	2	1	5	1	3	0	17	11	0	13	25	9
1920	6.79343	-1.82614	0.608563	-3.00074	0.00269321	0.00507297	0	1	1	4	1	1	3	0	0	1	2	1	1	3	7	10	4	8	7	6	7	9	34	10	27	2	9	16	1	0	2	2	0	4	1	1	1	17	16	2	17	17	11
1921	6.18996	-1.58432	0.592638	-2.67334	0.00750995	0.0131613	1	3	1	4	1	7	0	0	0	1	2	0	1	6	10	6	8	6	4	6	2	8	32	5	32	1	24	30	2	1	2	0	0	9	1	3	0	8	14	0	15	24	11
1923	5.90759	-1.21544	0.564433	-2.15338	0.0312886	0.0502415	2	2	1	3	0	4	1	2	0	2	0	2	2	11	7	7	3	3	7	3	3	4	36	7	15	1	24	38	4	0	1	1	0	7	0	2	4	14	14	1	10	16	9
1924	6.14386	-1.40682	0.564206	-2.49345	0.0126508	0.0214924	1	1	2	1	1	7	1	2	0	1	5	1	6	7	4	9	2	1	8	2	6	9	28	7	25	2	11	29	4	2	0	1	1	3	3	1	1	9	9	0	17	18	8
1925	5.93596	-2.17132	0.620317	-3.50035	0.000464653	0.00100267	1	1	1	0	0	5	1	1	0	0	4	1	2	1	7	9	3	2	7	4	5	8	26	12	27	1	14	22	1	0	0	1	0	9	3	0	0	7	13	2	17	18	6
1926	5.14138	-1.79184	0.642562	-2.78858	0.00529397	0.0094645	0	5	1	2	0	0	1	0	0	1	1	0	3	4	6	3	4	3	4	5	6	5	37	4	25	0	12	13	1	0	1	2	0	5	4	0	3	15	6	0	12	14	15
1927	5.52658	-2.14971	0.61706	-3.48379	0.000494371	0.00105937	0	1	1	0	2	5	1	1	0	1	0	0	1	7	3	4	4	3	2	6	10	10	31	9	24	1	11	27	4	2	0	2	0	6	2	1	2	16	20	0	12	17	7
1928	4.84084	-1.63896	0.622742	-2.63184	0.00849238	0.0148586	2	0	1	0	0	4	2	1	0	2	2	0	2	5	3	6	2	2	2	0	2	5	29	4	24	1	14	25	3	0	1	1	0	2	0	2	2	13	15	0	10	15	8
1929	4.79464	-1.4594	0.632919	-2.30582	0.0211207	0.0348237	1	4	0	2	2	1	0	1	0	2	1	0	4	0	1	9	6	2	1	2	5	6	28	7	27	1	19	16	1	0	0	1	0	3	1	0	1	8	8	0	15	26	10
1930	6.42014	-1.53353	0.602795	-2.54404	0.010958	0.0188508	0	4	1	0	1	2	3	0	0	2	3	1	2	2	9	6	4	3	2	7	8	8	24	7	21	0	12	31	1	0	1	2	0	4	3	2	1	18	15	2	13	17	6
1931	6.04741	-1.52898	0.653038	-2.34133	0.0192152	0.0319388	1	5	0	1	0	4	0	0	1	1	1	0	2	6	2	7	6	5	9	6	7	4	29	8	23	1	13	24	1	0	0	0	0	3	2	0	4	14	8	1	7	18	6
1933	5.53164	-1.81234	0.643848	-2.81485	0.00487999	0.00874984	0	1	1	0	1	5	1	0	0	3	1	0	1	7	3	3	5	3	4	4	3	14	23	8	20	1	13	18	1	1	2	0	0	4	1	0	1	9	15	1	14	14	7
1934	4.29293	-2.1802	0.671262	-3.2479	0.00116259	0.00234423	0	0	1	1	1	4	2	0	0	0	0	0	1	3	4	7	0	6	4	7	3	5	39	3	17	0	12	27	1	0	0	2	0	1	3	2	0	4	18	0	11	19	4
1936	5.34288	-2.76723	0.650064	-4.25686	2.07317e-05	5.26482e-05	0	1	0	0	1	3	1	0	0	0	2	0	5	1	1	8	7	3	3	0	2	4	35	2	19	0	12	20	3	1	5	3	0	3	3	2	2	14	12	1	8	19	9
1938	5.16493	-1.93373	0.636315	-3.03895	0.00237407	0.00455554	0	1	0	3	1	2	2	0	0	1	0	0	1	6	3	8	9	4	6	5	1	4	38	8	16	3	12	15	2	0	1	2	0	3	3	3	3	5	6	0	11	27	6
1941	4.65757	-2.30615	0.660066	-3.49382	0.000476159	0.00102212	1	0	1	3	0	0	1	0	0	1	2	0	0	8	5	3	3	2	4	6	2	11	23	8	28	3	14	18	0	1	3	3	0	3	1	1	1	12	11	0	9	20	6
1943	4.44929	-2.08817	0.62691	-3.3309	0.000865666	0.00177063	0	1	0	0	1	3	2	0	0	0	2	2	1	4	2	7	3	4	2	8	1	6	30	5	20	2	17	18	0	0	1	1	0	8	1	0	0	9	4	2	18	16	4
1945	4.76971	-2.595	0.668787	-3.88015	0.00010439	0.000245038	1	1	1	0	0	3	0	0	0	1	0	1	2	3	0	4	5	4	2	7	3	5	25	9	22	0	16	31	1	0	2	0	1	7	3	1	2	8	7	0	12	16	6
1946	5.60353	-1.84658	0.643903	-2.86779	0.00413348	0.0074988	0	2	1	2	3	3	0	0	0	1	1	0	2	2	2	9	2	3	4	6	7	3	22	7	16	1	5	20	1	0	0	0	1	4	4	2	0	12	7	4	6	18	7
1947	3.91473	-1.86076	0.595764	-3.12332	0.00178825	0.00349134	2	2	1	1	0	1	1	0	0	1	0	3	2	5	4	3	4	1	3	4	4	5	14	5	11	1	14	20	2	0	0	2	0	2	0	1	1	7	12	0	13	21	6
1948	3.97216	-1.9756	0.626857	-3.1516	0.00162378	0.00319049	0	1	2	2	0	2	0	0	0	1	1	1	1	8	1	1	3	2	2	3	5	6	14	2	22	3	11	26	2	0	1	0	1	3	1	0	1	5	9	0	12	20	13
1950	5.5852	-1.48506	0.664087	-2.23624	0.0253359	0.0414956	0	1	1	1	0	6	3	1	0	0	2	0	2	1	5	0	0	4	2	2	3	6	17	5	19	0	9	16	5	2	0	3	0	3	3	1	1	11	15	1	9	18	5
1952	4.11469	-2.81043	0.658905	-4.26531	1.99628e-05	5.09423e-05	0	0	2	1	2	1	0	0	0	0	1	0	0	6	7	4	4	1	4	3	1	5	22	7	25	2	8	19	3	0	2	4	0	4	1	1	3	11	10	0	8	12	4
1954	3.52053	-1.97702	0.682362	-2.89732	0.00376361	0.00695081	0	0	0	2	1	2	1	0	0	1	1	0	1	0	0	6	2	3	4	4	3	4	19	8	20	1	5	22	0	0	0	2	0	3	2	0	0	11	6	0	8	15	4
1955	4.04789	-1.71737	0.652919	-2.6303	0.00853103	0.0149051	0	1	2	2	0	2	1	1	0	0	0	1	1	4	6	4	0	3	2	2	4	2	25	12	19	1	8	17	2	1	1	0	0	2	0	1	1	7	10	1	10	17	4
1956	3.85327	-1.2819	0.581822	-2.20325	0.0275771	0.0447492	1	3	1	2	2	4	1	0	0	0	2	1	3	3	4	4	2	3	1	2	5	4	22	7	24	1	12	19	1	1	1	1	0	1	1	0	1	6	15	0	5	10	6
1957	4.53445	-1.55132	0.634576	-2.44465	0.0144991	0.0245309	0	3	2	3	0	3	0	0	0	1	0	0	3	5	4	4	1	4	5	3	4	8	21	3	26	1	8	24	2	1	0	0	0	3	1	1	2	8	6	1	14	16	4
1958	3.62508	-2.22774	0.643688	-3.46091	0.000538355	0.00113776	1	0	1	3	0	1	1	0	0	0	0	0	1	4	3	3	3	3	2	5	2	9	14	3	19	0	9	15	1	1	1	4	0	6	1	1	1	7	7	0	9	13	7
1960	4.25268	-2.43845	0.657516	-3.70858	0.000208423	0.000470603	1	0	0	1	1	2	0	0	0	1	1	0	1	3	3	3	8	1	3	2	1	5	18	6	21	1	11	20	0	3	1	1	1	0	1	1	0	8	9	1	6	15	4
1961	3.32169	-1.57099	0.617997	-2.54206	0.01102	0.0189046	2	2	0	2	0	2	0	0	0	1	2	1	1	3	4	6	3	2	1	5	4	3	16	6	25	1	11	17	1	0	1	1	0	6	2	0	1	9	5	0	14	15	3
1962	3.37232	-1.61923	0.676309	-2.39422	0.0166558	0.0279872	0	2	0	1	0	3	0	0	0	1	2	0	2	1	3	3	1	4	2	3	1	4	13	7	21	1	7	20	1	0	0	1	0	2	0	0	2	3	5	1	12	9	3
1963	3.77187	-2.00024	0.694957	-2.87822	0.00399926	0.00730919	0	2	0	1	0	1	0	2	0	0	0	0	2	3	5	2	2	6	1	1	1	3	14	7	21	0	9	15	2	0	0	2	0	5	0	0	3	2	11	1	9	18	4
1968	4.10831	-2.2474	0.721689	-3.11408	0.0018452	0.00359683	0	0	0	3	1	3	0	0	0	0	0	0	0	1	4	3	4	2	8	5	3	8	21	8	20	0	8	17	0	1	0	0	0	0	0	1	2	5	4	1	8	16	4
1969	4.01288	-1.57299	0.679652	-2.3144	0.0206457	0.0341321	0	0	1	4	1	1	0	1	0	1	1	0	0	2	4	3	1	3	8	5	7	3	10	3	18	0	11	13	0	0	1	3	0	1	2	1	3	5	8	1	4	8	3
1970	3.36793	-2.16327	0.692347	-3.12454	0.00178084	0.00348241	0	2	0	0	0	3	0	0	0	0	0	1	0	2	1	4	3	2	2	0	2	3	16	4	23	0	7	14	1	2	2	0	0	1	1	1	0	6	6	1	4	14	6
1971	3.55984	-2.26968	0.655075	-3.46476	0.0005307	0.00112351	0	1	3	0	0	2	1	0	0	0	0	0	0	2	2	3	3	3	2	7	2	4	8	7	21	1	11	17	1	0	1	0	1	5	1	1	1	9	5	0	7	15	5
1972	3.0154	-1.62708	0.645064	-2.52235	0.0116573	0.0198594	0	1	0	1	1	3	1	0	0	1	0	1	4	4	2	5	2	3	1	3	1	6	14	9	11	0	5	13	1	0	0	0	0	4	0	3	0	6	4	0	8	12	6
1988	2.74186	-2.0478	0.705394	-2.90306	0.00369534	0.00683498	0	0	0	1	0	4	0	0	0	0	1	0	0	1	3	2	0	1	1	2	4	3	12	5	16	0	5	13	0	1	0	3	0	2	0	1	2	4	7	0	6	16	5
1990	2.80284	-1.92456	0.670371	-2.87089	0.00409319	0.00743667	1	0	0	1	1	3	1	0	0	0	0	0	3	4	2	4	2	3	3	3	4	6	14	8	7	1	5	15	1	1	1	0	0	0	1	0	0	6	4	0	8	11	6
1991	3.40941	-1.71964	0.664545	-2.58769	0.00966213	0.0167859	0	1	2	0	0	2	1	2	0	0	1	0	2	4	1	3	1	3	5	4	6	5	7	7	11	1	8	19	3	0	1	0	0	4	0	1	0	5	6	0	10	9	3
1992	2.86544	-1.7956	0.685712	-2.61859	0.00882935	0.0153608	1	1	0	1	0	4	0	0	0	0	1	0	1	3	2	3	1	4	3	2	1	5	8	2	23	2	7	6	0	1	1	0	0	1	2	0	1	9	7	0	6	10	2
1994	3.07267	-1.84043	0.843816	-2.18108	0.0291778	0.0470363	0	1	0	0	0	0	0	0	1	1	1	0	2	1	1	3	0	0	0	4	1	5	12	1	12	1	6	13	0	0	1	0	0	0	0	0	0	4	4	1	2	7	2
1995	2.93547	-1.92196	0.74395	-2.58345	0.00978175	0.0169698	1	0	1	0	0	2	0	2	0	0	0	0	0	2	3	3	0	1	2	0	1	5	14	1	15	2	8	14	0	1	1	1	1	2	1	0	2	7	4	0	3	7	3
1996	2.63695	-2.59834	0.714926	-3.63441	0.000278612	0.000617465	0	0	1	0	1	0	0	0	0	1	1	0	1	3	1	3	1	1	1	1	1	6	14	6	13	0	6	13	1	1	1	0	0	2	0	2	0	6	3	0	6	8	7
1997	2.63016	-1.35548	0.652737	-2.07661	0.0378376	0.0597435	0	1	1	0	1	2	0	0	0	3	1	0	2	2	3	4	3	0	4	1	2	2	10	5	17	2	4	10	1	0	1	0	0	5	2	1	0	7	4	0	4	7	4
1998	3.108	-2.12204	0.723783	-2.93187	0.00336931	0.0062602	0	0	0	1	0	3	0	1	0	0	0	0	0	0	2	0	2	2	2	4	2	4	9	4	10	2	7	12	1	0	1	0	0	5	1	1	0	4	5	1	7	11	8
1999	2.40027	-1.80753	0.710665	-2.54344	0.0109767	0.0188567	2	0	0	0	0	0	0	2	0	0	2	0	1	1	1	1	3	2	4	0	3	2	6	5	11	0	4	14	1	0	0	0	0	3	0	2	2	2	3	1	3	11	2
2002	3.1116	-1.57521	0.705382	-2.23313	0.0255404	0.0417193	0	0	1	2	0	1	1	1	0	0	1	0	1	3	1	2	0	1	1	3	1	3	5	2	13	0	4	12	2	0	1	0	1	2	0	2	0	2	6	1	9	11	3
2005	3.26699	-3.27312	0.773823	-4.22981	2.33888e-05	5.89514e-05	0	0	0	0	1	0	0	0	0	0	0	0	0	0	2	2	3	2	3	3	5	2	15	5	15	2	1	10	2	0	2	0	1	3	0	0	1	4	3	1	6	3	3
2014	1.94406	-1.59285	0.667556	-2.3861	0.0170282	0.028535	1	1	0	1	0	1	0	0	0	0	3	0	1	3	2	2	2	1	3	3	2	0	8	3	12	1	3	7	0	0	0	3	0	3	0	1	0	2	5	0	9	7	5
2017	2.38411	-1.39127	0.67953	-2.0474	0.0406187	0.0637258	0	1	2	1	0	1	0	0	0	1	1	1	2	0	3	2	4	0	2	1	2	2	10	3	10	3	1	9	3	0	0	0	0	2	1	0	1	2	3	1	2	9	8
2019	3.48775	-2.73143	0.746066	-3.66111	0.000251127	0.000559577	0	0	0	0	0	1	1	0	0	0	1	0	0	1	4	5	0	2	1	4	3	5	14	5	19	1	11	9	1	1	0	3	0	3	0	1	1	4	2	3	5	8	3
2020	2.41321	-2.02345	0.744458	-2.71802	0.00656741	0.0116229	0	2	1	0	0	1	0	0	0	0	0	0	3	6	1	1	0	1	3	3	0	3	10	4	12	0	4	5	0	0	0	0	1	2	0	0	1	0	6	0	4	7	3
2026	2.00812	-2.18565	0.716162	-3.05189	0.00227402	0.00438408	0	1	0	1	0	0	0	0	0	0	0	0	1	2	2	0	3	0	2	2	2	2	4	3	9	2	3	2	0	0	1	2	0	3	1	0	1	3	1	1	2	6	2
2036	2.12981	-1.39382	0.640629	-2.1757	0.0295777	0.0476185	0	1	0	0	2	3	1	0	0	0	0	0	2	3	2	2	3	1	1	3	2	1	11	2	4	3	5	3	1	0	0	1	0	1	2	1	2	6	3	0	3	5	2
2040	1.63162	-2.13463	0.777829	-2.74434	0.00606321	0.0107771	0	0	0	0	0	1	0	0	0	0	1	0	0	5	1	3	0	0	0	2	0	5	9	2	9	0	4	6	2	1	0	1	0	4	1	0	1	2	1	0	1	5	1
2044	2.93887	-2.45669	0.848307	-2.89599	0.0037796	0.00695945	0	0	0	0	1	0	0	0	1	0	0	0	1	2	2	0	0	3	2	2	1	5	5	2	14	2	5	4	2	0	0	0	0	4	0	1	0	3	3	1	7	7	3
2047	1.80649	-1.45546	0.734145	-1.98253	0.0474202	0.0735521	0	1	0	0	0	2	0	1	0	0	1	0	1	1	0	1	2	1	4	2	2	4	6	2	3	1	2	5	0	0	0	1	0	0	0	1	0	3	5	0	10	2	1
2049	2.25069	-2.13224	0.730514	-2.91882	0.0035136	0.00650862	1	0	0	1	0	1	0	0	0	0	0	1	4	2	2	1	4	4	0	3	1	2	5	1	10	0	4	5	0	1	1	0	0	1	0	1	3	5	4	0	3	4	4
2051	2.4214	-2.2582	0.747939	-3.01923	0.0025342	0.00479549	1	0	0	0	1	0	0	0	0	0	0	1	0	2	0	1	1	2	2	1	1	2	9	0	3	0	5	4	4	0	0	0	1	2	0	0	0	5	3	1	4	6	4
2052	3.29448	-1.49385	0.744098	-2.0076	0.044686	0.0695745	0	1	0	0	0	2	0	1	0	1	0	2	3	2	0	1	3	0	2	1	4	2	7	7	6	0	3	8	3	2	0	0	0	1	2	0	1	2	3	2	3	7	2
2056	2.51926	-2.47158	0.80284	-3.07854	0.00208015	0.00402293	0	0	1	0	0	0	0	0	0	0	1	0	1	0	1	1	1	2	1	1	2	3	5	2	10	0	5	8	0	2	0	2	1	1	0	1	0	2	0	1	3	8	1
2062	2.01805	-1.59985	0.732425	-2.18432	0.0289386	0.0467119	0	0	0	0	0	1	0	1	0	1	2	0	1	1	3	1	0	1	2	1	2	0	5	2	6	0	5	1	2	1	0	0	0	1	0	1	1	5	2	0	1	5	3
2065	2.53178	-1.67257	0.811459	-2.06119	0.0392851	0.0617911	0	1	0	0	0	0	0	0	1	0	0	2	2	3	3	1	0	1	4	2	0	4	5	0	8	3	3	2	1	0	0	0	0	2	0	2	0	6	4	1	5	8	0
2077	1.97702	-2.73966	0.799829	-3.42531	0.000614096	0.00128897	0	0	0	0	0	0	0	0	0	0	0	0	1	1	0	1	1	1	3	2	1	3	7	5	4	2	0	5	2	0	0	0	0	2	1	1	0	3	4	1	2	8	3
2078	1.48076	-2.245	0.777799	-2.88635	0.00389743	0.00714432	0	0	1	0	0	0	0	0	0	0	0	0	2	1	0	2	1	2	2	1	0	1	5	1	8	0	2	6	0	0	0	1	0	1	1	0	0	1	3	0	4	5	4
2089	1.26512	-1.47025	0.740381	-1.98581	0.0470548	0.0731699	0	0	0	0	0	0	1	0	0	0	1	1	0	1	2	0	1	0	1	0	0	1	5	2	1	2	2	4	0	1	1	2	0	0	1	0	0	1	2	0	4	7	2
2095	0.878169	-1.53323	0.713025	-2.15032	0.0315298	0.0505627	0	0	1	0	0	0	0	0	0	0	0	0	0	4	0	3	3	1	0	2	0	1	6	1	7	1	3	2	0	0	0	0	0	3	1	0	0	2	0	0	1	6	1
2100	1.58638	-1.92513	0.804614	-2.39261	0.0167289	0.0280717	0	0	0	0	0	1	0	0	0	1	0	0	1	0	5	0	4	0	1	2	1	4	0	1	7	0	2	2	1	0	0	2	0	0	1	0	1	1	4	0	2	8	0
2104	1.57347	-1.68728	0.811444	-2.07935	0.0375851	0.0594977	0	0	0	1	0	0	0	0	0	0	1	0	1	1	0	2	1	1	0	0	0	2	0	0	5	1	4	4	0	0	0	0	0	1	1	2	0	1	2	1	1	2	2
2110	2.2612	-1.83732	0.903287	-2.03404	0.0419477	0.065727	0	0	0	0	0	1	0	0	1	0	0	0	2	0	0	0	1	1	1	0	1	1	3	2	6	3	2	6	0	0	0	0	0	1	1	0	2	4	1	0	3	2	3
2120	1.50085	-2.23492	0.825015	-2.70894	0.00674985	0.0119286	0	0	0	0	0	0	0	0	0	0	0	0	0	0	1	1	2	1	0	1	1	2	2	3	2	0	1	4	0	0	1	0	0	0	0	2	0	3	2	1	2	4	1
2124	1.88869	-1.61731	0.82165	-1.96837	0.0490256	0.0758509	0	1	2	0	0	0	0	0	0	0	0	0	1	0	0	2	0	0	3	0	2	1	3	1	5	1	2	2	0	0	0	0	0	2	0	0	0	2	1	2	2	4	3
[truncated: 22 more columns]
